# Supplementary material for: The Relationship between the Aberrant Long Non-Coding RNA-Mediated Competitive Endogenous RNA Network and Alzheimer’s Disease Pathogenesis
Source: MDPI journal article supplement (doi:10.3390/ijms23158497), 2022-07-31
Supplement: s1 [file s1]

# Supplementary Materials

## Content

|                                                                                                                                                               |     |
|---------------------------------------------------------------------------------------------------------------------------------------------------------------|-----|
| Figure S1. Processing of establishment of potential interactions between lncRNAs, miRNAs, and mRNAs in the cerebral cortex and hippocampus of 5×FAD mice..... | 2   |
| Table S1. Quality assessment of 12 cDNA libraries associated with lncRNAs.....                                                                                | 3   |
| Table S2. Information of the upregulated lncRNA-miRNA network in the cortex of 7-month-old 5×FAD mice.....                                                    | 4   |
| Table S3. Information of the downregulated lncRNA-miRNA network in the cortex of 7-month-old 5×FAD mice.....                                                  | 36  |
| Table S4. Correlated information of the upregulated lncRNA-associated ceRNA network in the cerebral cortex of 5×FAD mice.....                                 | 47  |
| Table S5. Correlated information of the downregulated lncRNA-associated ceRNA network in the cerebral cortex of 5×FAD mice.....                               | 50  |
| Table S6. Information of the upregulated lncRNA-miRNA network in the hippocampus of 7-month-old 5×FAD mice.....                                               | 51  |
| Table S7. Information of the downregulated lncRNA-miRNA network in the hippocampus of 7-month-old 5×FAD mice.....                                             | 71  |
| Table S8. Correlated information of the upregulated lncRNA-associated ceRNA network in the hippocampus of 5×FAD mice.....                                     | 85  |
| Table S9. Correlated information of the downregulated lncRNA-associated ceRNA network in the hippocampus of 5×FAD mice.....                                   | 87  |
| Table S10. Information of the lncRNA-miRNA network in the cerebral cortex and hippocampus of 7-month-old 5×FAD mice.....                                      | 89  |
| Table S11. Information of RNAs in the L-M-T network based on RNA-seq results.....                                                                             | 115 |

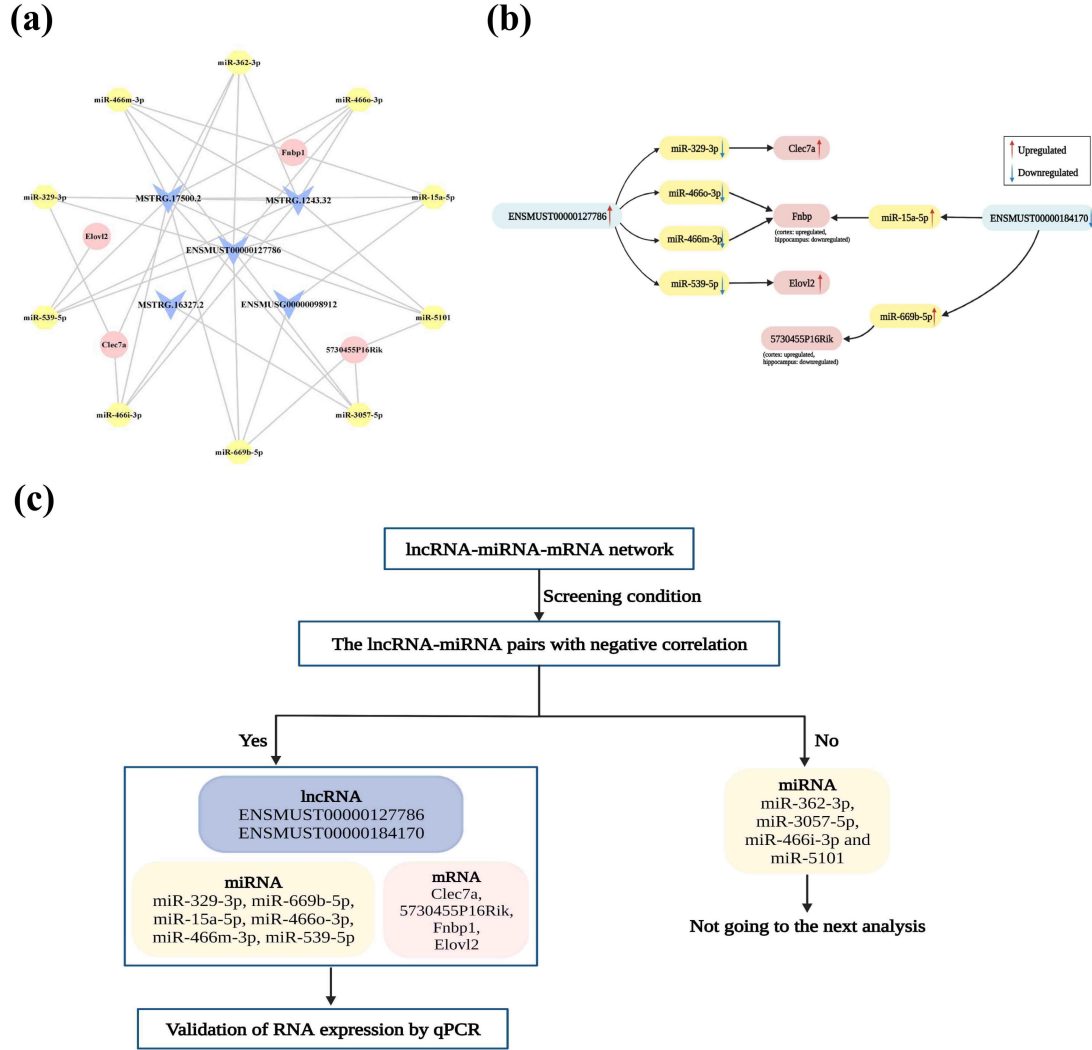

**Figure S1.** Processing of establishment of potential interactions between lncRNAs, miRNAs, and mRNAs in the cerebral cortex and hippocampus of 5×FAD mice. (a) Establishment of the L-M-T network based on five lncRNAs, ten miRNAs, and four mRNAs. The lncRNAs, miRNAs, and mRNAs are indicated as V-shapes, octagons, and circular shapes, respectively. (b) Potential interactions between screened lncRNAs, miRNAs, and mRNAs in the L-M-T network. The arrows indicate the potential effect of one RNA on another RNA. (c) Workflow of screened RNAs for qPCR validation. lncRNA: long non-coding RNA; miRNA: microRNA; mRNA: messenger RNA; qPCR: quantitative real-time Polymerase Chain Reaction.

**Table S1.** Quality assessment of 12 cDNA libraries associated with lncRNAs.

| Samples                                     | Total Reads Count | Total Bases Count (bp) | Average Read Length (bp) | N Bases Count (bp) | N Bases Ratio (%) | GC Bases Count (bp) | GC Bases Ratio (%) |
|---------------------------------------------|-------------------|------------------------|--------------------------|--------------------|-------------------|---------------------|--------------------|
| Cerebral cortex of 7-month-old WT mice-1    | 70,848,618        | 10,627,292,700         | 150                      | 198,826            | 0.00              | 5,216,312,261       | 49.08              |
| Cerebral cortex of 7-month-old WT mice-2    | 73,438,846        | 11,015,826,900         | 150                      | 219,101            | 0.00              | 5,345,363,860       | 48.52              |
| Cerebral cortex of 7-month-old WT mice-3    | 54,045,806        | 8,106,870,900          | 150                      | 196,809            | 0.00              | 3,805,904,026       | 46.95              |
| Cerebral cortex of 7-month-old 5×FAD mice-1 | 70,387,314        | 10,558,097,100         | 150                      | 234,038            | 0.00              | 5,072,148,931       | 48.04              |
| Cerebral cortex of 7-month-old 5×FAD mice-2 | 59,014,786        | 8,852,217,900          | 150                      | 205,973            | 0.00              | 4,217,932,828       | 47.65              |
| Cerebral cortex of 7-month-old 5×FAD mice-3 | 70,632,868        | 10,594,930,200         | 150                      | 214,497            | 0.00              | 5,095,059,928       | 48.09              |
| Hippocampus of 7-month-old WT mice-1        | 77,487,284        | 11,623,092,600         | 150                      | 300,138            | 0.00              | 5,528,175,705       | 47.56              |
| Hippocampus of 7-month-old WT mice-2        | 77,478,166        | 11,621,724,900         | 150                      | 279,909            | 0.00              | 5,488,985,013       | 47.23              |
| Hippocampus of 7-month-old WT mice-3        | 72,130,852        | 10,819,627,800         | 150                      | 266,620            | 0.00              | 5,191,919,471       | 47.99              |
| Hippocampus of 7-month-old 5×FAD mice-1     | 59,970,682        | 8,995,602,300          | 150                      | 180,081            | 0.00              | 4,369,498,492       | 48.57              |
| Hippocampus of 7-month-old 5×FAD mice-2     | 69,198,998        | 10,379,849,700         | 150                      | 208,504            | 0.00              | 4,884,950,222       | 47.06              |
| Hippocampus of 7-month-old 5×FAD mice-3     | 62,388,494        | 9,358,274,100          | 150                      | 222,352            | 0.00              | 4,585,485,011       | 49.00              |

**Table S2.** Information of the upregulated lncRNA-miRNA network in the cortex of 7-month-old 5×FAD mice.

| Upregulated lncRNA | miRNA targets |
|--------------------|---------------|
| ENSMUST00000127786 | miR-466m-3p   |
| ENSMUST00000127786 | miR-669a-3-3p |
| ENSMUST00000127786 | miR-669c-3p   |
| ENSMUST00000127786 | miR-466o-3p   |
| ENSMUST00000127786 | miR-98-5p     |
| ENSMUST00000127786 | miR-3473d     |
| ENSMUST00000127786 | miR-686       |
| ENSMUST00000127786 | miR-6904-5p   |
| ENSMUST00000127786 | miR-6984-5p   |
| ENSMUST00000127786 | miR-6240      |
| ENSMUST00000127786 | miR-466b-3p   |
| ENSMUST00000127786 | miR-466p-3p   |
| ENSMUST00000127786 | miR-3060-3p   |
| ENSMUST00000127786 | miR-466c-3p   |
| ENSMUST00000127786 | miR-669i      |
| ENSMUST00000127786 | miR-466n-3p   |
| ENSMUST00000127786 | miR-669p-3p   |
| ENSMUST00000127786 | miR-7000-5p   |
| ENSMUST00000127786 | miR-6914-5p   |
| ENSMUST00000127786 | miR-186-5p    |
| ENSMUST00000127786 | miR-7092-3p   |
| ENSMUST00000127786 | miR-448-3p    |
| ENSMUST00000127786 | miR-494-3p    |
| ENSMUST00000127786 | miR-330-3p    |
| ENSMUST00000127786 | miR-3569-5p   |
| ENSMUST00000127786 | miR-30c-2-3p  |
| ENSMUST00000127786 | miR-26a-5p    |
| ENSMUST00000127786 | miR-107-3p    |
| ENSMUST00000127786 | miR-760-5p    |
| ENSMUST00000127786 | miR-103-3p    |
| ENSMUST00000127786 | miR-6916-3p   |
| ENSMUST00000127786 | miR-6927-3p   |
| ENSMUST00000127786 | miR-7116-5p   |
| ENSMUST00000127786 | let-7a-5p     |
| ENSMUST00000127786 | let-7d-5p     |
| ENSMUST00000127786 | miR-6970-5p   |
| ENSMUST00000127786 | miR-543-3p    |
| ENSMUST00000127786 | miR-221-5p    |
| ENSMUST00000127786 | miR-132-3p    |
| ENSMUST00000127786 | miR-23b-3p    |
| ENSMUST00000127786 | miR-195a-5p   |

---

|                    |               |
|--------------------|---------------|
| ENSMUST00000127786 | miR-129b-3p   |
| ENSMUST00000127786 | miR-1191b-5p  |
| ENSMUST00000127786 | miR-6982-3p   |
| ENSMUST00000127786 | miR-425-5p    |
| ENSMUST00000127786 | miR-543-5p    |
| ENSMUST00000127786 | miR-148b-3p   |
| ENSMUST00000127786 | miR-3069-5p   |
| ENSMUST00000127786 | miR-466d-3p   |
| ENSMUST00000127786 | miR-3095-5p   |
| ENSMUST00000127786 | miR-466a-3p   |
| ENSMUST00000127786 | miR-27b-3p    |
| ENSMUST00000127786 | miR-466e-3p   |
| ENSMUST00000127786 | miR-6933-3p   |
| ENSMUST00000127786 | miR-6925-5p   |
| ENSMUST00000127786 | miR-201-5p    |
| ENSMUST00000127786 | miR-3474      |
| ENSMUST00000127786 | let-7g-5p     |
| ENSMUST00000127786 | miR-551b-5p   |
| ENSMUST00000127786 | miR-1933-5p   |
| ENSMUST00000127786 | miR-342-3p    |
| ENSMUST00000127786 | miR-410-3p    |
| ENSMUST00000127786 | miR-1949      |
| ENSMUST00000127786 | miR-26b-5p    |
| ENSMUST00000127786 | miR-6937-5p   |
| ENSMUST00000127786 | miR-3064-5p   |
| ENSMUST00000127786 | miR-5615-5p   |
| ENSMUST00000127786 | miR-6971-3p   |
| ENSMUST00000127786 | miR-344-5p    |
| ENSMUST00000127786 | miR-6999-5p   |
| ENSMUST00000127786 | miR-704       |
| ENSMUST00000127786 | miR-5101      |
| ENSMUST00000127786 | miR-148b-5p   |
| ENSMUST00000127786 | miR-1981-5p   |
| ENSMUST00000127786 | miR-7066-3p   |
| ENSMUST00000127786 | miR-3082-5p   |
| ENSMUST00000127786 | miR-423-5p    |
| ENSMUST00000127786 | miR-6516-5p   |
| ENSMUST00000127786 | miR-30c-1-3p  |
| ENSMUST00000127786 | miR-486a-3p   |
| ENSMUST00000127786 | miR-1961      |
| ENSMUST00000127786 | miR-124-3p    |
| ENSMUST00000127786 | miR-145a-5p   |
| ENSMUST00000127786 | miR-7665-5p   |
| ENSMUST00000127786 | miR-135a-2-3p |

---

---

|                    |               |
|--------------------|---------------|
| ENSMUST00000127786 | miR-5114      |
| ENSMUST00000127786 | miR-3089-5p   |
| ENSMUST00000127786 | miR-23a-3p    |
| ENSMUST00000127786 | miR-329-3p    |
| ENSMUST00000127786 | miR-15b-5p    |
| ENSMUST00000127786 | miR-31-5p     |
| ENSMUST00000127786 | miR-467a-3p   |
| ENSMUST00000127786 | miR-7661-3p   |
| ENSMUST00000127786 | miR-6911-5p   |
| ENSMUST00000127786 | miR-3083-5p   |
| ENSMUST00000127786 | miR-29b-3p    |
| ENSMUST00000127786 | miR-674-5p    |
| ENSMUST00000127786 | miR-203-3p    |
| ENSMUST00000127786 | miR-421-3p    |
| ENSMUST00000127786 | miR-654-3p    |
| ENSMUST00000127786 | miR-5124b     |
| ENSMUST00000127786 | miR-3074-5p   |
| ENSMUST00000127786 | miR-130b-5p   |
| ENSMUST00000127786 | let-7f-5p     |
| ENSMUST00000127786 | miR-128-3p    |
| ENSMUST00000127786 | let-7e-5p     |
| ENSMUST00000127786 | miR-3080-5p   |
| ENSMUST00000127786 | miR-466f-3p   |
| ENSMUST00000127786 | miR-1943-5p   |
| ENSMUST00000127786 | miR-6982-5p   |
| ENSMUST00000127786 | miR-669f-3p   |
| ENSMUST00000127786 | miR-6976-5p   |
| ENSMUST00000127786 | miR-694       |
| ENSMUST00000127786 | miR-5617-5p   |
| ENSMUST00000127786 | miR-3094-3p   |
| ENSMUST00000127786 | miR-5709-5p   |
| ENSMUST00000127786 | miR-344d-1-5p |
| ENSMUST00000127786 | let-7i-5p     |
| ENSMUST00000127786 | miR-3065-5p   |
| ENSMUST00000127786 | miR-672-3p    |
| ENSMUST00000127786 | miR-7236-3p   |
| ENSMUST00000127786 | miR-1843a-5p  |
| ENSMUST00000127786 | miR-192-5p    |
| ENSMUST00000127786 | miR-219b-3p   |
| ENSMUST00000127786 | miR-1912-3p   |
| ENSMUST00000127786 | miR-204-3p    |
| ENSMUST00000127786 | miR-7087-5p   |
| ENSMUST00000127786 | miR-30a-3p    |
| ENSMUST00000127786 | miR-7054-5p   |

---

---

|                    |               |
|--------------------|---------------|
| ENSMUST00000127786 | miR-6537-3p   |
| ENSMUST00000127786 | miR-192-3p    |
| ENSMUST00000127786 | miR-7022-5p   |
| ENSMUST00000127786 | miR-505-3p    |
| ENSMUST00000127786 | miR-501-5p    |
| ENSMUST00000127786 | miR-6903-3p   |
| ENSMUST00000127786 | miR-24-3p     |
| ENSMUST00000127786 | miR-1934-5p   |
| ENSMUST00000127786 | miR-185-3p    |
| ENSMUST00000127786 | miR-7a-5p     |
| ENSMUST00000127786 | miR-8118      |
| ENSMUST00000127786 | let-7f-2-3p   |
| ENSMUST00000127786 | miR-486b-3p   |
| ENSMUST00000127786 | miR-335-3p    |
| ENSMUST00000127786 | miR-344d-3-5p |
| ENSMUST00000127786 | miR-5710      |
| ENSMUST00000127786 | miR-8106      |
| ENSMUST00000127786 | miR-409-5p    |
| ENSMUST00000127786 | miR-503-3p    |
| ENSMUST00000127786 | miR-382-3p    |
| ENSMUST00000127786 | miR-7647-3p   |
| ENSMUST00000127786 | miR-6947-5p   |
| ENSMUST00000127786 | miR-344c-5p   |
| ENSMUST00000127786 | miR-212-3p    |
| ENSMUST00000127786 | miR-6964-3p   |
| ENSMUST00000127786 | miR-29a-3p    |
| ENSMUST00000127786 | miR-384-5p    |
| ENSMUST00000127786 | miR-1955-3p   |
| ENSMUST00000127786 | miR-222-3p    |
| ENSMUST00000127786 | miR-1931      |
| ENSMUST00000127786 | miR-3087-3p   |
| ENSMUST00000127786 | miR-3099-3p   |
| ENSMUST00000127786 | miR-466i-3p   |
| ENSMUST00000127786 | miR-674-3p    |
| ENSMUST00000127786 | miR-7117-5p   |
| ENSMUST00000127786 | miR-7a-2-3p   |
| ENSMUST00000127786 | miR-3473e     |
| ENSMUST00000127786 | miR-3102-3p   |
| ENSMUST00000127786 | miR-1969      |
| ENSMUST00000127786 | miR-299a-5p   |
| ENSMUST00000127786 | miR-1298-5p   |
| ENSMUST00000127786 | miR-1264-3p   |
| ENSMUST00000127786 | miR-8111      |
| ENSMUST00000127786 | miR-344g-5p   |

---

---

|                    |             |
|--------------------|-------------|
| ENSMUST00000127786 | miR-3095-3p |
| ENSMUST00000127786 | miR-215-5p  |
| ENSMUST00000127786 | miR-3475-3p |
| ENSMUST00000127786 | miR-153-5p  |
| ENSMUST00000127786 | miR-7061-5p |
| ENSMUST00000127786 | miR-7015-3p |
| ENSMUST00000127786 | miR-145a-3p |
| ENSMUST00000127786 | miR-7224-3p |
| ENSMUST00000127786 | miR-511-5p  |
| ENSMUST00000127786 | miR-221-3p  |
| ENSMUST00000127786 | miR-20b-5p  |
| ENSMUST00000127786 | miR-1298-3p |
| ENSMUST00000127786 | miR-504-5p  |
| ENSMUST00000127786 | miR-6914-3p |
| ENSMUST00000127786 | miR-7066-5p |
| ENSMUST00000127786 | miR-30c-5p  |
| ENSMUST00000127786 | miR-1198-5p |
| ENSMUST00000127786 | miR-7116-3p |
| ENSMUST00000127786 | miR-7013-5p |
| ENSMUST00000127786 | miR-30f     |
| ENSMUST00000127786 | miR-7b-5p   |
| ENSMUST00000127786 | miR-6997-5p |
| ENSMUST00000127786 | miR-3473b   |
| ENSMUST00000127786 | miR-874-3p  |
| ENSMUST00000127786 | miR-26b-3p  |
| ENSMUST00000127786 | miR-493-5p  |
| ENSMUST00000127786 | miR-3058-5p |
| ENSMUST00000127786 | miR-1983    |
| ENSMUST00000127786 | miR-7687-3p |
| ENSMUST00000127786 | miR-6902-3p |
| ENSMUST00000127786 | miR-3103-3p |
| ENSMUST00000127786 | miR-181b-5p |
| ENSMUST00000127786 | miR-222-5p  |
| ENSMUST00000127786 | miR-6911-3p |
| ENSMUST00000127786 | miR-7240-5p |
| ENSMUST00000127786 | miR-7031-5p |
| ENSMUST00000127786 | miR-3079-3p |
| ENSMUST00000127786 | miR-329-5p  |
| ENSMUST00000127786 | miR-412-3p  |
| ENSMUST00000127786 | miR-1224-5p |
| ENSMUST00000127786 | miR-466q    |
| ENSMUST00000127786 | miR-7077-5p |
| ENSMUST00000127786 | miR-3062-5p |
| ENSMUST00000127786 | miR-322-3p  |

---



---

|                    |                  |
|--------------------|------------------|
| ENSMUST00000127786 | miR-328-3p       |
| ENSMUST00000127786 | miR-26a-2-3p     |
| ENSMUST00000127786 | miR-223-5p       |
| ENSMUST00000127786 | miR-3472         |
| ENSMUST00000127786 | miR-7242-3p      |
| ENSMUST00000127786 | miR-129-2-3p     |
| ENSMUST00000127786 | miR-7085-5p      |
| ENSMUST00000127786 | miR-186-3p       |
| ENSMUST00000127786 | miR-3081-3p      |
| ENSMUST00000127786 | miR-324-3p       |
| ENSMUST00000127786 | miR-3078-5p      |
| ENSMUST00000127786 | miR-6991-5p      |
| ENSMUST00000127786 | miR-344d-3p      |
| ENSMUST00000127786 | miR-30d-5p       |
| ENSMUST00000127786 | miR-302b-3p      |
| ENSMUST00000127786 | miR-320-3p       |
| ENSMUST00000127786 | miR-181b-2-3p    |
| ENSMUST00000127786 | miR-7004-5p      |
| ENSMUST00000127786 | miR-3085-3p      |
| ENSMUST00000127786 | miR-384-3p       |
| ENSMUST00000127786 | miR-6399         |
| ENSMUST00000127786 | miR-30e-3p       |
| ENSMUST00000127786 | miR-351-5p       |
| ENSMUST00000127786 | miR-7019-3p      |
| ENSMUST00000127786 | miR-7085-3p      |
| ENSMUST00000127786 | miR-6516-3p      |
| ENSMUST00000127786 | miR-129-1-3p     |
| ENSMUST00000127786 | miR-361-5p       |
| ENSMUST00000127786 | miR-3105-3p      |
| ENSMUST00000127786 | miR-7651-5p      |
| ENSMUST00000127786 | miR-125a-5p      |
| ENSMUST00000127786 | miR-8099         |
| ENSMUST00000127786 | miR-6975-3p      |
| ENSMUST00000127786 | miR-483-3p       |
| ENSMUST00000127786 | miR-3091-3p      |
| ENSMUST00000127786 | miR-683          |
| ENSMUST00000127786 | miR-483-5p       |
| ENSMUST00000127786 | miR-450b-3p      |
| ENSMUST00000127786 | miR-3102-5p.2-5p |
| ENSMUST00000127786 | miR-135b-3p      |
| ENSMUST00000127786 | miR-450a-1-3p    |
| ENSMUST00000127786 | miR-345-3p       |
| ENSMUST00000127786 | miR-667-3p       |
| ENSMUST00000127786 | miR-3113-5p      |

---

---

|                    |               |
|--------------------|---------------|
| ENSMUST00000127786 | miR-5623-5p   |
| ENSMUST00000127786 | miR-6540-5p   |
| ENSMUST00000127786 | miR-5626-5p   |
| ENSMUST00000127786 | miR-505-5p    |
| ENSMUST00000127786 | miR-338-5p    |
| ENSMUST00000127786 | miR-664-3p    |
| ENSMUST00000127786 | miR-501-3p    |
| ENSMUST00000127786 | miR-664-5p    |
| ENSMUST00000127786 | miR-3094-5p   |
| ENSMUST00000127786 | miR-450a-2-3p |
| ENSMUST00000127786 | miR-539-5p    |
| ENSMUST00000127786 | miR-411-3p    |
| ENSMUST00000127786 | miR-379-3p    |
| ENSMUST00000127786 | miR-682       |
| ENSMUST00000127786 | miR-3080-3p   |
| ENSMUST00000127786 | miR-9-3p      |
| ENSMUST00000127786 | miR-22-3p     |
| ENSMUST00000127786 | miR-185-5p    |
| ENSMUST00000127786 | miR-331-3p    |
| ENSMUST00000127786 | miR-5127      |
| ENSMUST00000127786 | miR-486a-5p   |
| ENSMUST00000127786 | miR-486b-5p   |
| ENSMUST00000127786 | miR-191-5p    |
| ENSMUST00000127786 | miR-125b-5p   |
| ENSMUST00000127786 | miR-679-3p    |
| ENSMUST00000127786 | miR-4661-3p   |
| ENSMUST00000127786 | miR-143-3p    |
| ENSMUST00000127786 | miR-127-3p    |
| ENSMUST00000182231 | miR-191-3p    |
| ENSMUST00000182231 | miR-7236-3p   |
| ENSMUST00000182231 | miR-329-3p    |
| ENSMUST00000182231 | miR-3082-5p   |
| ENSMUST00000182231 | miR-3091-3p   |
| ENSMUST00000182231 | miR-1964-5p   |
| ENSMUST00000182231 | miR-346-5p    |
| ENSMUST00000182231 | miR-331-3p    |
| ENSMUST00000141677 | miR-672-3p    |
| ENSMUST00000141677 | miR-301a-5p   |
| ENSMUST00000141677 | miR-669c-3p   |
| ENSMUST00000141677 | miR-27b-3p    |
| ENSMUST00000141677 | miR-7047-5p   |
| ENSMUST00000141677 | miR-382-3p    |
| ENSMUST00000141677 | miR-128-3p    |
| ENSMUST00000131052 | miR-7019-3p   |

---

---

|                    |               |
|--------------------|---------------|
| ENSMUST00000131052 | miR-760-3p    |
| ENSMUST00000131052 | miR-3470a     |
| ENSMUST00000131052 | miR-7046-3p   |
| ENSMUST00000189564 | miR-3095-3p   |
| ENSMUST00000189564 | miR-335-3p    |
| ENSMUST00000189564 | miR-6540-3p   |
| ENSMUST00000189564 | miR-450b-5p   |
| ENSMUST00000189564 | miR-7235-3p   |
| ENSMUST00000189564 | miR-466f-3p   |
| ENSMUST00000189564 | miR-6925-5p   |
| ENSMUST00000189564 | miR-467f      |
| ENSMUST00000189564 | miR-7668-5p   |
| ENSMUST00000189564 | miR-223-5p    |
| ENSMUST00000189564 | miR-6984-5p   |
| ENSMUST00000189564 | miR-301a-5p   |
| ENSMUST00000189564 | miR-669h-3p   |
| ENSMUST00000189564 | miR-669f-3p   |
| ENSMUST00000189564 | miR-467a-3p   |
| ENSMUST00000189564 | miR-7674-5p   |
| ENSMUST00000189564 | miR-6915-3p   |
| ENSMUST00000189564 | miR-1668      |
| ENSMUST00000189564 | miR-329-5p    |
| ENSMUST00000189564 | miR-3085-3p   |
| ENSMUST00000189564 | miR-3064-5p   |
| ENSMUST00000189564 | miR-1b-3p     |
| ENSMUST00000189564 | miR-874-3p    |
| ENSMUST00000189564 | miR-450b-3p   |
| ENSMUST00000189564 | miR-450a-1-3p |
| ENSMUST00000189564 | miR-323-5p    |
| ENSMUST00000155277 | miR-7231-5p   |
| ENSMUST00000155277 | miR-466n-3p   |
| ENSMUST00000155277 | miR-669c-3p   |
| ENSMUST00000155277 | miR-329-3p    |
| ENSMUST00000155277 | miR-467e-3p   |
| ENSMUST00000155277 | miR-467d-3p   |
| ENSMUST00000155277 | miR-467c-3p   |
| ENSMUST00000155277 | miR-467b-3p   |
| ENSMUST00000155277 | miR-6952-5p   |
| ENSMUST00000155277 | miR-450a-2-3p |
| ENSMUST00000155277 | miR-466e-3p   |
| ENSMUST00000155277 | miR-466d-3p   |
| ENSMUST00000155277 | miR-466a-3p   |
| ENSMUST00000155277 | miR-6399      |
| ENSMUST00000155277 | miR-3084-3p   |

---

---

|                    |             |
|--------------------|-------------|
| ENSMUST00000155277 | miR-6955-5p |
| ENSMUST00000155277 | miR-7084-5p |
| ENSMUST00000155277 | miR-8118    |
| ENSMUST00000155277 | miR-3062-5p |
| ENSMUST00000155277 | miR-7038-5p |
| ENSMUST00000155277 | let-7c-2-3p |
| ENSMUST00000155277 | let-7a-1-3p |
| ENSMUST00000155277 | miR-6946-3p |
| ENSMUST00000155277 | miR-191-3p  |
| ENSMUST00000155277 | miR-3470a   |
| ENSMUST00000155277 | miR-299a-5p |
| ENSMUST00000123670 | miR-186-3p  |
| ENSMUST00000123670 | miR-6963-3p |
| ENSMUST00000123670 | miR-491-5p  |
| ENSMUST00000123670 | miR-7052-3p |
| ENSMUST00000123670 | miR-7051-5p |
| ENSMUST00000150644 | miR-129b-5p |
| ENSMUST00000150644 | miR-7065-3p |
| ENSMUST00000150644 | miR-7077-5p |
| ENSMUST00000150644 | miR-1a-3p   |
| ENSMUST00000150644 | miR-7052-3p |
| ENSMUST00000150644 | miR-7224-3p |
| ENSMUST00000150644 | miR-7651-5p |
| ENSMUST00000150644 | miR-671-5p  |
| ENSMUST00000150644 | miR-496a-5p |
| ENSMUST00000150644 | miR-683     |
| ENSMUST00000150644 | miR-370-3p  |
| ENSMUST00000156420 | miR-6925-5p |
| ENSMUST00000156420 | miR-107-3p  |
| ENSMUST00000156420 | miR-103-3p  |
| ENSMUST00000156420 | miR-7665-5p |
| ENSMUST00000156420 | miR-6976-5p |
| ENSMUST00000156420 | miR-5125    |
| ENSMUST00000156420 | miR-7092-5p |
| ENSMUST00000156420 | miR-466q    |
| ENSMUST00000156420 | miR-7031-5p |
| ENSMUST00000156420 | miR-7027-3p |
| ENSMUST00000156420 | miR-195a-5p |
| ENSMUST00000156420 | miR-15b-5p  |
| ENSMUST00000156420 | miR-704     |
| ENSMUST00000221971 | miR-6975-3p |
| ENSMUST00000221971 | miR-382-3p  |
| ENSMUST00000221971 | miR-320-5p  |
| ENSMUST00000221971 | miR-22-3p   |

---

---

|                    |               |
|--------------------|---------------|
| ENSMUST00000221971 | miR-3475-3p   |
| ENSMUST00000221971 | miR-683       |
| ENSMUST00000221971 | miR-6983-5p   |
| ENSMUST00000221971 | miR-181b-2-3p |
| ENSMUST00000221971 | miR-6946-3p   |
| ENSMUST00000221971 | miR-7047-5p   |
| ENSMUST00000221971 | miR-466e-3p   |
| ENSMUST00000221971 | miR-466d-3p   |
| ENSMUST00000221971 | miR-466a-3p   |
| ENSMUST00000221971 | miR-130b-5p   |
| ENSMUST00000221971 | miR-669p-3p   |
| ENSMUST00000221971 | miR-3103-5p   |
| ENSMUST00000221971 | miR-23b-3p    |
| ENSMUST00000221971 | miR-23a-3p    |
| ENSMUST00000221971 | miR-1943-5p   |
| ENSMUST00000221971 | miR-6546-3p   |
| ENSMUST00000205311 | miR-409-5p    |
| ENSMUST00000205311 | miR-758-5p    |
| ENSMUST00000205311 | miR-6946-3p   |
| ENSMUST00000205311 | miR-339-3p    |
| ENSMUST00000205311 | miR-7085-5p   |
| ENSMUST00000205311 | miR-491-5p    |
| ENSMUST00000205311 | miR-3069-5p   |
| ENSMUST00000205311 | miR-543-3p    |
| ENSMUST00000205311 | miR-148b-3p   |
| ENSMUST00000205311 | miR-669o-5p   |
| ENSMUST00000126335 | miR-379-5p    |
| ENSMUST00000126335 | miR-760-3p    |
| ENSMUST00000126335 | miR-6927-5p   |
| ENSMUST00000126335 | miR-5129-5p   |
| ENSMUST00000126335 | miR-1a-3p     |
| ENSMUST00000126335 | miR-320-5p    |
| ENSMUST00000126335 | miR-92b-5p    |
| ENSMUST00000126335 | miR-5101      |
| ENSMUST00000126335 | miR-491-5p    |
| ENSMUST00000126335 | miR-126a-5p   |
| ENSMUST00000126335 | miR-6516-5p   |
| ENSMUST00000126335 | miR-682       |
| ENSMUST00000126335 | miR-323-5p    |
| ENSMUST00000126335 | miR-7034-5p   |
| ENSMUST00000126335 | miR-712-5p    |
| ENSMUST00000111019 | miR-669f-3p   |
| ENSMUST00000111019 | miR-467a-3p   |
| ENSMUST00000111019 | miR-466e-3p   |

---

---

|                    |             |
|--------------------|-------------|
| ENSMUST00000111019 | miR-466d-3p |
| ENSMUST00000111019 | miR-466a-3p |
| ENSMUST00000111019 | miR-8094    |
| ENSMUST00000111019 | miR-100-3p  |
| ENSMUST00000111019 | miR-335-3p  |
| ENSMUST00000111019 | miR-467e-3p |
| ENSMUST00000111019 | miR-467d-3p |
| ENSMUST00000111019 | miR-467c-3p |
| ENSMUST00000111019 | miR-467b-3p |
| ENSMUST00000111019 | miR-6948-5p |
| ENSMUST00000111019 | miR-212-5p  |
| ENSMUST00000111019 | miR-384-5p  |
| ENSMUST00000111019 | miR-30d-5p  |
| ENSMUST00000111019 | miR-30c-5p  |
| ENSMUST00000111019 | miR-6946-3p |
| ENSMUST00000111019 | miR-6908-3p |
| ENSMUST00000111019 | miR-7a-1-3p |
| ENSMUST00000111019 | miR-686     |
| ENSMUST00000111019 | miR-344h-3p |
| ENSMUST00000111019 | miR-3965    |
| ENSMUST00000111019 | miR-3087-3p |
| ENSMUST00000160318 | miR-671-3p  |
| ENSMUST00000160318 | miR-7b-5p   |
| ENSMUST00000160318 | miR-7a-5p   |
| ENSMUST00000160318 | miR-3083-3p |
| ENSMUST00000148373 | miR-6971-3p |
| ENSMUST00000148373 | miR-370-3p  |
| ENSMUST00000148373 | miR-5134-5p |
| ENSMUST00000148373 | miR-3099-5p |
| ENSMUST00000148373 | miR-3473e   |
| ENSMUST00000148373 | miR-3473b   |
| ENSMUST00000148373 | miR-484     |
| ENSMUST00000148373 | miR-7062-5p |
| ENSMUST00000205779 | miR-1194    |
| ENSMUST00000205779 | miR-6946-3p |
| ENSMUST00000205779 | miR-505-3p  |
| ENSMUST00000205779 | miR-3965    |
| ENSMUST00000205779 | miR-7064-3p |
| ENSMUST00000205779 | miR-3065-5p |
| ENSMUST00000205779 | miR-669c-3p |
| ENSMUST00000205779 | miR-692     |
| ENSMUST00000205779 | miR-3057-3p |
| ENSMUST00000205779 | miR-5615-5p |
| ENSMUST00000205779 | miR-186-5p  |

---

---

|                    |                  |
|--------------------|------------------|
| ENSMUST00000205779 | miR-686          |
| ENSMUST00000145025 | miR-504-3p       |
| ENSMUST00000145025 | miR-3099-5p      |
| ENSMUST00000145025 | miR-29b-1-5p     |
| ENSMUST00000145025 | miR-7084-5p      |
| ENSMUST00000145025 | miR-23b-3p       |
| ENSMUST00000145025 | miR-23a-3p       |
| ENSMUST00000145025 | miR-1948-3p      |
| ENSMUST00000145025 | miR-6537-3p      |
| ENSMUST00000145025 | miR-7073-5p      |
| ENSMUST00000145025 | miR-6958-3p      |
| MSTRG.10455.14     | miR-7054-5p      |
| MSTRG.10455.14     | miR-6999-5p      |
| MSTRG.10455.14     | miR-466k         |
| MSTRG.10455.14     | miR-153-5p       |
| MSTRG.10455.14     | miR-6903-3p      |
| MSTRG.10455.14     | miR-551b-5p      |
| MSTRG.10455.14     | miR-1954         |
| MSTRG.10455.14     | miR-5123         |
| MSTRG.10455.14     | miR-30f          |
| MSTRG.10455.14     | miR-701-3p       |
| MSTRG.10455.14     | miR-7092-3p      |
| MSTRG.10455.14     | miR-7081-3p      |
| MSTRG.10455.14     | miR-1961         |
| MSTRG.10455.14     | miR-335-3p       |
| MSTRG.10455.14     | miR-7685-5p      |
| MSTRG.10455.14     | miR-669c-3p      |
| MSTRG.10455.14     | miR-6975-3p      |
| MSTRG.10455.14     | miR-6915-3p      |
| MSTRG.10455.14     | miR-384-3p       |
| MSTRG.10455.14     | miR-547-3p       |
| MSTRG.10455.14     | miR-3102-5p.2-5p |
| MSTRG.10455.14     | miR-466e-3p      |
| MSTRG.10455.14     | miR-466d-3p      |
| MSTRG.10455.14     | miR-466a-3p      |
| MSTRG.10455.14     | miR-3569-3p      |
| MSTRG.10455.14     | miR-203-3p       |
| MSTRG.10455.14     | miR-320-5p       |
| MSTRG.10455.14     | miR-3069-5p      |
| MSTRG.10455.14     | miR-412-3p       |
| MSTRG.10455.14     | miR-1983         |
| MSTRG.10455.14     | miR-7013-5p      |
| MSTRG.10455.14     | miR-7668-5p      |
| MSTRG.10455.14     | miR-7a-1-3p      |

---

---

|                |             |
|----------------|-------------|
| MSTRG.10455.14 | miR-126a-5p |
| MSTRG.10455.14 | miR-322-3p  |
| MSTRG.10455.14 | miR-3089-5p |
| MSTRG.10455.14 | miR-6970-5p |
| MSTRG.10455.14 | miR-466n-3p |
| MSTRG.10455.14 | miR-98-5p   |
| MSTRG.10455.14 | let-7i-5p   |
| MSTRG.10455.14 | let-7g-5p   |
| MSTRG.10455.14 | let-7f-5p   |
| MSTRG.10455.14 | let-7e-5p   |
| MSTRG.10455.14 | let-7a-5p   |
| MSTRG.10455.14 | let-7d-5p   |
| MSTRG.10455.14 | miR-3057-3p |
| MSTRG.10455.14 | miR-3094-3p |
| MSTRG.10455.14 | miR-504-3p  |
| MSTRG.10455.14 | miR-3572-3p |
| MSTRG.10455.14 | miR-148b-5p |
| MSTRG.10455.14 | miR-6516-3p |
| MSTRG.10455.14 | let-7f-2-3p |
| MSTRG.10455.14 | miR-712-5p  |
| MSTRG.10455.14 | miR-1298-5p |
| MSTRG.10455.14 | miR-6916-3p |
| MSTRG.10455.14 | miR-6946-3p |
| MSTRG.10455.14 | miR-467e-3p |
| MSTRG.10455.14 | miR-467d-3p |
| MSTRG.10455.14 | miR-467c-3p |
| MSTRG.10455.14 | miR-467b-3p |
| MSTRG.10455.14 | miR-6948-5p |
| MSTRG.10455.14 | miR-222-3p  |
| MSTRG.10455.14 | miR-221-3p  |
| MSTRG.10455.14 | let-7c-2-3p |
| MSTRG.10455.14 | let-7a-1-3p |
| MSTRG.10455.14 | miR-6984-5p |
| MSTRG.10455.14 | miR-466l-3p |
| MSTRG.10455.14 | let-7j      |
| MSTRG.10455.14 | miR-488-5p  |
| MSTRG.10455.14 | miR-6984-3p |
| MSTRG.10455.14 | miR-6947-5p |
| MSTRG.10455.14 | miR-686     |
| MSTRG.10455.14 | miR-669p-3p |
| MSTRG.10455.14 | miR-6537-3p |
| MSTRG.10455.14 | miR-204-5p  |
| MSTRG.10455.14 | miR-7116-5p |
| MSTRG.10455.14 | miR-344h-5p |

---



---

|                |              |
|----------------|--------------|
| MSTRG.10455.14 | miR-344e-5p  |
| MSTRG.10455.14 | miR-325-3p   |
| MSTRG.10455.14 | miR-1195     |
| MSTRG.10455.14 | miR-694      |
| MSTRG.10455.14 | miR-7038-5p  |
| MSTRG.10455.14 | miR-669h-3p  |
| MSTRG.10455.14 | miR-6238     |
| MSTRG.10455.14 | miR-669f-3p  |
| MSTRG.10455.14 | miR-467a-3p  |
| MSTRG.10455.14 | miR-6240     |
| MSTRG.10455.14 | miR-330-3p   |
| MSTRG.10455.14 | miR-338-5p   |
| MSTRG.10455.14 | miR-194-5p   |
| MSTRG.11359.1  | miR-7667-3p  |
| MSTRG.11359.1  | miR-365-2-5p |
| MSTRG.11359.1  | miR-365-1-5p |
| MSTRG.15393.1  | miR-669c-3p  |
| MSTRG.15393.1  | miR-495-3p   |
| MSTRG.15393.1  | miR-3103-3p  |
| MSTRG.15393.1  | miR-8118     |
| MSTRG.15393.1  | miR-466l-3p  |
| MSTRG.15393.1  | miR-6908-5p  |
| MSTRG.15393.1  | miR-466i-3p  |
| MSTRG.15393.1  | miR-8106     |
| MSTRG.15393.1  | miR-3091-3p  |
| MSTRG.15393.1  | miR-694      |
| MSTRG.15393.1  | miR-664-3p   |
| MSTRG.15393.1  | miR-31-5p    |
| MSTRG.15393.1  | miR-7069-5p  |
| MSTRG.15393.1  | miR-423-5p   |
| MSTRG.15393.1  | miR-5114     |
| MSTRG.15393.1  | miR-1195     |
| MSTRG.15393.1  | miR-1933-5p  |
| MSTRG.15393.1  | miR-7668-5p  |
| MSTRG.17500.2  | miR-669c-3p  |
| MSTRG.17500.2  | miR-466k     |
| MSTRG.17500.2  | miR-6903-3p  |
| MSTRG.17500.2  | miR-7116-3p  |
| MSTRG.17500.2  | miR-223-5p   |
| MSTRG.17500.2  | miR-1187     |
| MSTRG.17500.2  | miR-466p-5p  |
| MSTRG.17500.2  | miR-466a-5p  |
| MSTRG.17500.2  | miR-466e-5p  |
| MSTRG.17500.2  | miR-466o-3p  |

---

---

|               |              |
|---------------|--------------|
| MSTRG.17500.2 | miR-466m-3p  |
| MSTRG.17500.2 | miR-7116-5p  |
| MSTRG.17500.2 | miR-466l-3p  |
| MSTRG.17500.2 | miR-5125     |
| MSTRG.17500.2 | miR-7117-5p  |
| MSTRG.17500.2 | miR-3473e    |
| MSTRG.17500.2 | miR-3473b    |
| MSTRG.17500.2 | miR-6944-3p  |
| MSTRG.17500.2 | miR-3083-5p  |
| MSTRG.17500.2 | miR-7240-5p  |
| MSTRG.17500.2 | miR-5101     |
| MSTRG.17500.2 | miR-672-3p   |
| MSTRG.17500.2 | miR-7073-5p  |
| MSTRG.17500.2 | miR-185-5p   |
| MSTRG.17500.2 | miR-468-5p   |
| MSTRG.17500.2 | miR-6948-5p  |
| MSTRG.17500.2 | miR-7013-5p  |
| MSTRG.17500.2 | miR-466e-3p  |
| MSTRG.17500.2 | miR-466d-3p  |
| MSTRG.17500.2 | miR-466a-3p  |
| MSTRG.17500.2 | miR-7664-3p  |
| MSTRG.17500.2 | miR-467e-3p  |
| MSTRG.17500.2 | miR-467d-3p  |
| MSTRG.17500.2 | miR-467c-3p  |
| MSTRG.17500.2 | miR-467b-3p  |
| MSTRG.17500.2 | miR-664-5p   |
| MSTRG.17500.2 | miR-204-3p   |
| MSTRG.17500.2 | miR-145a-3p  |
| MSTRG.17500.2 | miR-1954     |
| MSTRG.17500.2 | miR-1194     |
| MSTRG.17500.2 | miR-654-3p   |
| MSTRG.17500.2 | miR-6975-3p  |
| MSTRG.17500.2 | miR-331-3p   |
| MSTRG.17500.2 | miR-5124b    |
| MSTRG.17500.2 | miR-24-3p    |
| MSTRG.17500.2 | miR-6998-3p  |
| MSTRG.17500.2 | miR-1198-5p  |
| MSTRG.17500.2 | miR-365-2-5p |
| MSTRG.17500.2 | miR-365-1-5p |
| MSTRG.17500.2 | miR-6908-5p  |
| MSTRG.17500.2 | miR-511-3p   |
| MSTRG.17500.2 | miR-539-5p   |
| MSTRG.17500.2 | miR-139-5p   |
| MSTRG.17500.2 | miR-450b-5p  |

---

---

|               |               |
|---------------|---------------|
| MSTRG.17500.2 | miR-6964-3p   |
| MSTRG.17500.2 | miR-342-3p    |
| MSTRG.17500.2 | miR-344g-5p   |
| MSTRG.17500.2 | miR-344d-3-5p |
| MSTRG.17500.2 | miR-344d-1-5p |
| MSTRG.17500.2 | miR-344c-5p   |
| MSTRG.17500.2 | miR-344-5p    |
| MSTRG.17500.2 | miR-466i-3p   |
| MSTRG.17500.2 | miR-3087-3p   |
| MSTRG.17500.2 | miR-181d-3p   |
| MSTRG.17500.2 | miR-7231-5p   |
| MSTRG.17500.2 | miR-6516-3p   |
| MSTRG.17500.2 | miR-21b       |
| MSTRG.17500.2 | miR-5626-3p   |
| MSTRG.17500.2 | miR-363-5p    |
| MSTRG.17500.2 | miR-204-5p    |
| MSTRG.17500.2 | miR-6402      |
| MSTRG.17500.2 | miR-208a-5p   |
| MSTRG.17500.2 | miR-7008-3p   |
| MSTRG.17500.2 | miR-1964-5p   |
| MSTRG.17500.2 | miR-1961      |
| MSTRG.17500.2 | miR-6946-3p   |
| MSTRG.17500.2 | miR-3099-5p   |
| MSTRG.17500.2 | miR-7026-5p   |
| MSTRG.17500.2 | miR-185-3p    |
| MSTRG.17500.2 | miR-7000-5p   |
| MSTRG.17500.2 | miR-433-5p    |
| MSTRG.17500.2 | miR-683       |
| MSTRG.17500.2 | miR-6900-3p   |
| MSTRG.17500.2 | miR-195a-3p   |
| MSTRG.17500.2 | miR-532-5p    |
| MSTRG.17500.2 | miR-466q      |
| MSTRG.17500.2 | miR-7663-3p   |
| MSTRG.17500.2 | miR-466n-3p   |
| MSTRG.17500.2 | miR-694       |
| MSTRG.17500.2 | miR-7667-3p   |
| MSTRG.17500.2 | miR-338-5p    |
| MSTRG.17500.2 | miR-129b-5p   |
| MSTRG.17500.2 | miR-301a-5p   |
| MSTRG.17500.2 | miR-145a-5p   |
| MSTRG.17500.2 | miR-7686-5p   |
| MSTRG.17500.2 | miR-3094-5p   |
| MSTRG.17500.2 | miR-3065-5p   |
| MSTRG.17500.2 | miR-450a-2-3p |

---

---

|               |               |
|---------------|---------------|
| MSTRG.17500.2 | miR-7031-5p   |
| MSTRG.17500.2 | miR-323-5p    |
| MSTRG.17500.2 | miR-3074-5p   |
| MSTRG.17500.2 | miR-7052-3p   |
| MSTRG.17500.2 | miR-466p-3p   |
| MSTRG.17500.2 | miR-466c-3p   |
| MSTRG.17500.2 | miR-466b-3p   |
| MSTRG.17500.2 | miR-7063-5p   |
| MSTRG.17500.2 | miR-329-3p    |
| MSTRG.17500.2 | miR-6958-3p   |
| MSTRG.17500.2 | miR-1929-3p   |
| MSTRG.17500.2 | miR-1193-3p   |
| MSTRG.17500.2 | miR-7084-5p   |
| MSTRG.17500.2 | miR-466f-3p   |
| MSTRG.17500.2 | miR-7015-3p   |
| MSTRG.17500.2 | miR-493-5p    |
| MSTRG.17500.2 | miR-551b-5p   |
| MSTRG.17500.2 | miR-433-3p    |
| MSTRG.17500.2 | miR-1943-5p   |
| MSTRG.17500.2 | miR-5615-5p   |
| MSTRG.17500.2 | miR-7065-3p   |
| MSTRG.17500.2 | miR-706       |
| MSTRG.17500.2 | miR-222-5p    |
| MSTRG.17500.2 | miR-3085-3p   |
| MSTRG.17500.2 | miR-3064-5p   |
| MSTRG.17500.2 | miR-130b-5p   |
| MSTRG.17500.2 | miR-5127      |
| MSTRG.17500.2 | miR-195a-5p   |
| MSTRG.17500.2 | miR-15b-5p    |
| MSTRG.17500.2 | miR-98-5p     |
| MSTRG.17500.2 | let-7i-5p     |
| MSTRG.17500.2 | let-7g-5p     |
| MSTRG.17500.2 | let-7f-5p     |
| MSTRG.17500.2 | let-7e-5p     |
| MSTRG.17500.2 | let-7a-5p     |
| MSTRG.17500.2 | miR-148b-3p   |
| MSTRG.17500.2 | miR-669a-3-3p |
| MSTRG.17500.2 | miR-7685-5p   |
| MSTRG.17500.2 | miR-3094-3p   |
| MSTRG.17500.2 | miR-3095-5p   |
| MSTRG.17500.2 | miR-1941-3p   |
| MSTRG.17500.2 | miR-1983      |
| MSTRG.17500.2 | miR-686       |
| MSTRG.17500.2 | miR-488-5p    |

---

---

|               |              |
|---------------|--------------|
| MSTRG.17500.2 | miR-5114     |
| MSTRG.17500.2 | miR-212-3p   |
| MSTRG.17500.2 | miR-132-3p   |
| MSTRG.17500.2 | miR-412-3p   |
| MSTRG.17500.2 | miR-7085-3p  |
| MSTRG.17500.2 | miR-669h-3p  |
| MSTRG.17500.2 | miR-877-5p   |
| MSTRG.17500.2 | miR-8106     |
| MSTRG.17500.2 | miR-3066-3p  |
| MSTRG.17500.2 | miR-365-3p   |
| MSTRG.17500.2 | miR-7077-5p  |
| MSTRG.17500.2 | miR-7689-3p  |
| MSTRG.17500.2 | miR-6901-3p  |
| MSTRG.17500.2 | miR-3084-3p  |
| MSTRG.17500.2 | miR-692      |
| MSTRG.17500.2 | miR-6948-3p  |
| MSTRG.17500.2 | miR-7026-3p  |
| MSTRG.17500.2 | miR-324-3p   |
| MSTRG.17500.2 | miR-384-3p   |
| MSTRG.17500.2 | miR-3100-5p  |
| MSTRG.17500.2 | miR-377-5p   |
| MSTRG.17500.2 | miR-693-5p   |
| MSTRG.17500.2 | let-7d-5p    |
| MSTRG.17500.2 | miR-7055-3p  |
| MSTRG.17500.2 | miR-6540-3p  |
| MSTRG.17500.2 | miR-370-5p   |
| MSTRG.17500.2 | miR-1b-3p    |
| MSTRG.17500.2 | miR-6909-5p  |
| MSTRG.17500.2 | miR-770-3p   |
| MSTRG.17500.2 | miR-7656-5p  |
| MSTRG.17500.2 | miR-6769b-5p |
| MSTRG.17500.2 | miR-1894-5p  |
| MSTRG.17500.2 | miR-30e-3p   |
| MSTRG.17500.2 | miR-30a-3p   |
| MSTRG.17500.2 | let-7j       |
| MSTRG.17500.2 | miR-6962-5p  |
| MSTRG.17500.2 | miR-504-5p   |
| MSTRG.17500.2 | miR-3057-3p  |
| MSTRG.17500.2 | miR-873a-3p  |
| MSTRG.17500.2 | miR-6998-5p  |
| MSTRG.17500.2 | miR-346-5p   |
| MSTRG.17500.2 | miR-361-3p   |
| MSTRG.17500.2 | miR-7661-3p  |
| MSTRG.17500.2 | miR-3099-3p  |

---

---

|                |             |
|----------------|-------------|
| MSTRG.17500.2  | miR-674-5p  |
| MSTRG.17500.2  | miR-701-3p  |
| MSTRG.17500.2  | miR-186-5p  |
| MSTRG.17500.2  | miR-7674-5p |
| MSTRG.17500.2  | miR-5710    |
| MSTRG.12843.10 | miR-669c-3p |
| MSTRG.12843.10 | miR-466k    |
| MSTRG.12843.10 | miR-5101    |
| MSTRG.12843.10 | miR-7116-3p |
| MSTRG.12843.10 | miR-3065-5p |
| MSTRG.12843.10 | miR-6903-3p |
| MSTRG.12843.10 | miR-466l-3p |
| MSTRG.12843.10 | miR-30f     |
| MSTRG.12843.10 | miR-203-3p  |
| MSTRG.12843.10 | miR-7685-5p |
| MSTRG.12843.10 | miR-467f    |
| MSTRG.12843.10 | miR-7013-5p |
| MSTRG.12843.10 | miR-7061-5p |
| MSTRG.12843.10 | miR-6916-3p |
| MSTRG.12843.10 | miR-466q    |
| MSTRG.12843.10 | miR-7065-5p |
| MSTRG.12843.10 | miR-20b-5p  |
| MSTRG.12843.10 | miR-186-5p  |
| MSTRG.12843.10 | miR-495-3p  |
| MSTRG.12843.10 | miR-338-5p  |
| MSTRG.12843.10 | miR-382-3p  |
| MSTRG.12843.10 | miR-8118    |
| MSTRG.12843.10 | miR-7a-1-3p |
| MSTRG.12843.10 | miR-7009-5p |
| MSTRG.12843.10 | miR-7047-5p |
| MSTRG.12843.10 | miR-551b-5p |
| MSTRG.12843.10 | miR-6946-3p |
| MSTRG.12843.10 | miR-1929-3p |
| MSTRG.12843.10 | miR-7092-3p |
| MSTRG.12843.10 | miR-6240    |
| MSTRG.12843.10 | miR-330-3p  |
| MSTRG.12843.10 | miR-335-3p  |
| MSTRG.12843.10 | miR-3103-5p |
| MSTRG.12843.10 | miR-1894-5p |
| MSTRG.12843.10 | miR-712-5p  |
| MSTRG.12843.10 | miR-664-3p  |
| MSTRG.12843.10 | miR-6975-3p |
| MSTRG.12843.10 | miR-494-3p  |
| MSTRG.12843.10 | miR-6996-5p |

---

---

|                |               |
|----------------|---------------|
| MSTRG.12843.10 | miR-669f-3p   |
| MSTRG.12843.10 | miR-467a-3p   |
| MSTRG.12843.10 | miR-379-5p    |
| MSTRG.12843.10 | miR-692       |
| MSTRG.12843.10 | miR-7075-3p   |
| MSTRG.12843.10 | miR-223-5p    |
| MSTRG.12843.10 | miR-3470a     |
| MSTRG.12843.10 | miR-1843a-5p  |
| MSTRG.12843.10 | miR-325-3p    |
| MSTRG.12843.10 | miR-467e-3p   |
| MSTRG.12843.10 | miR-467d-3p   |
| MSTRG.12843.10 | miR-467c-3p   |
| MSTRG.12843.10 | miR-467b-3p   |
| MSTRG.12843.10 | miR-138-2-3p  |
| MSTRG.12843.10 | let-7c-2-3p   |
| MSTRG.12843.10 | let-7a-1-3p   |
| MSTRG.12843.10 | miR-1961      |
| MSTRG.12843.10 | miR-126a-5p   |
| MSTRG.12843.10 | miR-3066-3p   |
| MSTRG.12843.10 | miR-129b-5p   |
| MSTRG.12843.10 | miR-7008-3p   |
| MSTRG.12843.10 | miR-6944-3p   |
| MSTRG.12843.10 | miR-6948-5p   |
| MSTRG.12843.10 | miR-466f-3p   |
| MSTRG.12843.10 | miR-26b-3p    |
| MSTRG.12843.10 | miR-26a-2-3p  |
| MSTRG.12843.10 | miR-7686-5p   |
| MSTRG.12843.10 | miR-682       |
| MSTRG.12843.10 | miR-3572-3p   |
| MSTRG.12843.10 | miR-6915-3p   |
| MSTRG.12843.10 | miR-7b-5p     |
| MSTRG.12843.10 | miR-7a-5p     |
| MSTRG.12843.10 | miR-8094      |
| MSTRG.12843.10 | miR-466e-3p   |
| MSTRG.12843.10 | miR-466d-3p   |
| MSTRG.12843.10 | miR-466a-3p   |
| MSTRG.12843.10 | miR-26a-1-3p  |
| MSTRG.12843.10 | miR-450b-3p   |
| MSTRG.12843.10 | miR-450a-1-3p |
| MSTRG.12843.10 | miR-6964-3p   |
| MSTRG.12843.10 | miR-448-3p    |
| MSTRG.12843.10 | miR-6540-3p   |
| MSTRG.12843.10 | miR-148b-3p   |
| MSTRG.12843.10 | miR-301a-5p   |

---

---

|                |             |
|----------------|-------------|
| MSTRG.12843.10 | miR-505-3p  |
| MSTRG.12843.10 | miR-153-5p  |
| MSTRG.12843.10 | miR-145a-5p |
| MSTRG.12843.10 | miR-6982-5p |
| MSTRG.12843.10 | miR-28a-3p  |
| MSTRG.12843.10 | miR-872-3p  |
| MSTRG.12843.10 | miR-6963-3p |
| MSTRG.12843.10 | miR-7027-5p |
| MSTRG.12843.10 | miR-486b-5p |
| MSTRG.12843.10 | miR-486a-5p |
| MSTRG.12843.10 | miR-1955-3p |
| MSTRG.12843.10 | miR-6984-3p |
| MSTRG.12843.10 | miR-6925-5p |
| MSTRG.12843.10 | miR-5710    |
| MSTRG.12843.10 | miR-421-3p  |
| MSTRG.12843.10 | let-7f-2-3p |
| MSTRG.12843.10 | miR-3113-5p |
| MSTRG.12843.10 | miR-7650-5p |
| MSTRG.12843.10 | miR-669d-5p |
| MSTRG.12843.10 | miR-7010-5p |
| MSTRG.12843.10 | miR-1264-3p |
| MSTRG.12843.10 | miR-667-5p  |
| MSTRG.12843.10 | miR-320-3p  |
| MSTRG.12843.10 | miR-130b-5p |
| MSTRG.12843.10 | miR-7667-5p |
| MSTRG.12843.10 | miR-383-5p  |
| MSTRG.12843.10 | miR-222-3p  |
| MSTRG.12843.10 | miR-221-3p  |
| MSTRG.12843.10 | miR-6922-3p |
| MSTRG.12843.10 | let-7e-5p   |
| MSTRG.12843.10 | let-7a-5p   |
| MSTRG.12843.10 | miR-539-5p  |
| MSTRG.12843.10 | miR-185-5p  |
| MSTRG.12843.10 | miR-3535    |
| MSTRG.12843.10 | miR-8106    |
| MSTRG.12843.10 | miR-686     |
| MSTRG.12843.10 | miR-504-3p  |
| MSTRG.12843.10 | miR-7019-3p |
| MSTRG.12843.10 | miR-6933-3p |
| MSTRG.12843.10 | miR-3474    |
| MSTRG.12843.10 | miR-7051-5p |
| MSTRG.12843.10 | miR-1298-5p |
| MSTRG.12843.10 | miR-706     |
| MSTRG.12843.10 | miR-5125    |

---



---

|                |                  |
|----------------|------------------|
| MSTRG.12843.10 | miR-466n-3p      |
| MSTRG.12843.10 | miR-669i         |
| MSTRG.12843.10 | miR-299a-5p      |
| MSTRG.12843.10 | miR-3100-5p      |
| MSTRG.12843.10 | miR-3064-5p      |
| MSTRG.12843.10 | miR-208a-5p      |
| MSTRG.12843.10 | miR-98-5p        |
| MSTRG.12843.10 | let-7i-5p        |
| MSTRG.12843.10 | let-7g-5p        |
| MSTRG.12843.10 | let-7f-5p        |
| MSTRG.12843.10 | let-7d-5p        |
| MSTRG.12843.10 | miR-3087-3p      |
| MSTRG.12843.10 | miR-329-3p       |
| MSTRG.12843.10 | miR-27b-3p       |
| MSTRG.12843.10 | miR-195a-3p      |
| MSTRG.12843.10 | miR-6998-5p      |
| MSTRG.12843.10 | miR-23b-3p       |
| MSTRG.12843.10 | miR-23a-3p       |
| MSTRG.12843.10 | miR-1943-5p      |
| MSTRG.12843.10 | miR-1224-5p      |
| MSTRG.12843.10 | miR-701-3p       |
| MSTRG.12843.10 | miR-3102-5p.2-5p |
| MSTRG.12843.10 | miR-664-5p       |
| MSTRG.12843.10 | miR-7661-3p      |
| MSTRG.12843.10 | miR-212-5p       |
| MSTRG.12843.10 | miR-6997-5p      |
| MSTRG.12843.10 | miR-547-3p       |
| MSTRG.12843.10 | miR-7665-5p      |
| MSTRG.12843.10 | miR-6976-5p      |
| MSTRG.12843.10 | miR-193a-5p      |
| MSTRG.12843.10 | miR-433-3p       |
| MSTRG.12843.10 | miR-532-5p       |
| MSTRG.12843.10 | miR-674-3p       |
| MSTRG.12843.10 | miR-181b-2-3p    |
| MSTRG.12843.10 | miR-28a-5p       |
| MSTRG.12843.10 | miR-1954         |
| MSTRG.12843.10 | miR-7213-3p      |
| MSTRG.12843.10 | miR-694          |
| MSTRG.12843.10 | miR-6983-5p      |
| MSTRG.12843.10 | miR-216b-3p      |
| MSTRG.12843.10 | miR-6973b-3p     |
| MSTRG.12843.10 | miR-431-5p       |
| MSTRG.12843.10 | miR-185-3p       |
| MSTRG.12843.10 | miR-384-5p       |

---

---

|                |               |
|----------------|---------------|
| MSTRG.12843.10 | miR-30d-5p    |
| MSTRG.12843.10 | miR-30c-5p    |
| MSTRG.12843.10 | miR-3105-3p   |
| MSTRG.12843.10 | miR-683       |
| MSTRG.12843.10 | miR-30b-3p    |
| MSTRG.12843.10 | miR-669o-5p   |
| MSTRG.12843.10 | miR-3060-3p   |
| MSTRG.12843.10 | miR-873a-3p   |
| MSTRG.12843.10 | miR-302b-3p   |
| MSTRG.12843.10 | miR-190b-5p   |
| MSTRG.12843.10 | miR-345-3p    |
| MSTRG.12843.10 | miR-1187      |
| MSTRG.12843.10 | miR-7116-5p   |
| MSTRG.12843.10 | miR-7a-2-3p   |
| MSTRG.12843.10 | miR-411-3p    |
| MSTRG.12843.10 | miR-379-3p    |
| MSTRG.12843.10 | miR-760-3p    |
| MSTRG.12843.10 | miR-219a-1-3p |
| MSTRG.12843.10 | miR-1941-3p   |
| MSTRG.12843.10 | miR-449c-3p   |
| MSTRG.12843.10 | miR-511-3p    |
| MSTRG.12843.10 | miR-1981-3p   |
| MSTRG.12843.10 | miR-410-3p    |
| MSTRG.12843.10 | miR-344d-3p   |
| MSTRG.12843.10 | miR-3094-3p   |
| MSTRG.16327.2  | miR-466k      |
| MSTRG.16327.2  | miR-6903-3p   |
| MSTRG.16327.2  | miR-28c       |
| MSTRG.16327.2  | miR-23b-3p    |
| MSTRG.16327.2  | miR-23a-3p    |
| MSTRG.16327.2  | miR-1930-3p   |
| MSTRG.16327.2  | miR-143-5p    |
| MSTRG.16327.2  | miR-5621-5p   |
| MSTRG.16327.2  | miR-30f       |
| MSTRG.16327.2  | miR-7651-5p   |
| MSTRG.16327.2  | miR-5710      |
| MSTRG.16327.2  | miR-1964-5p   |
| MSTRG.3640.2   | miR-466k      |
| MSTRG.3640.2   | miR-5101      |
| MSTRG.3640.2   | miR-6903-3p   |
| MSTRG.3640.2   | miR-7116-3p   |
| MSTRG.3640.2   | miR-466l-3p   |
| MSTRG.3640.2   | miR-346-5p    |
| MSTRG.3640.2   | miR-3094-3p   |

---

---

|              |              |
|--------------|--------------|
| MSTRG.3640.2 | miR-30e-3p   |
| MSTRG.3640.2 | miR-30a-3p   |
| MSTRG.3640.2 | miR-5615-5p  |
| MSTRG.3640.2 | miR-6946-3p  |
| MSTRG.3640.2 | miR-551b-5p  |
| MSTRG.3640.2 | miR-694      |
| MSTRG.3640.2 | miR-7116-5p  |
| MSTRG.3640.2 | miR-335-3p   |
| MSTRG.3640.2 | miR-130b-5p  |
| MSTRG.3640.2 | miR-7065-3p  |
| MSTRG.3640.2 | miR-376b-5p  |
| MSTRG.3640.2 | miR-27b-3p   |
| MSTRG.3640.2 | miR-6913-3p  |
| MSTRG.3640.2 | miR-664-3p   |
| MSTRG.3640.2 | miR-494-3p   |
| MSTRG.3640.2 | miR-6915-3p  |
| MSTRG.3640.2 | miR-692      |
| MSTRG.3640.2 | miR-7046-3p  |
| MSTRG.3640.2 | miR-3074-5p  |
| MSTRG.3640.2 | miR-21b      |
| MSTRG.3640.2 | miR-7a-1-3p  |
| MSTRG.3640.2 | miR-7026-5p  |
| MSTRG.3640.2 | miR-511-3p   |
| MSTRG.3640.2 | miR-433-3p   |
| MSTRG.3640.2 | miR-145a-3p  |
| MSTRG.3640.2 | miR-411-3p   |
| MSTRG.3640.2 | miR-379-3p   |
| MSTRG.3640.2 | miR-6999-5p  |
| MSTRG.3640.2 | miR-3065-5p  |
| MSTRG.3640.2 | miR-7054-5p  |
| MSTRG.3640.2 | miR-186-5p   |
| MSTRG.3640.2 | miR-466n-3p  |
| MSTRG.3640.2 | miR-1981-3p  |
| MSTRG.3640.2 | miR-412-3p   |
| MSTRG.3640.2 | miR-7092-3p  |
| MSTRG.3640.2 | miR-6975-3p  |
| MSTRG.3640.2 | let-7c-2-3p  |
| MSTRG.3640.2 | let-7a-1-3p  |
| MSTRG.3640.2 | miR-1983     |
| MSTRG.3640.2 | miR-1954     |
| MSTRG.3640.2 | miR-7055-5p  |
| MSTRG.3640.2 | miR-669f-3p  |
| MSTRG.3640.2 | miR-467a-3p  |
| MSTRG.3640.2 | miR-194-2-3p |

---

---

|              |              |
|--------------|--------------|
| MSTRG.3640.2 | miR-1198-5p  |
| MSTRG.3640.2 | miR-1264-3p  |
| MSTRG.3640.2 | miR-6900-3p  |
| MSTRG.3640.2 | miR-466o-3p  |
| MSTRG.3640.2 | miR-466m-3p  |
| MSTRG.3640.2 | miR-3094-5p  |
| MSTRG.3640.2 | miR-1930-3p  |
| MSTRG.3640.2 | miR-143-5p   |
| MSTRG.3640.2 | miR-6932-5p  |
| MSTRG.3640.2 | miR-672-3p   |
| MSTRG.3640.2 | miR-1894-5p  |
| MSTRG.3640.2 | miR-6769b-3p |
| MSTRG.3640.2 | miR-8118     |
| MSTRG.3640.2 | miR-676-5p   |
| MSTRG.3640.2 | miR-223-5p   |
| MSTRG.3640.2 | miR-219c-3p  |
| MSTRG.3640.2 | miR-29b-2-5p |
| MSTRG.3640.2 | miR-1194     |
| MSTRG.3640.2 | miR-686      |
| MSTRG.3640.2 | miR-382-3p   |
| MSTRG.3640.2 | miR-344h-5p  |
| MSTRG.3640.2 | miR-344e-5p  |
| MSTRG.3640.2 | miR-6944-3p  |
| MSTRG.3640.2 | miR-3470a    |
| MSTRG.3640.2 | miR-6925-5p  |
| MSTRG.3640.2 | miR-6240     |
| MSTRG.3640.2 | miR-504-3p   |
| MSTRG.3640.2 | miR-330-3p   |
| MSTRG.3640.2 | miR-466e-3p  |
| MSTRG.3640.2 | miR-466d-3p  |
| MSTRG.3640.2 | miR-466a-3p  |
| MSTRG.3640.2 | miR-539-5p   |
| MSTRG.3640.2 | miR-409-3p   |
| MSTRG.3640.2 | miR-6901-3p  |
| MSTRG.3640.2 | miR-361-5p   |
| MSTRG.3640.2 | miR-532-3p   |
| MSTRG.3640.2 | miR-466p-5p  |
| MSTRG.3640.2 | miR-466a-5p  |
| MSTRG.3640.2 | miR-1187     |
| MSTRG.3640.2 | miR-7013-5p  |
| MSTRG.3640.2 | miR-3092-3p  |
| MSTRG.3640.2 | miR-6516-3p  |
| MSTRG.3640.2 | miR-3062-5p  |
| MSTRG.3640.2 | miR-129-5p   |

---

---

|              |              |
|--------------|--------------|
| MSTRG.3640.2 | miR-712-5p   |
| MSTRG.3640.2 | miR-128-3p   |
| MSTRG.3640.2 | miR-7667-3p  |
| MSTRG.3640.2 | miR-30c-2-3p |
| MSTRG.3640.2 | miR-30c-1-3p |
| MSTRG.3640.2 | miR-322-3p   |
| MSTRG.3640.2 | miR-466e-5p  |
| MSTRG.3640.2 | miR-222-5p   |
| MSTRG.3640.2 | miR-7685-3p  |
| MSTRG.3640.2 | miR-410-3p   |
| MSTRG.3640.2 | miR-344d-3p  |
| MSTRG.3640.2 | miR-3066-3p  |
| MSTRG.3640.2 | miR-873a-5p  |
| MSTRG.3640.2 | miR-7220-3p  |
| MSTRG.3640.2 | miR-467e-3p  |
| MSTRG.3640.2 | miR-467d-3p  |
| MSTRG.3640.2 | miR-467c-3p  |
| MSTRG.3640.2 | miR-467b-3p  |
| MSTRG.3640.2 | miR-3475-5p  |
| MSTRG.3640.2 | miR-216b-3p  |
| MSTRG.3640.2 | miR-9-3p     |
| MSTRG.3640.2 | miR-153-5p   |
| MSTRG.3640.2 | miR-8106     |
| MSTRG.3640.2 | miR-3535     |
| MSTRG.3640.2 | miR-6916-5p  |
| MSTRG.3640.2 | miR-669p-3p  |
| MSTRG.3640.2 | miR-135b-3p  |
| MSTRG.3640.2 | miR-543-3p   |
| MSTRG.3640.2 | miR-185-5p   |
| MSTRG.3640.2 | miR-6927-3p  |
| MSTRG.3640.2 | miR-195a-3p  |
| MSTRG.3640.2 | miR-6540-5p  |
| MSTRG.3640.2 | miR-7027-5p  |
| MSTRG.3640.2 | miR-1224-5p  |
| MSTRG.3640.2 | miR-466i-3p  |
| MSTRG.3640.2 | miR-501-5p   |
| MSTRG.3640.2 | miR-203-3p   |
| MSTRG.3640.2 | miR-3082-5p  |
| MSTRG.3640.2 | miR-6908-3p  |
| MSTRG.3640.2 | miR-7010-5p  |
| MSTRG.3640.2 | miR-466o-5p  |
| MSTRG.3640.2 | miR-466c-5p  |
| MSTRG.3640.2 | miR-466b-5p  |
| MSTRG.3640.2 | miR-503-3p   |

---

---

|              |                  |
|--------------|------------------|
| MSTRG.3640.2 | miR-1941-3p      |
| MSTRG.3640.2 | miR-706          |
| MSTRG.3640.2 | miR-26b-3p       |
| MSTRG.3640.2 | miR-26a-2-3p     |
| MSTRG.3640.2 | miR-6998-5p      |
| MSTRG.3640.2 | miR-3102-3p.2-3p |
| MSTRG.3640.2 | miR-450b-3p      |
| MSTRG.3640.2 | miR-450a-1-3p    |
| MSTRG.3640.2 | miR-6912-3p      |
| MSTRG.3640.2 | miR-668-3p       |
| MSTRG.3640.2 | miR-222-3p       |
| MSTRG.3640.2 | miR-221-3p       |
| MSTRG.3640.2 | miR-6902-3p      |
| MSTRG.3640.2 | miR-6911-3p      |
| MSTRG.3640.2 | miR-7231-5p      |
| MSTRG.3640.2 | miR-505-5p       |
| MSTRG.3640.2 | miR-1949         |
| MSTRG.3640.2 | miR-7087-5p      |
| MSTRG.3640.2 | miR-7224-3p      |
| MSTRG.3640.2 | miR-669i         |
| MSTRG.3640.2 | miR-547-3p       |
| MSTRG.3640.2 | miR-126a-5p      |
| MSTRG.3640.2 | miR-7055-3p      |
| MSTRG.3640.2 | miR-6955-3p      |
| MSTRG.3640.2 | miR-3100-5p      |
| MSTRG.3640.2 | miR-7240-5p      |
| MSTRG.3640.2 | miR-6947-5p      |
| MSTRG.3640.2 | miR-7665-5p      |
| MSTRG.3640.2 | miR-6976-5p      |
| MSTRG.3640.2 | miR-30f          |
| MSTRG.3640.2 | miR-384-5p       |
| MSTRG.3640.2 | miR-30d-5p       |
| MSTRG.3640.2 | miR-30c-5p       |
| MSTRG.3640.2 | miR-181b-2-3p    |
| MSTRG.3640.2 | miR-669d-5p      |
| MSTRG.3640.2 | miR-3095-3p      |
| MSTRG.3640.2 | miR-669a-3-3p    |
| MSTRG.3640.2 | miR-499-3p       |
| MSTRG.3640.2 | miR-7077-5p      |
| MSTRG.3640.2 | miR-5125         |
| MSTRG.3640.2 | miR-542-3p       |
| MSTRG.3640.2 | miR-679-3p       |
| MSTRG.3640.2 | miR-144-5p       |
| MSTRG.3640.2 | miR-7647-3p      |

---

---

|              |               |
|--------------|---------------|
| MSTRG.3640.2 | miR-7031-5p   |
| MSTRG.3640.2 | miR-582-3p    |
| MSTRG.3640.2 | miR-493-5p    |
| MSTRG.3640.2 | miR-7061-5p   |
| MSTRG.3640.2 | miR-466q      |
| MSTRG.3640.2 | miR-3087-3p   |
| MSTRG.3640.2 | miR-3078-5p   |
| MSTRG.3640.2 | miR-301a-5p   |
| MSTRG.3640.2 | miR-7081-3p   |
| MSTRG.3640.2 | miR-204-5p    |
| MSTRG.3640.2 | miR-190b-3p   |
| MSTRG.3640.2 | miR-495-3p    |
| MSTRG.3640.2 | miR-351-5p    |
| MSTRG.3640.2 | miR-125b-5p   |
| MSTRG.3640.2 | miR-125a-5p   |
| MSTRG.3877.7 | miR-466k      |
| MSTRG.3877.7 | miR-7116-3p   |
| MSTRG.3877.7 | miR-6903-3p   |
| MSTRG.3877.7 | miR-5101      |
| MSTRG.3877.7 | miR-126a-5p   |
| MSTRG.3877.7 | miR-153-5p    |
| MSTRG.3877.7 | miR-7240-5p   |
| MSTRG.3877.7 | miR-485-3p    |
| MSTRG.3877.7 | miR-551b-5p   |
| MSTRG.3877.7 | miR-505-3p    |
| MSTRG.3877.7 | miR-5125      |
| MSTRG.3877.7 | miR-351-3p    |
| MSTRG.3877.7 | miR-3475-5p   |
| MSTRG.3877.7 | miR-335-3p    |
| MSTRG.3877.7 | miR-302b-3p   |
| MSTRG.3877.7 | miR-7077-5p   |
| MSTRG.3877.7 | miR-3095-5p   |
| MSTRG.3877.7 | miR-6983-5p   |
| MSTRG.3877.7 | miR-7026-5p   |
| MSTRG.3877.7 | miR-23b-3p    |
| MSTRG.3877.7 | miR-23a-3p    |
| MSTRG.3877.7 | miR-129-5p    |
| MSTRG.3877.7 | miR-6946-3p   |
| MSTRG.3877.7 | miR-190b-3p   |
| MSTRG.3877.7 | miR-6516-5p   |
| MSTRG.3877.7 | miR-7220-5p   |
| MSTRG.3877.7 | miR-7073-5p   |
| MSTRG.3877.7 | miR-181b-2-3p |
| MSTRG.3877.7 | miR-702-3p    |

---

---

|               |               |
|---------------|---------------|
| MSTRG.3877.7  | miR-203-3p    |
| MSTRG.3877.7  | miR-7010-5p   |
| MSTRG.3877.7  | miR-694       |
| MSTRG.3877.7  | miR-335-5p    |
| MSTRG.3877.7  | miR-185-5p    |
| MSTRG.3877.7  | miR-421-3p    |
| MSTRG.3877.7  | miR-467c-5p   |
| MSTRG.3877.7  | miR-328-3p    |
| MSTRG.3877.7  | miR-361-5p    |
| MSTRG.3877.7  | miR-450b-5p   |
| MSTRG.3877.7  | miR-3092-3p   |
| MSTRG.3877.7  | miR-6240      |
| MSTRG.3877.7  | miR-330-3p    |
| MSTRG.3877.7  | miR-706       |
| MSTRG.3877.7  | miR-5621-5p   |
| MSTRG.14838.1 | miR-3084-3p   |
| MSTRG.14838.1 | miR-377-5p    |
| MSTRG.14838.1 | miR-153-5p    |
| MSTRG.14838.1 | miR-7671-5p   |
| MSTRG.1243.32 | miR-5101      |
| MSTRG.1243.32 | miR-466o-3p   |
| MSTRG.1243.32 | miR-466m-3p   |
| MSTRG.1243.32 | miR-706       |
| MSTRG.1243.32 | miR-466e-3p   |
| MSTRG.1243.32 | miR-466d-3p   |
| MSTRG.1243.32 | miR-466a-3p   |
| MSTRG.1243.32 | miR-7092-3p   |
| MSTRG.1243.32 | miR-222-3p    |
| MSTRG.1243.32 | miR-221-3p    |
| MSTRG.1243.32 | miR-6922-3p   |
| MSTRG.1243.32 | miR-466p-3p   |
| MSTRG.1243.32 | miR-466c-3p   |
| MSTRG.1243.32 | miR-466b-3p   |
| MSTRG.1243.32 | miR-7054-5p   |
| MSTRG.1243.32 | miR-484       |
| MSTRG.1243.32 | miR-7010-5p   |
| MSTRG.1243.32 | miR-181b-5p   |
| MSTRG.1243.32 | miR-669f-3p   |
| MSTRG.1243.32 | miR-467a-3p   |
| MSTRG.1243.32 | miR-1264-3p   |
| MSTRG.1243.32 | miR-5626-3p   |
| MSTRG.1243.32 | miR-181b-2-3p |
| MSTRG.1243.32 | miR-6402      |
| MSTRG.1243.32 | miR-7052-3p   |

---



---

|               |              |
|---------------|--------------|
| MSTRG.1243.32 | miR-6996-5p  |
| MSTRG.1243.32 | miR-30e-3p   |
| MSTRG.1243.32 | miR-30a-3p   |
| MSTRG.1243.32 | miR-669c-3p  |
| MSTRG.1243.32 | miR-6916-5p  |
| MSTRG.1243.32 | miR-7027-5p  |
| MSTRG.1243.32 | miR-329-3p   |
| MSTRG.1243.32 | miR-466f-3p  |
| MSTRG.1243.32 | miR-6946-3p  |
| MSTRG.1243.32 | miR-6999-5p  |
| MSTRG.1243.32 | miR-504-3p   |
| MSTRG.1243.32 | miR-6958-3p  |
| MSTRG.1243.32 | miR-3100-5p  |
| MSTRG.1243.32 | miR-30c-2-3p |
| MSTRG.1243.32 | miR-30c-1-3p |
| MSTRG.1243.32 | miR-676-5p   |
| MSTRG.1243.32 | miR-7073-5p  |
| MSTRG.1243.32 | miR-18b-5p   |
| MSTRG.1243.32 | miR-7116-3p  |
| MSTRG.1243.32 | miR-7b-5p    |
| MSTRG.1243.32 | miR-7a-5p    |
| MSTRG.1243.32 | miR-1194     |
| MSTRG.1243.32 | miR-7051-5p  |
| MSTRG.1243.32 | miR-467e-3p  |
| MSTRG.1243.32 | miR-467d-3p  |
| MSTRG.1243.32 | miR-467c-3p  |
| MSTRG.1243.32 | miR-467b-3p  |
| MSTRG.1243.32 | miR-466n-3p  |
| MSTRG.1243.32 | miR-669i     |
| MSTRG.1243.32 | miR-335-3p   |
| MSTRG.1243.32 | miR-6902-3p  |
| MSTRG.1243.32 | miR-760-5p   |
| MSTRG.1243.32 | miR-501-5p   |
| MSTRG.1243.32 | miR-692      |
| MSTRG.1243.32 | miR-7661-3p  |
| MSTRG.1243.32 | miR-466i-3p  |
| MSTRG.1243.32 | miR-6769b-3p |
| MSTRG.1243.32 | miR-128-3p   |
| MSTRG.1243.32 | miR-664-3p   |
| MSTRG.1243.32 | miR-6983-5p  |
| MSTRG.1243.32 | miR-551b-5p  |
| MSTRG.1243.32 | miR-6911-5p  |
| MSTRG.1243.32 | miR-7055-5p  |
| MSTRG.1243.32 | miR-874-3p   |

---

---

|               |               |
|---------------|---------------|
| MSTRG.1243.32 | miR-3572-3p   |
| MSTRG.1243.32 | miR-412-3p    |
| MSTRG.1243.32 | miR-378a-5p   |
| MSTRG.1243.32 | miR-7a-2-3p   |
| MSTRG.1243.32 | miR-148b-3p   |
| MSTRG.1243.32 | miR-3110-3p   |
| MSTRG.1243.32 | miR-7668-5p   |
| MSTRG.1243.32 | miR-1983      |
| MSTRG.1243.32 | miR-7081-3p   |
| MSTRG.1243.32 | miR-219a-1-3p |
| MSTRG.1243.32 | miR-194-2-3p  |
| MSTRG.1243.32 | miR-6984-3p   |
| MSTRG.1243.32 | miR-5129-5p   |
| MSTRG.1243.32 | miR-877-3p    |
| MSTRG.1243.32 | miR-5124b     |
| MSTRG.1243.32 | miR-222-5p    |
| MSTRG.1243.32 | miR-365-3p    |
| MSTRG.1243.32 | miR-1981-3p   |
| MSTRG.1243.32 | miR-129b-5p   |
| MSTRG.1243.32 | miR-701-3p    |
| MSTRG.1243.32 | miR-511-3p    |
| MSTRG.1243.32 | miR-7068-3p   |
| MSTRG.1243.32 | miR-539-5p    |
| MSTRG.1243.32 | miR-129b-3p   |
| MSTRG.1243.32 | miR-483-3p    |
| MSTRG.1243.32 | miR-450b-3p   |
| MSTRG.1243.32 | miR-450a-1-3p |
| MSTRG.1243.32 | miR-3082-3p   |
| MSTRG.1243.32 | miR-186-5p    |
| MSTRG.1243.32 | let-7f-2-3p   |
| MSTRG.1243.32 | miR-6541      |
| MSTRG.1243.32 | miR-6240      |
| MSTRG.1243.32 | miR-770-3p    |
| MSTRG.1243.32 | miR-6991-5p   |
| MSTRG.1243.32 | miR-1668      |
| MSTRG.1243.32 | miR-345-3p    |
| MSTRG.1243.32 | miR-139-5p    |
| MSTRG.1243.32 | miR-24-3p     |
| MSTRG.1243.32 | miR-7651-5p   |
| MSTRG.1243.32 | miR-330-3p    |
| MSTRG.1243.32 | miR-7665-5p   |
| MSTRG.5009.1  | miR-28a-3p    |
| MSTRG.5009.1  | miR-138-2-3p  |
| MSTRG.5009.1  | miR-3097-3p   |

---

---

|              |             |
|--------------|-------------|
| MSTRG.5009.1 | miR-3082-5p |
|--------------|-------------|

---

**Table S3.** Information of the downregulated lncRNA-miRNA network in the cortex of 7-month-old 5×FAD mice.

| Downregulated lncRNA | miRNA targets |
|----------------------|---------------|
| ENSMUST00000184170   | miR-380-3p    |
| ENSMUST00000184170   | miR-1933-3p   |
| ENSMUST00000184170   | miR-743b-3p   |
| ENSMUST00000184170   | miR-669b-5p   |
| ENSMUST00000184170   | miR-214-3p    |
| ENSMUST00000184170   | miR-7080-3p   |
| ENSMUST00000184170   | miR-411-5p    |
| ENSMUST00000184170   | miR-153-3p    |
| ENSMUST00000184170   | miR-15a-5p    |
| ENSMUST00000184170   | miR-16-5p     |
| ENSMUST00000184170   | miR-322-5p    |
| ENSMUST00000184170   | miR-497a-5p   |
| ENSMUST00000184170   | miR-195b      |
| ENSMUST00000184170   | miR-193a-3p   |
| ENSMUST00000184170   | miR-193b-3p   |
| ENSMUST00000184170   | miR-18a-5p    |
| ENSMUST00000184170   | miR-3070-5p   |
| ENSMUST00000184170   | miR-488-3p    |
| ENSMUST00000184170   | miR-145b      |
| ENSMUST00000184170   | miR-127-5p    |
| ENSMUST00000184170   | miR-7043-3p   |
| ENSMUST00000184170   | miR-669p-5p   |
| ENSMUST00000184170   | miR-29c-5p    |
| ENSMUST00000184170   | miR-3058-3p   |
| ENSMUST00000145774   | miR-7056-5p   |
| ENSMUST00000132392   | miR-23b-5p    |
| ENSMUST00000132392   | miR-7048-3p   |
| ENSMUST00000132392   | miR-98-3p     |
| ENSMUST00000132392   | let-7f-1-3p   |
| ENSMUST00000132392   | let-7b-3p     |
| ENSMUST00000132392   | miR-7077-3p   |
| ENSMUST00000182451   | miR-669e-5p   |
| ENSMUST00000182451   | miR-1933-3p   |
| ENSMUST00000182451   | miR-6906-5p   |
| ENSMUST00000182451   | miR-666-3p    |
| ENSMUST00000161415   | miR-6919-5p   |
| ENSMUST00000161415   | miR-6954-3p   |
| ENSMUST00000161415   | miR-574-5p    |
| ENSMUST00000161415   | miR-1291      |
| ENSMUST00000161415   | miR-1258-3p   |
| ENSMUST00000161415   | miR-210-5p    |

---

|                    |             |
|--------------------|-------------|
| ENSMUST00000161415 | miR-709     |
| ENSMUST00000161415 | miR-342-5p  |
| ENSMUST00000161415 | miR-7684-5p |
| ENSMUST00000161415 | miR-3078-3p |
| ENSMUST00000161415 | miR-3087-5p |
| ENSMUST00000161415 | miR-7034-3p |
| ENSMUST00000161415 | miR-3084-5p |
| ENSMUST00000161415 | miR-3090-3p |
| ENSMUST00000161415 | miR-134-5p  |
| ENSMUST00000161415 | miR-330-5p  |
| ENSMUST00000161415 | miR-326-3p  |
| ENSMUST00000161415 | miR-6907-5p |
| ENSMUST00000161415 | miR-101b-3p |
| ENSMUST00000161415 | miR-1188-3p |
| ENSMUST00000161415 | miR-669e-5p |
| ENSMUST00000161637 | miR-346-3p  |
| ENSMUST00000161637 | miR-210-5p  |
| ENSMUST00000161637 | miR-27a-3p  |
| ENSMUST00000161637 | miR-193b-5p |
| ENSMUST00000161637 | miR-300-5p  |
| ENSMUST00000161637 | miR-16-1-3p |
| ENSMUST00000161637 | miR-1258-5p |
| ENSMUST00000161637 | miR-16-2-3p |
| ENSMUST00000161637 | miR-219a-5p |
| ENSMUST00000161637 | miR-702-5p  |
| ENSMUST00000161637 | miR-337-3p  |
| ENSMUST00000161637 | miR-7013-3p |
| ENSMUST00000161637 | miR-881-3p  |
| ENSMUST00000161637 | miR-300-3p  |
| ENSMUST00000161637 | miR-3078-3p |
| ENSMUST00000161637 | miR-6985-3p |
| ENSMUST00000161637 | miR-673-5p  |
| ENSMUST00000161637 | miR-6900-5p |
| ENSMUST00000161637 | miR-666-3p  |
| ENSMUST00000161637 | miR-152-5p  |
| ENSMUST00000161637 | miR-376c-3p |
| ENSMUST00000161637 | miR-214-5p  |
| ENSMUST00000124691 | miR-3098-3p |
| ENSMUST00000124691 | miR-6899-3p |
| ENSMUST00000124691 | miR-28b     |
| ENSMUST00000124691 | miR-136-5p  |
| ENSMUST00000141539 | miR-6918-5p |
| ENSMUST00000141539 | miR-7037-3p |
| ENSMUST00000141539 | miR-1224-3p |

---

---

|                    |             |
|--------------------|-------------|
| ENSMUST00000141539 | miR-3067-5p |
| ENSMUST00000141539 | miR-216a-3p |
| ENSMUST00000141539 | miR-214-3p  |
| ENSMUST00000141539 | miR-6954-3p |
| ENSMUST00000141539 | miR-1258-5p |
| ENSMUST00000162401 | miR-6901-5p |
| ENSMUST00000162401 | miR-20a-3p  |
| ENSMUST00000162401 | miR-326-3p  |
| ENSMUST00000162401 | miR-330-5p  |
| ENSMUST00000162401 | miR-337-3p  |
| ENSMUST00000162401 | miR-3085-5p |
| ENSMUST00000162401 | miR-7662-5p |
| ENSMUST00000162401 | miR-152-3p  |
| ENSMUST00000162401 | miR-148a-3p |
| ENSMUST00000162401 | miR-8103    |
| ENSMUST00000162401 | miR-7675-3p |
| ENSMUST00000162401 | miR-214-3p  |
| ENSMUST00000162401 | miR-690     |
| ENSMUST00000139277 | miR-30d-3p  |
| ENSMUST00000139277 | miR-6934-5p |
| ENSMUST00000139277 | miR-211-5p  |
| ENSMUST00000139277 | miR-3088-3p |
| ENSMUST00000129857 | miR-378b    |
| ENSMUST00000129857 | miR-7043-3p |
| ENSMUST00000129857 | miR-6418-3p |
| ENSMUST00000129857 | miR-666-3p  |
| ENSMUST00000129857 | miR-3057-5p |
| ENSMUST00000129857 | miR-7034-3p |
| ENSMUST00000129857 | miR-935     |
| ENSMUST00000129857 | miR-7117-3p |
| ENSMUST00000129857 | miR-145b    |
| ENSMUST00000129857 | miR-6966-3p |
| ENSMUST00000129857 | miR-5624-5p |
| ENSMUST00000129857 | miR-138-5p  |
| ENSMUST00000129857 | miR-7237-3p |
| ENSMUST00000129857 | miR-23b-5p  |
| ENSMUST00000129857 | miR-3078-3p |
| ENSMUST00000129857 | miR-337-3p  |
| ENSMUST00000129857 | miR-669k-5p |
| ENSMUST00000209301 | miR-7222-3p |
| ENSMUST00000199237 | miR-871-3p  |
| ENSMUST00000199237 | miR-700-5p  |
| ENSMUST00000199237 | miR-758-3p  |
| ENSMUST00000199237 | miR-666-3p  |

---

---

|                    |              |
|--------------------|--------------|
| ENSMUST00000199237 | let-7k       |
| ENSMUST00000199237 | let-7c-5p    |
| ENSMUST00000199237 | let-7b-5p    |
| ENSMUST00000199237 | miR-7024-3p  |
| ENSMUST00000137980 | miR-296-5p   |
| ENSMUST00000137980 | miR-490-3p   |
| ENSMUST00000137980 | miR-107-5p   |
| ENSMUST00000137980 | miR-103-2-5p |
| ENSMUST00000137980 | miR-103-1-5p |
| ENSMUST00000137980 | miR-1958     |
| ENSMUST00000137980 | miR-5621-3p  |
| ENSMUST00000141357 | miR-6898-5p  |
| ENSMUST00000141357 | miR-339-5p   |
| ENSMUST00000141357 | miR-7211-5p  |
| ENSMUST00000141357 | miR-743b-3p  |
| ENSMUST00000141357 | miR-708-5p   |
| ENSMUST00000141357 | miR-337-3p   |
| ENSMUST00000141357 | miR-135b-5p  |
| ENSMUST00000141357 | miR-135a-5p  |
| ENSMUST00000141357 | miR-7049-5p  |
| ENSMUST00000141357 | miR-6979-3p  |
| ENSMUST00000210394 | miR-298-5p   |
| ENSMUST00000210394 | miR-6900-5p  |
| ENSMUST00000210394 | miR-3073a-3p |
| ENSMUST00000146588 | miR-182-5p   |
| ENSMUST00000146588 | miR-7000-3p  |
| ENSMUST00000146588 | miR-876-5p   |
| ENSMUST00000146588 | miR-1249-5p  |
| ENSMUST00000144628 | miR-7042-5p  |
| ENSMUST00000144628 | miR-5615-3p  |
| ENSMUST00000144628 | miR-8107     |
| ENSMUST00000144628 | miR-3086-5p  |
| ENSMUST00000144628 | miR-7243-3p  |
| ENSMUST00000144628 | miR-214-5p   |
| ENSMUST00000144628 | miR-6913-5p  |
| ENSMUST00000144628 | miR-376b-3p  |
| ENSMUST00000145741 | miR-7214-5p  |
| ENSMUST00000145741 | miR-290b-5p  |
| ENSMUST00000145741 | miR-142b     |
| ENSMUST00000145741 | miR-199b-5p  |
| ENSMUST00000145741 | miR-199a-5p  |
| ENSMUST00000145741 | miR-22-5p    |
| ENSMUST00000145741 | miR-3572-5p  |
| ENSMUST00000145741 | miR-1930-5p  |

---

---

|                    |             |
|--------------------|-------------|
| ENSMUST00000145741 | miR-20a-3p  |
| ENSMUST00000145741 | miR-7688-5p |
| ENSMUST00000145741 | miR-7675-3p |
| ENSMUST00000145741 | miR-7024-3p |
| ENSMUST00000145741 | miR-96-3p   |
| ENSMUST00000145741 | miR-344f-5p |
| ENSMUST00000145741 | miR-7669-3p |
| ENSMUST00000145741 | miR-449a-5p |
| ENSMUST00000145741 | miR-34a-5p  |
| ENSMUST00000145741 | miR-3088-3p |
| ENSMUST00000145741 | miR-1231-5p |
| ENSMUST00000145741 | miR-743b-3p |
| ENSMUST00000145741 | miR-224-5p  |
| ENSMUST00000145741 | miR-6905-5p |
| ENSMUST00000145741 | miR-6994-5p |
| ENSMUST00000145741 | miR-3106-5p |
| ENSMUST00000145741 | miR-206-3p  |
| ENSMUST00000145741 | miR-767     |
| ENSMUST00000145741 | miR-449c-5p |
| ENSMUST00000145741 | miR-449b    |
| ENSMUST00000145741 | miR-34c-5p  |
| ENSMUST00000145741 | miR-34b-5p  |
| ENSMUST00000145741 | miR-130b-3p |
| ENSMUST00000145741 | miR-7034-3p |
| ENSMUST00000145741 | miR-19b-3p  |
| ENSMUST00000145741 | miR-19a-3p  |
| ENSMUST00000145741 | miR-300-5p  |
| ENSMUST00000145741 | miR-7048-3p |
| ENSMUST00000145741 | miR-135b-5p |
| ENSMUST00000145741 | miR-135a-5p |
| ENSMUST00000221246 | miR-7117-3p |
| ENSMUST00000221246 | miR-300-5p  |
| ENSMUST00000221246 | miR-665-3p  |
| ENSMUST00000221246 | miR-744-3p  |
| ENSMUST00000221246 | miR-5619-5p |
| ENSMUST00000221246 | miR-290b-5p |
| ENSMUST00000221246 | miR-6967-3p |
| ENSMUST00000221246 | miR-6896-3p |
| ENSMUST00000221246 | miR-205-5p  |
| ENSMUST00000221246 | miR-6918-5p |
| ENSMUST00000221246 | miR-147-5p  |
| MSTRG.17500.1      | miR-466i-5p |
| MSTRG.17500.1      | miR-466d-5p |
| MSTRG.17500.1      | miR-6899-3p |

---



---

|                |              |
|----------------|--------------|
| MSTRG.17500.1  | miR-3090-3p  |
| MSTRG.17500.1  | miR-210-5p   |
| MSTRG.17500.1  | miR-6940-3p  |
| MSTRG.17500.1  | miR-7675-3p  |
| MSTRG.17500.1  | miR-6951-5p  |
| MSTRG.17500.1  | miR-3473a    |
| MSTRG.17500.1  | miR-20b-3p   |
| MSTRG.17500.1  | miR-17-3p    |
| MSTRG.17500.1  | miR-3073a-3p |
| MSTRG.17500.1  | miR-199b-3p  |
| MSTRG.17500.1  | miR-199a-3p  |
| MSTRG.17500.1  | miR-134-5p   |
| MSTRG.17500.1  | miR-6979-3p  |
| MSTRG.17500.1  | miR-7056-5p  |
| MSTRG.17500.1  | miR-340-5p   |
| MSTRG.17500.1  | miR-7000-3p  |
| MSTRG.17500.1  | miR-421-5p   |
| MSTRG.17500.1  | miR-670-3p   |
| MSTRG.17500.1  | miR-3110-5p  |
| MSTRG.17500.1  | miR-1258-5p  |
| MSTRG.17500.1  | miR-3547-5p  |
| MSTRG.17500.1  | miR-1249-3p  |
| MSTRG.17500.1  | miR-491-3p   |
| MSTRG.17500.1  | miR-3098-3p  |
| MSTRG.17500.1  | miR-7217-5p  |
| MSTRG.17500.1  | miR-6953-3p  |
| MSTRG.17500.1  | miR-7117-3p  |
| MSTRG.17500.1  | miR-211-5p   |
| MSTRG.17500.1  | miR-6537-5p  |
| MSTRG.17500.1  | miR-202-5p   |
| MSTRG.17500.1  | miR-134-3p   |
| MSTRG.17500.1  | miR-3059-5p  |
| MSTRG.18699.11 | miR-216a-3p  |
| MSTRG.18699.11 | miR-187-5p   |
| MSTRG.18699.11 | miR-3108-5p  |
| MSTRG.18699.11 | miR-1231-3p  |
| MSTRG.18699.11 | miR-652-5p   |
| MSTRG.18699.11 | miR-6907-5p  |
| MSTRG.18699.11 | miR-6900-5p  |
| MSTRG.18699.11 | miR-6967-3p  |
| MSTRG.7748.1   | miR-466i-5p  |
| MSTRG.7748.1   | miR-466d-5p  |
| MSTRG.7748.1   | miR-7217-5p  |
| MSTRG.7748.1   | miR-297a-5p  |

---

---

|              |              |
|--------------|--------------|
| MSTRG.7748.1 | miR-297c-5p  |
| MSTRG.7748.1 | miR-297b-5p  |
| MSTRG.7748.1 | miR-6896-3p  |
| MSTRG.7748.1 | miR-7118-3p  |
| MSTRG.7748.1 | miR-669b-5p  |
| MSTRG.7748.1 | miR-1a-1-5p  |
| MSTRG.7748.1 | miR-802-5p   |
| MSTRG.7748.1 | miR-7093-3p  |
| MSTRG.7748.1 | miR-19b-1-5p |
| MSTRG.7748.1 | miR-190a-3p  |
| MSTRG.7748.1 | miR-488-3p   |
| MSTRG.7748.1 | miR-466n-5p  |
| MSTRG.7748.1 | miR-3064-3p  |
| MSTRG.7748.1 | miR-758-3p   |
| MSTRG.7748.1 | miR-374b-5p  |
| MSTRG.7748.1 | miR-3963     |
| MSTRG.7748.1 | miR-3086-5p  |
| MSTRG.7748.1 | miR-7047-3p  |
| MSTRG.7748.1 | miR-134-5p   |
| MSTRG.7748.1 | miR-669k-5p  |
| MSTRG.7748.1 | miR-1192     |
| MSTRG.7748.1 | miR-6952-3p  |
| MSTRG.7748.1 | miR-3088-3p  |
| MSTRG.7748.1 | miR-876-5p   |
| MSTRG.7748.1 | miR-7043-3p  |
| MSTRG.7748.1 | miR-200a-3p  |
| MSTRG.7748.1 | miR-141-3p   |
| MSTRG.7748.1 | miR-6896-5p  |
| MSTRG.7748.1 | miR-5107-3p  |
| MSTRG.7748.1 | miR-7043-5p  |
| MSTRG.7748.1 | miR-27a-3p   |
| MSTRG.7748.1 | miR-496a-3p  |
| MSTRG.7748.1 | miR-1929-5p  |
| MSTRG.7748.1 | miR-489-3p   |
| MSTRG.7748.1 | miR-122-5p   |
| MSTRG.7748.1 | miR-146a-3p  |
| MSTRG.7748.1 | miR-3964     |
| MSTRG.7748.1 | miR-202-5p   |
| MSTRG.7748.1 | miR-653-5p   |
| MSTRG.7748.1 | miR-337-3p   |
| MSTRG.7748.1 | miR-183-3p   |
| MSTRG.7748.1 | miR-130a-5p  |
| MSTRG.7748.1 | miR-301b-5p  |
| MSTRG.7748.1 | miR-142b     |

---

---

|              |             |
|--------------|-------------|
| MSTRG.7748.1 | miR-1968-5p |
| MSTRG.7748.1 | miR-669b-3p |
| MSTRG.7748.1 | miR-1b-5p   |
| MSTRG.7748.1 | miR-880-3p  |
| MSTRG.7748.1 | miR-470-5p  |
| MSTRG.7748.1 | miR-547-5p  |
| MSTRG.7748.1 | miR-124-5p  |
| MSTRG.7748.1 | miR-7048-3p |
| MSTRG.7748.1 | miR-7037-3p |
| MSTRG.7748.1 | miR-7015-5p |
| MSTRG.7748.1 | miR-421-5p  |
| MSTRG.7748.1 | miR-6481    |
| MSTRG.7748.1 | miR-1231-3p |
| MSTRG.7748.1 | miR-30e-5p  |
| MSTRG.7748.1 | miR-30b-5p  |
| MSTRG.7748.1 | miR-30a-5p  |
| MSTRG.7748.1 | miR-136-5p  |
| MSTRG.7748.1 | miR-1930-5p |
| MSTRG.7748.1 | miR-7077-3p |
| MSTRG.7748.1 | let-7c-1-3p |
| MSTRG.7748.1 | miR-5620-3p |
| MSTRG.7748.1 | miR-6537-5p |
| MSTRG.7748.1 | miR-20a-3p  |
| MSTRG.7748.1 | miR-669m-5p |
| MSTRG.7748.1 | miR-466m-5p |
| MSTRG.7748.1 | miR-466j    |
| MSTRG.7748.1 | miR-466h-5p |
| MSTRG.7748.1 | miR-9-5p    |
| MSTRG.7748.1 | miR-669d-3p |
| MSTRG.7748.1 | miR-297c-3p |
| MSTRG.7748.1 | miR-297b-3p |
| MSTRG.7748.1 | miR-297a-3p |
| MSTRG.7748.1 | miR-217-5p  |
| MSTRG.7748.1 | miR-290a-5p |
| MSTRG.7748.1 | miR-1197-3p |
| MSTRG.7748.1 | miR-5121    |
| MSTRG.7748.1 | miR-290b-5p |
| MSTRG.7748.1 | miR-592-5p  |
| MSTRG.7748.1 | miR-344e-3p |
| MSTRG.7748.1 | miR-3969    |
| MSTRG.7748.1 | miR-6942-5p |
| MSTRG.7748.1 | miR-883a-3p |
| MSTRG.7748.1 | miR-154-3p  |
| MSTRG.7748.1 | miR-7646-5p |

---

---

|               |               |
|---------------|---------------|
| MSTRG.7748.1  | miR-6985-5p   |
| MSTRG.7748.1  | miR-339-5p    |
| MSTRG.7748.1  | miR-679-5p    |
| MSTRG.7748.1  | miR-6987-3p   |
| MSTRG.7748.1  | miR-669m-3p   |
| MSTRG.7748.1  | miR-7056-5p   |
| MSTRG.7748.1  | miR-743b-3p   |
| MSTRG.7748.1  | miR-669h-5p   |
| MSTRG.7748.1  | miR-1936      |
| MSTRG.7748.1  | miR-22-5p     |
| MSTRG.7748.1  | miR-6912-5p   |
| MSTRG.7748.1  | miR-6986-5p   |
| MSTRG.7748.1  | miR-6925-3p   |
| MSTRG.7748.1  | miR-6951-5p   |
| MSTRG.7748.1  | miR-7649-3p   |
| MSTRG.7748.1  | miR-7237-3p   |
| MSTRG.7748.1  | miR-218-5p    |
| MSTRG.7748.1  | miR-324-5p    |
| MSTRG.7748.1  | miR-3074-1-3p |
| MSTRG.7748.1  | miR-350-3p    |
| MSTRG.7748.1  | miR-8107      |
| MSTRG.7748.1  | miR-155-3p    |
| MSTRG.7748.1  | miR-6934-3p   |
| MSTRG.7748.1  | miR-3473a     |
| MSTRG.7748.1  | miR-6954-3p   |
| MSTRG.7748.1  | miR-340-5p    |
| MSTRG.7748.1  | miR-96-5p     |
| MSTRG.7748.1  | miR-3471      |
| MSTRG.7748.1  | miR-194-1-3p  |
| MSTRG.7748.1  | miR-6989-5p   |
| MSTRG.18699.5 | miR-216a-3p   |
| MSTRG.18699.5 | miR-187-5p    |
| MSTRG.18699.5 | miR-3108-5p   |
| MSTRG.18699.5 | miR-669m-5p   |
| MSTRG.18699.5 | miR-466m-5p   |
| MSTRG.18699.5 | miR-466j      |
| MSTRG.18699.5 | miR-466h-5p   |
| MSTRG.18699.5 | miR-340-5p    |
| MSTRG.18699.5 | miR-7674-3p   |
| MSTRG.18699.5 | miR-6481      |
| MSTRG.18699.5 | miR-6967-3p   |
| MSTRG.18699.5 | miR-466n-5p   |
| MSTRG.18699.5 | miR-1258-3p   |
| MSTRG.18699.5 | miR-376c-3p   |

---

---

|               |             |
|---------------|-------------|
| MSTRG.18699.5 | miR-466f    |
| MSTRG.18699.5 | miR-544-3p  |
| MSTRG.18699.5 | miR-7661-5p |
| MSTRG.18699.5 | miR-5126    |
| MSTRG.18699.5 | miR-709     |
| MSTRG.18699.5 | miR-6945-3p |
| MSTRG.18699.5 | miR-6952-3p |
| MSTRG.18699.5 | miR-155-3p  |
| MSTRG.18699.5 | miR-350-3p  |
| MSTRG.18699.5 | miR-6900-5p |
| MSTRG.18699.5 | miR-301b-5p |
| MSTRG.18699.5 | miR-744-5p  |
| MSTRG.18699.5 | miR-466i-5p |
| MSTRG.18699.5 | miR-703     |
| MSTRG.18699.5 | miR-10b-5p  |
| MSTRG.18699.5 | miR-10a-5p  |
| MSTRG.18699.5 | miR-696     |
| MSTRG.18699.5 | miR-19b-3p  |
| MSTRG.18699.5 | miR-19a-3p  |
| MSTRG.18699.5 | miR-33-3p   |
| MSTRG.18699.5 | miR-7042-5p |
| MSTRG.18699.5 | miR-339-5p  |
| MSTRG.18699.5 | miR-377-3p  |
| MSTRG.18699.5 | miR-338-3p  |
| MSTRG.18699.5 | miR-7049-5p |
| MSTRG.18699.5 | miR-7222-3p |
| MSTRG.18699.5 | miR-3473a   |
| MSTRG.18699.5 | miR-491-3p  |
| MSTRG.18699.5 | miR-1231-3p |
| MSTRG.18699.5 | miR-3089-3p |
| MSTRG.18699.5 | miR-429-3p  |
| MSTRG.18699.5 | miR-200c-3p |
| MSTRG.18699.5 | miR-200b-3p |
| MSTRG.8598.3  | miR-188-3p  |
| MSTRG.8598.3  | miR-3572-5p |
| MSTRG.8598.3  | miR-3552    |
| MSTRG.8598.3  | miR-3066-5p |
| MSTRG.8598.3  | miR-142a-5p |
| MSTRG.8598.3  | miR-19b-3p  |
| MSTRG.8598.3  | miR-19a-3p  |
| MSTRG.8598.3  | miR-154-3p  |
| MSTRG.8598.3  | miR-216a-5p |
| MSTRG.8598.3  | miR-27b-5p  |
| MSTRG.8598.3  | miR-141-5p  |

---

---

|              |             |
|--------------|-------------|
| MSTRG.8598.3 | miR-6989-3p |
| MSTRG.8598.3 | miR-670-3p  |
| MSTRG.8598.3 | miR-28b     |
| MSTRG.8598.3 | miR-20a-5p  |
| MSTRG.8598.3 | miR-106b-5p |
| MSTRG.8598.3 | miR-93-5p   |
| MSTRG.8598.3 | miR-17-5p   |
| MSTRG.8598.3 | miR-106a-5p |
| MSTRG.8598.3 | miR-217-5p  |
| MSTRG.8598.3 | miR-6395    |
| MSTRG.8598.3 | miR-30e-5p  |
| MSTRG.8598.3 | miR-30b-5p  |
| MSTRG.8598.3 | miR-30a-5p  |
| MSTRG.8598.3 | miR-6896-3p |
| MSTRG.8598.3 | miR-1231-3p |
| MSTRG.8598.3 | miR-324-5p  |

---

**Table S4.** Correlated information of the upregulated lncRNA-associated ceRNA network in the cerebral cortex of 5×FAD mice.

| Upregulated lncRNA | Downregulated miRNA                                                                                                                                       | Upregulated mRNA                                                                                                                                                                                                                                                 |
|--------------------|-----------------------------------------------------------------------------------------------------------------------------------------------------------|------------------------------------------------------------------------------------------------------------------------------------------------------------------------------------------------------------------------------------------------------------------|
| ENSMUST00000127786 | miR-694, miR-329-3p,<br>miR-5101, miR-669f-3p,<br>miR-686, miR-466a-3p,<br>miR-466d-3p, miR-466e-3p,<br>miR-466n-3p, miR-335-3p,<br>miR-466l-3p           | Pex19, AW554918, Rnf24,<br>P2ry13, Eph4, Arnt2, Lpl,<br>Dzank1, Cct7, Prkcd, Clec7a,<br>5730455P16Rik, Tbccl, Rnf165,<br>Brd8, Plek, Eif2s2, Daam1,<br>Tmem175, Dcun1d1, Rin2,<br>Zfp260, Zmym5, Hecw2,<br>R3hdm2, Mgl1, Lin54, Gpr34                            |
|                    | miR-694, miR-466k,<br>miR-669f-3p, miR-686,<br>miR-466a-3p, miR-466d-3p,<br>miR-466e-3p, miR-466n-3p,<br>miR-335-3p, miR-466l-3p                          | Pex19, AW554918, Rnf24,<br>P2ry13, Eph4, Arnt2, Lpl,<br>Dzank1, Clcn3, Prkcd,<br>Tmem175, Wscd1, Cdc42ep4,<br>Clec7a, Mgl1, Rin2,<br>5730455P16Rik, Zfp260,<br>Zmym5, Rnf165, Plek, Hecw2,<br>Daam1, R3hdm2, Lin54, Gpr34                                        |
| MSTRG.15393.1      | miR-694, miR-466l-3p                                                                                                                                      | Pex19, AW554918, Rnf24,<br>P2ry13, Eph4, Arnt2, Lpl,<br>Lin54                                                                                                                                                                                                    |
| MSTRG.17500.2      | miR-694, miR-329-3p,<br>miR-466k, miR-5101, miR-686,<br>miR-466a-3p, miR-466d-3p,<br>miR-466e-3p, miR-466n-3p,<br>miR-466l-3                              | Pex19, AW554918, Rnf24,<br>P2ry13, Eph4, Arnt2, Lpl,<br>Dzank1, Cct7, Prkcd, Clec7a,<br>Clcn3, Tmem175, Wscd1,<br>Cdc42ep4, Mgl1, Rin2,<br>5730455P16Rik, Tbccl, Rnf165,<br>Brd8, Plek, Eif2s2, Daam1,<br>Dcun1d1, R3hdm2, Zmym5,<br>Lin54, Hecw2                |
|                    | miR-694, miR-329-3p,<br>miR-466k, miR-5101,<br>miR-669f-3p, miR-686,<br>miR-466a-3p, miR-466d-3p,<br>miR-466e-3p, miR-466n-3p,<br>miR-335-3p, miR-466l-3p | Pex19, AW554918, Rnf24,<br>P2ry13, Eph4, Arnt2, Lpl,<br>Dzank1, Cct7, Prkcd, Clec7a,<br>Clcn3, Tmem175, Wscd1,<br>Cdc42ep4, Mgl1, Rin2,<br>5730455P16Rik, Tbccl, Rnf165,<br>Brd8, Plek, Eif2s2, Daam1,<br>Dcun1d1, Zfp260, Zmym5,<br>Hecw2, R3hdm2, Lin54, Gpr34 |
| MSTRG.12843.10     |                                                                                                                                                           |                                                                                                                                                                                                                                                                  |

|                    |                                                                                                                                |                                                                                                                                                                                                                                    |
|--------------------|--------------------------------------------------------------------------------------------------------------------------------|------------------------------------------------------------------------------------------------------------------------------------------------------------------------------------------------------------------------------------|
|                    |                                                                                                                                | Pex19, AW554918, Rnf24, P2ry13, Eph4, Arnt2, Lpl, Dzank1, Clcn3, Prkcd, Tmem175, Wscd1, Cdc42ep4, Clec7a, Mgl1, Rin2, 5730455P16Rik, Tbccl, Rnf165, Brd8, Plek, Eif2s2, Daam1, Dcun1d1, Zfp260, Zmym5, Hecw2, R3hdm2, Lin54, Gpr34 |
| MSTRG.3640.2       | miR-694, miR-466k, miR-5101, miR-669f-3p, miR-686, miR-466a-3p, miR-466d-3p, miR-466e-3p, miR-466n-3p, miR-335-3p, miR-466l-3p | Pex19, AW554918, Rnf24, P2ry13, Eph4, Arnt2, Lpl, Dzank1, Clcn3, Prkcd, Tmem175, Wscd1, Cdc42ep4, Clec7a, Mgl1, Rin2, 5730455P16Rik, Tbccl, Rnf165, Brd8, Plek, Eif2s2, Daam1, Dcun1d1, Zfp260, Zmym5, Hecw2, R3hdm2, Lin54, Gpr34 |
| MSTRG.3877.7       | miR-694, miR-466k, miR-5101, miR-335-3p                                                                                        | Pex19, AW554918, Rnf24, P2ry13, Eph4, Arnt2, Lpl, Dzank1, Clcn3, Prkcd, Tmem175, Wscd1, Cdc42ep4, Clec7a, Mgl1, Rin2, 5730455P16Rik, Tbccl, Rnf165, Brd8, Plek, Eif2s2, Daam1, Dcun1d1, Hecw2, Gpr34                               |
| ENSMUST00000182231 | miR-329-3p                                                                                                                     | Dzank1, Cct7, Eph4, Prkcd, Clec7a                                                                                                                                                                                                  |
| ENSMUST00000155277 | miR-329-3p, miR-466a-3p, miR-466d-3p, miR-466e-3p, miR-466n-3p                                                                 | Dzank1, Cct7, Eph4, Prkcd, Clec7a, Zmym5, Lin54, Hecw2                                                                                                                                                                             |
| MSTRG.1243.32      | miR-329-3p, miR-5101, miR-669f-3p, miR-466a-3p, miR-466d-3p, miR-466e-3p, miR-466n-3p, miR-335-3p                              | Dzank1, Cct7, Eph4, Prkcd, Clec7a, 5730455P16Rik, Tbccl, Rnf165, Brd8, Plek, Eif2s2, Daam1, Tmem175, Dcun1d1, Lpl, Rin2, Zfp260, Zmym5, Hecw2, Lin54, Gpr34                                                                        |
| MSTRG.16327.2      | miR-466k                                                                                                                       | Dzank1, Eph4, Clcn3, Prkcd, Tmem175, Wscd1, Cdc42ep4, Clec7a, Mgl1, Rin2                                                                                                                                                           |
| ENSMUST00000126335 | miR-5101                                                                                                                       | 5730455P16Rik, Tbccl, Rnf165, Brd8, Plek, Eif2s2, Daam1, Tmem175, Dcun1d1, Lpl, Rin2                                                                                                                                               |
| ENSMUST00000189564 | miR-669f-3p, miR-335-3p                                                                                                        | 5730455P16Rik, Zfp260, Zmym5, Rnf165, Plek, Hecw2, Prkcd, Gpr34, Eph4, Tmem175                                                                                                                                                     |
| ENSMUST00000111019 | miR-669f-3p, miR-686, miR-466a-3p, miR-466d-3p, miR-466e-3p, miR-335-3p                                                        | 5730455P16Rik, Zfp260, Zmym5, Rnf165, Plek, Hecw2, Prkcd, Daam1, R3hdm2, Mgl1, Lin54, Gpr34, Eph4, Tmem175                                                                                                                         |
| ENSMUST00000205779 | miR-686                                                                                                                        | 5730455P16Rik, Daam1, R3hdm2, Mgl1                                                                                                                                                                                                 |



---

|                    |                                          |                            |
|--------------------|------------------------------------------|----------------------------|
| ENSMUST00000221971 | miR-466a-3p, miR-466d-3p,<br>miR-466e-3p | Zmym5, Lin54, Hecw2, Prkcd |
|--------------------|------------------------------------------|----------------------------|

---

**Table S5.** Correlated information of the downregulated lncRNA-associated ceRNA network in the cerebral cortex of 5×FAD mice.

| Downregulated lncRNA | Upregulated miRNA                                            | Downregulated mRNA                                                                                    |
|----------------------|--------------------------------------------------------------|-------------------------------------------------------------------------------------------------------|
| ENSMUST00000145741   | miR-19b-3p, miR-743b-3p                                      | Dpp6, Zcchc2, Hecw2, Npnt, Daam1, Tardbp, Hnrnpa3, Ttc14, Tmem175, Dcun1d1                            |
| MSTRG.18699.5        | miR-19b-3p, miR-340-5p, miR-339-5p, miR-466i-5p              | Dpp6, Zcchc2, Hecw2, Npnt, Daam1, Tardbp, R3hdm2, Brsk2, Slc4a10, Ank3, Delk1, Slc1a2, Tmem175, Zfp68 |
| MSTRG.8598.3         | miR-19b-3p                                                   | Dpp6, Zcchc2, Hecw2, Npnt, Daam1                                                                      |
| MSTRG.17500.1        | miR-340-5p, miR-466i-5p                                      | Tardbp, Npnt, R3hdm2, Brsk2, Slc4a10, Ank3, Slc1a2, Tmem175, Zfp68                                    |
| MSTRG.7748.1         | miR-340-5p, miR-743b-3p, miR-339-5p, miR-337-3p, miR-466i-5p | Tardbp, Npnt, R3hdm2, Brsk2, Slc4a10, Ank3, Hnrnpa3, Ttc14, Tmem175, Dcun1d1, Delk1, Slc1a2, Zfp68    |
| ENSMUST00000184170   | miR-743b-3p, miR-214-3p                                      | Tardbp, Hnrnpa3, Ttc14, Tmem175, Dcun1d1, Klc1                                                        |
| ENSMUST00000141357   | miR-743b-3p, miR-339-5p, miR-337-3p                          | Tardbp, Hnrnpa3, Ttc14, Tmem175, Dcun1d1, Delk1, Slc1a2                                               |
| ENSMUST00000182451   | miR-666-3p                                                   | Hnrnpa3, Akt2, Sulf2                                                                                  |
| ENSMUST00000161637   | miR-666-3p, miR-337-3p                                       | Hnrnpa3, Akt2, Sulf2, Slc1a2                                                                          |
| ENSMUST00000129857   | miR-666-3p, miR-337-3p                                       | Hnrnpa3, Akt2, Sulf2, Slc1a2                                                                          |
| ENSMUST00000199237   | miR-666-3p                                                   | Hnrnpa3, Akt2, Sulf2                                                                                  |
| ENSMUST00000162401   | miR-337-3p, miR-214-3p                                       | Slc1a2, Klc1                                                                                          |
| ENSMUST00000141539   | miR-214-3p                                                   | Klc1                                                                                                  |

**Table S6.** Information of the upregulated lncRNA-miRNA network in the hippocampus of 7-month-old 5×FAD mice.

| Upregulated lncRNA | miRNA targets |
|--------------------|---------------|
| ENSMUST00000180635 | miR-3059-5p   |
| ENSMUST00000180635 | miR-1943-5p   |
| ENSMUST00000180635 | miR-7016-5p   |
| ENSMUST00000180635 | miR-3089-5p   |
| ENSMUST00000180635 | miR-330-5p    |
| ENSMUST00000180635 | miR-6915-5p   |
| ENSMUST00000180635 | miR-540-3p    |
| ENSMUST00000180635 | miR-1934-3p   |
| ENSMUST00000180635 | miR-505-5p    |
| ENSMUST00000180635 | miR-344g-5p   |
| ENSMUST00000180635 | miR-344d-1-5p |
| ENSMUST00000180635 | miR-344d-3-5p |
| ENSMUST00000180635 | miR-344-5p    |
| ENSMUST00000180635 | miR-3076-5p   |
| ENSMUST00000180635 | miR-7058-3p   |
| ENSMUST00000180635 | miR-669p-5p   |
| ENSMUST00000180635 | miR-31-5p     |
| ENSMUST00000180635 | miR-3072-5p   |
| ENSMUST00000180635 | miR-3068-5p   |
| ENSMUST00000180635 | miR-7055-5p   |
| ENSMUST00000180635 | miR-6979-3p   |
| ENSMUST00000180635 | miR-6918-5p   |
| ENSMUST00000180635 | miR-7687-5p   |
| ENSMUST00000180635 | miR-7231-5p   |
| ENSMUST00000180635 | miR-7029-5p   |
| ENSMUST00000180635 | miR-1968-3p   |
| ENSMUST00000180635 | miR-668-3p    |
| ENSMUST00000180635 | miR-6975-3p   |
| ENSMUST00000180635 | miR-698-5p    |
| ENSMUST00000180635 | miR-7036a-3p  |
| ENSMUST00000180635 | miR-3069-5p   |
| ENSMUST00000180635 | miR-335-3p    |
| ENSMUST00000180635 | miR-6936-5p   |
| ENSMUST00000180635 | miR-5128      |
| ENSMUST00000180635 | miR-1964-5p   |
| ENSMUST00000180635 | miR-6896-3p   |
| ENSMUST00000180635 | miR-664-5p    |
| ENSMUST00000180635 | miR-6987-5p   |
| ENSMUST00000180635 | miR-7115-5p   |
| ENSMUST00000180635 | miR-7093-5p   |
| ENSMUST00000180635 | miR-674-3p    |

---

|                    |             |
|--------------------|-------------|
| ENSMUST00000180635 | miR-3085-3p |
| ENSMUST00000180635 | miR-193a-5p |
| ENSMUST00000180635 | miR-3064-5p |
| ENSMUST00000197854 | miR-1955-5p |
| ENSMUST00000197854 | miR-760-3p  |
| ENSMUST00000197854 | miR-3084-3p |
| ENSMUST00000197854 | miR-302b-3p |
| ENSMUST00000197854 | miR-140-5p  |
| ENSMUST00000197854 | miR-330-5p  |
| ENSMUST00000197854 | miR-673-5p  |
| ENSMUST00000197854 | miR-7a-5p   |
| ENSMUST00000197854 | miR-7b-5p   |
| ENSMUST00000197854 | miR-674-3p  |
| ENSMUST00000197854 | miR-488-3p  |
| ENSMUST00000197854 | miR-181b-5p |
| ENSMUST00000197854 | miR-3102-3p |
| ENSMUST00000197854 | miR-485-5p  |
| ENSMUST00000197854 | miR-1943-5p |
| ENSMUST00000197854 | miR-7016-5p |
| ENSMUST00000197854 | miR-3109-5p |
| ENSMUST00000197854 | miR-5617-3p |
| ENSMUST00000197854 | miR-7214-5p |
| ENSMUST00000197854 | miR-3154    |
| ENSMUST00000197854 | miR-5619-3p |
| ENSMUST00000197854 | miR-7037-5p |
| ENSMUST00000197854 | miR-137-3p  |
| ENSMUST00000197854 | miR-7015-3p |
| ENSMUST00000127786 | miR-1198-5p |
| ENSMUST00000127786 | miR-27b-3p  |
| ENSMUST00000127786 | miR-758-3p  |
| ENSMUST00000127786 | miR-6540-5p |
| ENSMUST00000127786 | miR-23a-3p  |
| ENSMUST00000127786 | miR-23b-3p  |
| ENSMUST00000127786 | miR-145b    |
| ENSMUST00000127786 | miR-145a-5p |
| ENSMUST00000127786 | miR-300-3p  |
| ENSMUST00000127786 | miR-505-5p  |
| ENSMUST00000127786 | miR-362-5p  |
| ENSMUST00000127786 | miR-302b-3p |
| ENSMUST00000127786 | miR-221-3p  |
| ENSMUST00000127786 | miR-222-3p  |
| ENSMUST00000127786 | miR-26a-5p  |
| ENSMUST00000127786 | miR-140-5p  |
| ENSMUST00000127786 | miR-338-5p  |

---

---

|                    |               |
|--------------------|---------------|
| ENSMUST00000127786 | let-7i-5p     |
| ENSMUST00000127786 | let-7d-5p     |
| ENSMUST00000127786 | let-7a-5p     |
| ENSMUST00000127786 | let-7e-5p     |
| ENSMUST00000127786 | let-7f-5p     |
| ENSMUST00000127786 | miR-98-5p     |
| ENSMUST00000127786 | let-7g-5p     |
| ENSMUST00000127786 | miR-664-3p    |
| ENSMUST00000127786 | miR-384-3p    |
| ENSMUST00000127786 | miR-501-3p    |
| ENSMUST00000127786 | miR-3064-5p   |
| ENSMUST00000127786 | miR-3085-3p   |
| ENSMUST00000127786 | miR-664-5p    |
| ENSMUST00000127786 | miR-137-3p    |
| ENSMUST00000127786 | miR-3098-5p   |
| ENSMUST00000127786 | miR-1943-5p   |
| ENSMUST00000127786 | miR-7016-5p   |
| ENSMUST00000127786 | miR-344d-1-5p |
| ENSMUST00000127786 | miR-344d-3-5p |
| ENSMUST00000127786 | miR-344g-5p   |
| ENSMUST00000127786 | miR-450a-2-3p |
| ENSMUST00000127786 | miR-471-5p    |
| ENSMUST00000127786 | miR-470-5p    |
| ENSMUST00000127786 | miR-3059-5p   |
| ENSMUST00000127786 | miR-342-3p    |
| ENSMUST00000127786 | miR-377-3p    |
| ENSMUST00000127786 | miR-425-5p    |
| ENSMUST00000127786 | miR-489-3p    |
| ENSMUST00000127786 | miR-493-5p    |
| ENSMUST00000127786 | miR-466b-3p   |
| ENSMUST00000127786 | miR-466c-3p   |
| ENSMUST00000127786 | miR-466p-3p   |
| ENSMUST00000127786 | miR-466m-3p   |
| ENSMUST00000127786 | miR-466o-3p   |
| ENSMUST00000127786 | miR-494-3p    |
| ENSMUST00000127786 | miR-539-5p    |
| ENSMUST00000127786 | miR-411-3p    |
| ENSMUST00000127786 | miR-379-3p    |
| ENSMUST00000127786 | miR-186-5p    |
| ENSMUST00000127786 | miR-344-5p    |
| ENSMUST00000127786 | miR-340-5p    |
| ENSMUST00000127786 | miR-9-3p      |
| ENSMUST00000127786 | miR-148a-3p   |
| ENSMUST00000127786 | miR-148b-3p   |

---

---

|                    |             |
|--------------------|-------------|
| ENSMUST00000127786 | miR-30a-5p  |
| ENSMUST00000127786 | miR-30e-5p  |
| ENSMUST00000127786 | miR-30d-5p  |
| ENSMUST00000127786 | miR-30c-5p  |
| ENSMUST00000127786 | miR-384-5p  |
| ENSMUST00000127786 | miR-185-5p  |
| ENSMUST00000127786 | miR-331-3p  |
| ENSMUST00000127786 | miR-146b-5p |
| ENSMUST00000127786 | miR-31-5p   |
| ENSMUST00000127786 | miR-1971    |
| ENSMUST00000127786 | miR-1981-5p |
| ENSMUST00000127786 | miR-1933-3p |
| ENSMUST00000127786 | miR-29b-3p  |
| ENSMUST00000127786 | miR-29a-3p  |
| ENSMUST00000127786 | miR-466d-3p |
| ENSMUST00000127786 | miR-467g    |
| ENSMUST00000127786 | miR-466a-3p |
| ENSMUST00000127786 | miR-466e-3p |
| ENSMUST00000127786 | miR-3102-3p |
| ENSMUST00000127786 | miR-133a-3p |
| ENSMUST00000127786 | miR-486a-5p |
| ENSMUST00000127786 | miR-486b-5p |
| ENSMUST00000127786 | miR-191-5p  |
| ENSMUST00000127786 | miR-106a-5p |
| ENSMUST00000127786 | miR-20a-5p  |
| ENSMUST00000127786 | miR-7a-5p   |
| ENSMUST00000127786 | miR-7b-5p   |
| ENSMUST00000127786 | miR-125a-5p |
| ENSMUST00000127786 | miR-125b-5p |
| ENSMUST00000127786 | miR-351-5p  |
| ENSMUST00000127786 | miR-301a-3p |
| ENSMUST00000127786 | miR-19b-3p  |
| ENSMUST00000127786 | miR-19a-3p  |
| ENSMUST00000127786 | miR-488-3p  |
| ENSMUST00000127786 | miR-743b-3p |
| ENSMUST00000127786 | miR-679-3p  |
| ENSMUST00000127786 | miR-582-5p  |
| ENSMUST00000127786 | miR-350-5p  |
| ENSMUST00000127786 | miR-3093-3p |
| ENSMUST00000127786 | miR-329-5p  |
| ENSMUST00000127786 | miR-3083-5p |
| ENSMUST00000127786 | miR-346-3p  |
| ENSMUST00000127786 | miR-361-5p  |
| ENSMUST00000127786 | miR-127-3p  |

---

---

|                    |              |
|--------------------|--------------|
| ENSMUST00000127786 | miR-3087-3p  |
| ENSMUST00000127786 | miR-615-3p   |
| ENSMUST00000127786 | miR-129-2-3p |
| ENSMUST00000127786 | miR-129-1-3p |
| ENSMUST00000127786 | miR-329-3p   |
| ENSMUST00000127786 | miR-3078-5p  |
| ENSMUST00000127786 | miR-15b-5p   |
| ENSMUST00000127786 | miR-322-5p   |
| ENSMUST00000127786 | miR-1197-3p  |
| ENSMUST00000127786 | miR-6919-5p  |
| ENSMUST00000127786 | miR-152-5p   |
| ENSMUST00000127786 | miR-3473d    |
| ENSMUST00000127786 | miR-6984-5p  |
| ENSMUST00000127786 | miR-665-5p   |
| ENSMUST00000127786 | miR-7092-3p  |
| ENSMUST00000127786 | miR-330-3p   |
| ENSMUST00000127786 | miR-383-3p   |
| ENSMUST00000127786 | miR-1948-5p  |
| ENSMUST00000127786 | miR-30c-2-3p |
| ENSMUST00000127786 | miR-760-5p   |
| ENSMUST00000127786 | miR-103-3p   |
| ENSMUST00000127786 | miR-880-3p   |
| ENSMUST00000127786 | miR-465a-5p  |
| ENSMUST00000127786 | miR-7116-5p  |
| ENSMUST00000127786 | miR-6371     |
| ENSMUST00000127786 | miR-543-3p   |
| ENSMUST00000127786 | miR-1191a    |
| ENSMUST00000127786 | miR-6936-5p  |
| ENSMUST00000127786 | miR-221-5p   |
| ENSMUST00000127786 | miR-673-5p   |
| ENSMUST00000127786 | miR-135a-5p  |
| ENSMUST00000127786 | miR-129b-3p  |
| ENSMUST00000127786 | miR-1191b-5p |
| ENSMUST00000127786 | miR-543-5p   |
| ENSMUST00000127786 | miR-3069-5p  |
| ENSMUST00000127786 | miR-3066-5p  |
| ENSMUST00000127786 | miR-6933-3p  |
| ENSMUST00000127786 | miR-201-5p   |
| ENSMUST00000127786 | miR-551b-5p  |
| ENSMUST00000127786 | miR-217-5p   |
| ENSMUST00000127786 | miR-410-3p   |
| ENSMUST00000127786 | miR-6918-5p  |
| ENSMUST00000127786 | miR-148b-5p  |
| ENSMUST00000127786 | miR-423-5p   |

---

---

|                    |              |
|--------------------|--------------|
| ENSMUST00000127786 | miR-7080-3p  |
| ENSMUST00000127786 | miR-3057-5p  |
| ENSMUST00000127786 | miR-7655-3p  |
| ENSMUST00000127786 | miR-344b-3p  |
| ENSMUST00000127786 | miR-20a-3p   |
| ENSMUST00000127786 | miR-7665-5p  |
| ENSMUST00000127786 | miR-6896-5p  |
| ENSMUST00000127786 | miR-3089-5p  |
| ENSMUST00000127786 | miR-7675-3p  |
| ENSMUST00000127786 | miR-6911-5p  |
| ENSMUST00000127786 | miR-7674-3p  |
| ENSMUST00000127786 | miR-3967     |
| ENSMUST00000127786 | miR-1927     |
| ENSMUST00000127786 | miR-1946b    |
| ENSMUST00000127786 | miR-3086-3p  |
| ENSMUST00000127786 | miR-421-3p   |
| ENSMUST00000127786 | miR-153-3p   |
| ENSMUST00000127786 | miR-338-3p   |
| ENSMUST00000127786 | miR-128-3p   |
| ENSMUST00000127786 | miR-6982-5p  |
| ENSMUST00000127786 | miR-330-5p   |
| ENSMUST00000127786 | miR-381-3p   |
| ENSMUST00000127786 | miR-6899-3p  |
| ENSMUST00000127786 | miR-6976-5p  |
| ENSMUST00000127786 | miR-6896-3p  |
| ENSMUST00000127786 | miR-694      |
| ENSMUST00000127786 | miR-5617-5p  |
| ENSMUST00000127786 | miR-3069-3p  |
| ENSMUST00000127786 | miR-3094-3p  |
| ENSMUST00000127786 | miR-344e-3p  |
| ENSMUST00000127786 | miR-5709-5p  |
| ENSMUST00000127786 | miR-493-3p   |
| ENSMUST00000127786 | miR-7236-3p  |
| ENSMUST00000127786 | miR-1843a-5p |
| ENSMUST00000127786 | miR-192-5p   |
| ENSMUST00000127786 | miR-1912-3p  |
| ENSMUST00000127786 | miR-210-5p   |
| ENSMUST00000127786 | miR-7054-5p  |
| ENSMUST00000127786 | miR-6537-3p  |
| ENSMUST00000127786 | miR-8113     |
| ENSMUST00000127786 | miR-505-3p   |
| ENSMUST00000127786 | miR-7019-5p  |
| ENSMUST00000127786 | miR-501-5p   |
| ENSMUST00000127786 | miR-6539     |

---



---

|                    |               |
|--------------------|---------------|
| ENSMUST00000127786 | miR-125b-2-3p |
| ENSMUST00000127786 | let-7f-2-3p   |
| ENSMUST00000127786 | miR-669l-5p   |
| ENSMUST00000127786 | miR-335-3p    |
| ENSMUST00000127786 | miR-7013-3p   |
| ENSMUST00000127786 | miR-409-5p    |
| ENSMUST00000127786 | miR-503-3p    |
| ENSMUST00000127786 | miR-5621-3p   |
| ENSMUST00000127786 | miR-382-3p    |
| ENSMUST00000127786 | miR-6979-3p   |
| ENSMUST00000127786 | miR-6906-5p   |
| ENSMUST00000127786 | miR-3109-5p   |
| ENSMUST00000127786 | miR-3970      |
| ENSMUST00000127786 | miR-1955-3p   |
| ENSMUST00000127786 | miR-1931      |
| ENSMUST00000127786 | miR-345-5p    |
| ENSMUST00000127786 | miR-7056-3p   |
| ENSMUST00000127786 | miR-674-3p    |
| ENSMUST00000127786 | miR-544-3p    |
| ENSMUST00000127786 | miR-7117-5p   |
| ENSMUST00000127786 | miR-7226-3p   |
| ENSMUST00000127786 | miR-3074-1-3p |
| ENSMUST00000127786 | miR-1969      |
| ENSMUST00000127786 | miR-299a-5p   |
| ENSMUST00000127786 | miR-8111      |
| ENSMUST00000127786 | miR-344d-2-5p |
| ENSMUST00000127786 | miR-3095-3p   |
| ENSMUST00000127786 | miR-215-5p    |
| ENSMUST00000127786 | miR-3154      |
| ENSMUST00000127786 | miR-155-3p    |
| ENSMUST00000127786 | miR-3475-3p   |
| ENSMUST00000127786 | miR-7015-3p   |
| ENSMUST00000127786 | miR-3112-5p   |
| ENSMUST00000127786 | miR-7037-5p   |
| ENSMUST00000127786 | miR-669e-5p   |
| ENSMUST00000127786 | miR-511-5p    |
| ENSMUST00000127786 | miR-669a-5p   |
| ENSMUST00000127786 | miR-669p-5p   |
| ENSMUST00000127786 | miR-1298-3p   |
| ENSMUST00000127786 | miR-6937-3p   |
| ENSMUST00000127786 | miR-107-5p    |
| ENSMUST00000127786 | miR-6914-3p   |
| ENSMUST00000127786 | miR-7116-3p   |
| ENSMUST00000127786 | miR-7013-5p   |

---

---

|                    |             |
|--------------------|-------------|
| ENSMUST00000127786 | miR-8114    |
| ENSMUST00000127786 | miR-30f     |
| ENSMUST00000127786 | miR-187-5p  |
| ENSMUST00000127786 | miR-541-3p  |
| ENSMUST00000127786 | miR-3086-5p |
| ENSMUST00000127786 | miR-344c-3p |
| ENSMUST00000127786 | miR-874-3p  |
| ENSMUST00000127786 | miR-216b-5p |
| ENSMUST00000127786 | miR-21a-3p  |
| ENSMUST00000127786 | miR-1983    |
| ENSMUST00000127786 | miR-6902-3p |
| ENSMUST00000127786 | miR-411-5p  |
| ENSMUST00000127786 | miR-181b-5p |
| ENSMUST00000127786 | miR-222-5p  |
| ENSMUST00000127786 | miR-6911-3p |
| ENSMUST00000127786 | miR-412-3p  |
| ENSMUST00000127786 | miR-7682-3p |
| ENSMUST00000127786 | miR-7077-5p |
| ENSMUST00000127786 | miR-3062-5p |
| ENSMUST00000127786 | miR-540-5p  |
| ENSMUST00000127786 | miR-328-3p  |
| ENSMUST00000127786 | miR-7038-3p |
| ENSMUST00000127786 | miR-431-3p  |
| ENSMUST00000127786 | miR-6913-5p |
| ENSMUST00000127786 | miR-7039-3p |
| ENSMUST00000127786 | miR-186-3p  |
| ENSMUST00000127786 | miR-6991-5p |
| ENSMUST00000127786 | miR-344-3p  |
| ENSMUST00000127786 | miR-344d-3p |
| ENSMUST00000127786 | miR-203-5p  |
| ENSMUST00000127786 | miR-1b-5p   |
| ENSMUST00000127786 | miR-7115-3p |
| ENSMUST00000127786 | miR-201-3p  |
| ENSMUST00000127786 | miR-3064-3p |
| ENSMUST00000127786 | miR-3058-3p |
| ENSMUST00000127786 | miR-7651-5p |
| ENSMUST00000127786 | miR-693-3p  |
| ENSMUST00000127786 | miR-6975-3p |
| ENSMUST00000127786 | miR-702-5p  |
| ENSMUST00000127786 | miR-345-3p  |
| ENSMUST00000127786 | miR-667-3p  |
| ENSMUST00000127786 | miR-7224-5p |
| ENSMUST00000127786 | miR-5623-5p |
| ENSMUST00000144016 | miR-6989-3p |

---

---

|                    |               |
|--------------------|---------------|
| ENSMUST00000141374 | miR-125b-2-3p |
| ENSMUST00000141374 | let-7a-2-3p   |
| ENSMUST00000141374 | miR-210-5p    |
| ENSMUST00000141374 | miR-5134-5p   |
| ENSMUST00000028291 | miR-3085-3p   |
| ENSMUST00000028291 | miR-3064-5p   |
| ENSMUST00000028291 | miR-344d-2-5p |
| ENSMUST00000028291 | miR-1968-5p   |
| ENSMUST00000028291 | miR-3544-3p   |
| ENSMUST00000028291 | miR-3070-5p   |
| ENSMUST00000028291 | miR-346-3p    |
| ENSMUST00000028291 | miR-667-5p    |
| ENSMUST00000028291 | miR-6987-5p   |
| ENSMUST00000028291 | miR-7685-3p   |
| ENSMUST00000028291 | miR-466k      |
| ENSMUST00000028291 | miR-328-3p    |
| ENSMUST00000028291 | miR-1191a     |
| ENSMUST00000154192 | miR-7069-3p   |
| ENSMUST00000154192 | miR-1968-5p   |
| ENSMUST00000154192 | miR-330-5p    |
| ENSMUST00000154192 | miR-7115-5p   |
| ENSMUST00000154192 | miR-5123      |
| ENSMUST00000154192 | miR-5619-3p   |
| ENSMUST00000153923 | miR-20a-5p    |
| ENSMUST00000153923 | miR-106a-5p   |
| ENSMUST00000153923 | miR-667-5p    |
| ENSMUST00000153923 | miR-6896-5p   |
| ENSMUST00000153923 | miR-322-5p    |
| ENSMUST00000153923 | miR-15b-5p    |
| ENSMUST00000153923 | miR-21a-3p    |
| ENSMUST00000153923 | miR-6979-3p   |
| ENSMUST00000153923 | miR-23b-3p    |
| ENSMUST00000153923 | miR-23a-3p    |
| ENSMUST00000153923 | miR-3473d     |
| ENSMUST00000153923 | miR-694       |
| ENSMUST00000153923 | miR-3094-3p   |
| ENSMUST00000153923 | miR-7093-5p   |
| ENSMUST00000218620 | miR-7651-5p   |
| ENSMUST00000218620 | miR-29b-3p    |
| ENSMUST00000218620 | miR-29a-3p    |
| ENSMUST00000218620 | let-7j        |
| ENSMUST00000218620 | miR-485-5p    |
| ENSMUST00000218620 | miR-6958-3p   |
| ENSMUST00000218620 | miR-125b-2-3p |

---

---

|                    |               |
|--------------------|---------------|
| ENSMUST00000218620 | miR-541-5p    |
| ENSMUST00000218620 | miR-7687-5p   |
| ENSMUST00000218620 | miR-193a-5p   |
| ENSMUST00000218620 | miR-29a-5p    |
| ENSMUST00000211218 | miR-7029-3p   |
| ENSMUST00000150127 | miR-504-3p    |
| ENSMUST00000150127 | miR-664-5p    |
| ENSMUST00000150127 | miR-7054-5p   |
| ENSMUST00000150127 | miR-484       |
| ENSMUST00000150127 | miR-330-5p    |
| ENSMUST00000150127 | miR-7116-3p   |
| ENSMUST00000150127 | miR-7052-3p   |
| ENSMUST00000150127 | miR-383-3p    |
| ENSMUST00000150127 | miR-185-5p    |
| ENSMUST00000150127 | miR-3087-5p   |
| ENSMUST00000150127 | miR-3090-3p   |
| ENSMUST00000150127 | miR-6984-5p   |
| ENSMUST00000150127 | miR-1249-5p   |
| ENSMUST00000150127 | miR-3085-3p   |
| ENSMUST00000150127 | miR-698-5p    |
| ENSMUST00000150127 | miR-329-5p    |
| ENSMUST00000150127 | miR-7671-5p   |
| ENSMUST00000150127 | miR-98-3p     |
| ENSMUST00000150127 | let-7f-1-3p   |
| ENSMUST00000150127 | let-7c-2-3p   |
| ENSMUST00000150127 | let-7a-1-3p   |
| ENSMUST00000150127 | miR-450a-2-3p |
| ENSMUST00000150127 | miR-551b-5p   |
| ENSMUST00000150127 | miR-7093-3p   |
| ENSMUST00000150127 | miR-667-3p    |
| ENSMUST00000150127 | miR-5113      |
| ENSMUST00000150127 | miR-1968-3p   |
| ENSMUST00000150127 | miR-3064-5p   |
| ENSMUST00000150127 | miR-103-3p    |
| ENSMUST00000152985 | miR-5134-5p   |
| ENSMUST00000152985 | miR-6896-3p   |
| ENSMUST00000152985 | miR-344d-2-5p |
| ENSMUST00000152985 | miR-30c-5p    |
| ENSMUST00000152985 | miR-325-3p    |
| ENSMUST00000152985 | miR-29b-1-5p  |
| ENSMUST00000152985 | miR-384-5p    |
| ENSMUST00000152985 | miR-30e-5p    |
| ENSMUST00000152985 | miR-30d-5p    |
| ENSMUST00000152985 | miR-30a-5p    |

---

---

|                    |              |
|--------------------|--------------|
| ENSMUST00000152985 | miR-423-3p   |
| ENSMUST00000152985 | miR-7226-3p  |
| ENSMUST00000152985 | miR-3069-5p  |
| ENSMUST00000152985 | miR-365-3p   |
| ENSMUST00000152985 | miR-7214-5p  |
| ENSMUST00000152985 | miR-5623-5p  |
| ENSMUST00000152985 | miR-7093-3p  |
| ENSMUST00000152985 | miR-6919-5p  |
| ENSMUST00000145174 | miR-7116-3p  |
| ENSMUST00000145174 | miR-185-5p   |
| ENSMUST00000145174 | miR-7055-5p  |
| ENSMUST00000145174 | miR-6900-5p  |
| ENSMUST00000145174 | miR-3083-5p  |
| ENSMUST00000145174 | miR-5617-3p  |
| ENSMUST00000145174 | miR-504-3p   |
| ENSMUST00000132577 | miR-1968-3p  |
| ENSMUST00000132577 | miR-1968-5p  |
| ENSMUST00000132577 | miR-1843b-5p |
| ENSMUST00000132577 | miR-3084-3p  |
| ENSMUST00000132577 | miR-3093-3p  |
| ENSMUST00000132577 | miR-185-5p   |
| ENSMUST00000132577 | miR-666-5p   |
| ENSMUST00000132577 | miR-3097-3p  |
| ENSMUST00000132577 | miR-6912-5p  |
| ENSMUST00000132577 | miR-27b-3p   |
| ENSMUST00000132577 | miR-365-2-5p |
| ENSMUST00000132577 | miR-365-1-5p |
| ENSMUST00000132577 | miR-6946-3p  |
| ENSMUST00000132577 | miR-511-5p   |
| ENSMUST00000132577 | miR-667-5p   |
| MSTRG.11359.1      | miR-365-2-5p |
| MSTRG.11359.1      | miR-365-1-5p |
| MSTRG.11359.1      | miR-3069-3p  |
| MSTRG.11359.1      | miR-3093-3p  |
| MSTRG.17500.2      | miR-466k     |
| MSTRG.17500.2      | miR-7116-3p  |
| MSTRG.17500.2      | miR-466o-3p  |
| MSTRG.17500.2      | miR-466m-3p  |
| MSTRG.17500.2      | miR-7116-5p  |
| MSTRG.17500.2      | miR-6902-5p  |
| MSTRG.17500.2      | miR-7117-5p  |
| MSTRG.17500.2      | miR-6979-3p  |
| MSTRG.17500.2      | miR-6944-3p  |
| MSTRG.17500.2      | miR-3083-5p  |

---

---

|               |               |
|---------------|---------------|
| MSTRG.17500.2 | miR-3059-5p   |
| MSTRG.17500.2 | miR-3090-3p   |
| MSTRG.17500.2 | miR-6940-3p   |
| MSTRG.17500.2 | miR-185-5p    |
| MSTRG.17500.2 | miR-7675-3p   |
| MSTRG.17500.2 | miR-6896-3p   |
| MSTRG.17500.2 | miR-6948-5p   |
| MSTRG.17500.2 | miR-7013-5p   |
| MSTRG.17500.2 | miR-467g      |
| MSTRG.17500.2 | miR-466e-3p   |
| MSTRG.17500.2 | miR-466d-3p   |
| MSTRG.17500.2 | miR-466a-3p   |
| MSTRG.17500.2 | miR-210-5p    |
| MSTRG.17500.2 | miR-664-5p    |
| MSTRG.17500.2 | miR-1194      |
| MSTRG.17500.2 | miR-7214-5p   |
| MSTRG.17500.2 | miR-1968-5p   |
| MSTRG.17500.2 | miR-340-5p    |
| MSTRG.17500.2 | miR-6975-3p   |
| MSTRG.17500.2 | miR-6899-3p   |
| MSTRG.17500.2 | miR-5113      |
| MSTRG.17500.2 | miR-331-3p    |
| MSTRG.17500.2 | miR-1198-5p   |
| MSTRG.17500.2 | miR-3106-3p   |
| MSTRG.17500.2 | miR-365-2-5p  |
| MSTRG.17500.2 | miR-365-1-5p  |
| MSTRG.17500.2 | miR-7227-3p   |
| MSTRG.17500.2 | miR-6908-5p   |
| MSTRG.17500.2 | miR-539-5p    |
| MSTRG.17500.2 | miR-3057-5p   |
| MSTRG.17500.2 | miR-139-5p    |
| MSTRG.17500.2 | miR-450b-5p   |
| MSTRG.17500.2 | miR-6918-5p   |
| MSTRG.17500.2 | miR-342-3p    |
| MSTRG.17500.2 | miR-344g-5p   |
| MSTRG.17500.2 | miR-344d-3-5p |
| MSTRG.17500.2 | miR-344d-1-5p |
| MSTRG.17500.2 | miR-344-5p    |
| MSTRG.17500.2 | miR-3087-3p   |
| MSTRG.17500.2 | miR-344d-2-5p |
| MSTRG.17500.2 | miR-6937-3p   |
| MSTRG.17500.2 | miR-7231-5p   |
| MSTRG.17500.2 | miR-377-3p    |
| MSTRG.17500.2 | miR-7118-5p   |

---

---

|               |               |
|---------------|---------------|
| MSTRG.17500.2 | miR-363-5p    |
| MSTRG.17500.2 | miR-3076-5p   |
| MSTRG.17500.2 | miR-1964-5p   |
| MSTRG.17500.2 | miR-5619-3p   |
| MSTRG.17500.2 | miR-6946-3p   |
| MSTRG.17500.2 | miR-7026-5p   |
| MSTRG.17500.2 | miR-6952-3p   |
| MSTRG.17500.2 | miR-1839-5p   |
| MSTRG.17500.2 | miR-7243-3p   |
| MSTRG.17500.2 | miR-433-5p    |
| MSTRG.17500.2 | miR-6900-3p   |
| MSTRG.17500.2 | miR-346-3p    |
| MSTRG.17500.2 | miR-7224-5p   |
| MSTRG.17500.2 | miR-694       |
| MSTRG.17500.2 | miR-338-5p    |
| MSTRG.17500.2 | miR-301b-5p   |
| MSTRG.17500.2 | miR-301a-5p   |
| MSTRG.17500.2 | miR-145b      |
| MSTRG.17500.2 | miR-145a-5p   |
| MSTRG.17500.2 | miR-133a-5p   |
| MSTRG.17500.2 | miR-450a-2-3p |
| MSTRG.17500.2 | miR-1249-5p   |
| MSTRG.17500.2 | miR-7052-3p   |
| MSTRG.17500.2 | miR-6951-5p   |
| MSTRG.17500.2 | miR-466p-3p   |
| MSTRG.17500.2 | miR-466c-3p   |
| MSTRG.17500.2 | miR-466b-3p   |
| MSTRG.17500.2 | miR-7063-5p   |
| MSTRG.17500.2 | miR-329-3p    |
| MSTRG.17500.2 | miR-6958-3p   |
| MSTRG.17500.2 | miR-344i      |
| MSTRG.17500.2 | miR-1193-3p   |
| MSTRG.17500.2 | miR-7084-5p   |
| MSTRG.17500.2 | miR-7015-3p   |
| MSTRG.17500.2 | miR-493-5p    |
| MSTRG.17500.2 | miR-7093-3p   |
| MSTRG.17500.2 | miR-6994-5p   |
| MSTRG.17500.2 | miR-551b-5p   |
| MSTRG.17500.2 | miR-7077-3p   |
| MSTRG.17500.2 | miR-433-3p    |
| MSTRG.17500.2 | miR-1943-5p   |
| MSTRG.17500.2 | miR-3064-3p   |
| MSTRG.17500.2 | miR-330-5p    |
| MSTRG.17500.2 | miR-383-3p    |

---

---

|               |             |
|---------------|-------------|
| MSTRG.17500.2 | miR-7016-3p |
| MSTRG.17500.2 | miR-7065-3p |
| MSTRG.17500.2 | miR-706     |
| MSTRG.17500.2 | miR-222-5p  |
| MSTRG.17500.2 | miR-1948-5p |
| MSTRG.17500.2 | miR-3085-3p |
| MSTRG.17500.2 | miR-3064-5p |
| MSTRG.17500.2 | miR-3112-3p |
| MSTRG.17500.2 | miR-935     |
| MSTRG.17500.2 | miR-300-3p  |
| MSTRG.17500.2 | miR-152-5p  |
| MSTRG.17500.2 | miR-15b-5p  |
| MSTRG.17500.2 | miR-98-5p   |
| MSTRG.17500.2 | let-7i-5p   |
| MSTRG.17500.2 | let-7g-5p   |
| MSTRG.17500.2 | let-7f-5p   |
| MSTRG.17500.2 | let-7e-5p   |
| MSTRG.17500.2 | let-7a-5p   |
| MSTRG.17500.2 | miR-148b-3p |
| MSTRG.17500.2 | miR-148a-3p |
| MSTRG.17500.2 | miR-3094-3p |
| MSTRG.17500.2 | miR-1941-3p |
| MSTRG.17500.2 | miR-1983    |
| MSTRG.17500.2 | miR-6912-5p |
| MSTRG.17500.2 | miR-488-5p  |
| MSTRG.17500.2 | miR-7658-3p |
| MSTRG.17500.2 | miR-322-5p  |
| MSTRG.17500.2 | miR-412-3p  |
| MSTRG.17500.2 | miR-6953-3p |
| MSTRG.17500.2 | miR-877-5p  |
| MSTRG.17500.2 | miR-3066-3p |
| MSTRG.17500.2 | miR-8107    |
| MSTRG.17500.2 | miR-365-3p  |
| MSTRG.17500.2 | miR-7077-5p |
| MSTRG.17500.2 | miR-7689-3p |
| MSTRG.17500.2 | miR-3084-3p |
| MSTRG.17500.2 | miR-698-5p  |
| MSTRG.17500.2 | miR-6948-3p |
| MSTRG.17500.2 | miR-7016-5p |
| MSTRG.17500.2 | miR-384-3p  |
| MSTRG.17500.2 | miR-377-5p  |
| MSTRG.17500.2 | let-7d-5p   |
| MSTRG.17500.2 | miR-7055-3p |
| MSTRG.17500.2 | miR-370-5p  |

---



---

|               |             |
|---------------|-------------|
| MSTRG.17500.2 | miR-7656-5p |
| MSTRG.17500.2 | let-7j      |
| MSTRG.17500.2 | miR-673-5p  |
| MSTRG.17500.2 | miR-873a-3p |
| MSTRG.17500.2 | miR-346-5p  |
| MSTRG.17500.2 | miR-361-3p  |
| MSTRG.17500.2 | miR-186-5p  |
| MSTRG.16327.2 | miR-466k    |
| MSTRG.16327.2 | miR-28c     |
| MSTRG.16327.2 | miR-28b     |
| MSTRG.16327.2 | miR-23b-3p  |
| MSTRG.16327.2 | miR-23a-3p  |
| MSTRG.16327.2 | miR-3057-5p |
| MSTRG.16327.2 | miR-7666-3p |
| MSTRG.16327.2 | miR-6913-5p |
| MSTRG.16327.2 | miR-30f     |
| MSTRG.16327.2 | miR-7651-5p |
| MSTRG.16327.2 | miR-1964-5p |
| MSTRG.6530.1  | miR-338-3p  |
| MSTRG.6530.1  | miR-98-3p   |
| MSTRG.6530.1  | let-7f-1-3p |
| MSTRG.6530.1  | let-7c-2-3p |
| MSTRG.6530.1  | let-7a-1-3p |
| MSTRG.6530.1  | miR-5134-5p |
| MSTRG.6530.1  | miR-6970-3p |
| MSTRG.6530.1  | miR-1912-3p |
| MSTRG.6530.1  | miR-186-5p  |
| MSTRG.6775.12 | miR-466o-3p |
| MSTRG.6775.12 | miR-466m-3p |
| MSTRG.6775.12 | miR-466p-3p |
| MSTRG.6775.12 | miR-466c-3p |
| MSTRG.6775.12 | miR-466b-3p |
| MSTRG.6775.12 | miR-467g    |
| MSTRG.6775.12 | miR-7116-3p |
| MSTRG.6775.12 | miR-466e-3p |
| MSTRG.6775.12 | miR-466d-3p |
| MSTRG.6775.12 | miR-466a-3p |
| MSTRG.6775.12 | miR-1b-5p   |
| MSTRG.6775.12 | miR-466k    |
| MSTRG.6775.12 | miR-5619-5p |
| MSTRG.6775.12 | miR-6951-5p |
| MSTRG.6775.12 | miR-15b-3p  |
| MSTRG.6775.12 | miR-6944-3p |
| MSTRG.6775.12 | miR-376b-5p |

---

---

|               |             |
|---------------|-------------|
| MSTRG.6775.12 | miR-494-3p  |
| MSTRG.6775.12 | miR-7041-5p |
| MSTRG.6775.12 | miR-383-5p  |
| MSTRG.6775.12 | miR-219c-3p |
| MSTRG.6775.12 | miR-544-3p  |
| MSTRG.6775.12 | miR-6940-3p |
| MSTRG.6775.12 | miR-361-5p  |
| MSTRG.6775.12 | miR-411-5p  |
| MSTRG.6775.12 | miR-137-3p  |
| MSTRG.6775.12 | miR-7092-3p |
| MSTRG.6775.12 | miR-1198-5p |
| MSTRG.6775.12 | miR-6946-3p |
| MSTRG.6775.12 | miR-3094-3p |
| MSTRG.6775.12 | miR-450b-5p |
| MSTRG.6775.12 | miR-3084-3p |
| MSTRG.6775.12 | miR-694     |
| MSTRG.6775.12 | miR-29a-5p  |
| MSTRG.6775.12 | miR-467f    |
| MSTRG.6775.12 | miR-7015-3p |
| MSTRG.6775.12 | miR-338-3p  |
| MSTRG.6775.12 | miR-329-3p  |
| MSTRG.6775.12 | miR-6896-3p |
| MSTRG.6775.12 | miR-3069-5p |
| MSTRG.6775.12 | miR-664-3p  |
| MSTRG.6775.12 | miR-7a-1-3p |
| MSTRG.6775.12 | miR-7018-3p |
| MSTRG.6775.12 | miR-3066-3p |
| MSTRG.6775.12 | miR-7116-5p |
| MSTRG.6775.12 | miR-7669-5p |
| MSTRG.6775.12 | miR-881-3p  |
| MSTRG.6775.12 | miR-7668-5p |
| MSTRG.6775.12 | miR-7092-5p |
| MSTRG.6775.12 | miR-186-5p  |
| MSTRG.6775.12 | miR-1231-3p |
| MSTRG.6775.12 | miR-679-5p  |
| MSTRG.6775.12 | miR-410-3p  |
| MSTRG.6775.12 | miR-5123    |
| MSTRG.6775.12 | miR-3061-5p |
| MSTRG.6775.12 | miR-344h-5p |
| MSTRG.6775.12 | miR-344e-5p |
| MSTRG.6775.12 | miR-668-3p  |
| MSTRG.6775.12 | miR-1927    |
| MSTRG.6775.12 | miR-7689-3p |
| MSTRG.6775.12 | miR-7019-5p |

---

---

|               |               |
|---------------|---------------|
| MSTRG.6775.12 | miR-6979-3p   |
| MSTRG.6775.12 | miR-543-3p    |
| MSTRG.6775.12 | miR-551b-5p   |
| MSTRG.6775.12 | miR-1929-5p   |
| MSTRG.6775.12 | miR-152-5p    |
| MSTRG.6775.12 | miR-880-3p    |
| MSTRG.6775.12 | miR-7013-5p   |
| MSTRG.6775.12 | miR-7118-3p   |
| MSTRG.6775.12 | miR-3058-3p   |
| MSTRG.6775.12 | miR-3535      |
| MSTRG.6775.12 | miR-7655-3p   |
| MSTRG.6775.12 | miR-365-3p    |
| MSTRG.6775.12 | miR-7063-5p   |
| MSTRG.6775.12 | miR-421-3p    |
| MSTRG.6775.12 | miR-7227-3p   |
| MSTRG.6775.12 | miR-6915-5p   |
| MSTRG.6775.12 | miR-540-3p    |
| MSTRG.6775.12 | miR-344g-5p   |
| MSTRG.6775.12 | miR-344d-3-5p |
| MSTRG.6775.12 | miR-344d-1-5p |
| MSTRG.6775.12 | miR-344-5p    |
| MSTRG.10674.1 | miR-466k      |
| MSTRG.10674.1 | miR-6901-5p   |
| MSTRG.10674.1 | miR-466p-3p   |
| MSTRG.10674.1 | miR-466c-3p   |
| MSTRG.10674.1 | miR-466b-3p   |
| MSTRG.10674.1 | miR-466m-3p   |
| MSTRG.10674.1 | miR-7054-5p   |
| MSTRG.10674.1 | miR-7116-3p   |
| MSTRG.10674.1 | miR-466o-3p   |
| MSTRG.10674.1 | miR-6540-5p   |
| MSTRG.10674.1 | miR-383-3p    |
| MSTRG.10674.1 | miR-6946-3p   |
| MSTRG.10674.1 | miR-30f       |
| MSTRG.10674.1 | miR-467f      |
| MSTRG.10674.1 | miR-7092-5p   |
| MSTRG.10674.1 | miR-7026-5p   |
| MSTRG.10674.1 | miR-582-3p    |
| MSTRG.10674.1 | miR-6912-5p   |
| MSTRG.10674.1 | miR-377-3p    |
| MSTRG.10674.1 | miR-6979-3p   |
| MSTRG.10674.1 | miR-3059-5p   |
| MSTRG.10674.1 | miR-8113      |
| MSTRG.10674.1 | miR-7012-5p   |

---

---

|               |             |
|---------------|-------------|
| MSTRG.10674.1 | miR-342-3p  |
| MSTRG.10674.1 | miR-6902-5p |
| MSTRG.10674.1 | miR-329-3p  |
| MSTRG.10674.1 | miR-7b-5p   |
| MSTRG.10674.1 | miR-7a-5p   |
| MSTRG.10674.1 | miR-7227-3p |
| MSTRG.10674.1 | miR-7116-5p |
| MSTRG.10674.1 | miR-1198-5p |
| MSTRG.10674.1 | miR-185-5p  |
| MSTRG.10674.1 | miR-6900-5p |
| MSTRG.10674.1 | miR-6906-5p |
| MSTRG.10674.1 | miR-201-5p  |
| MSTRG.10674.1 | miR-706     |
| MSTRG.17055.1 | miR-495-3p  |
| MSTRG.17055.1 | miR-3112-5p |
| MSTRG.17055.1 | miR-466o-3p |
| MSTRG.17055.1 | miR-466m-3p |
| MSTRG.17055.1 | miR-706     |
| MSTRG.17055.1 | miR-351-5p  |
| MSTRG.17055.1 | miR-125b-5p |
| MSTRG.17055.1 | miR-125a-5p |
| MSTRG.17055.1 | miR-374c-3p |
| MSTRG.17055.1 | miR-3070-3p |
| MSTRG.17055.1 | miR-381-3p  |
| MSTRG.17055.1 | miR-7026-5p |
| MSTRG.17055.1 | miR-488-5p  |
| MSTRG.17055.1 | miR-338-3p  |
| MSTRG.17055.1 | miR-346-3p  |
| MSTRG.17055.1 | miR-7116-3p |
| MSTRG.17055.1 | miR-466p-3p |
| MSTRG.17055.1 | miR-466c-3p |
| MSTRG.17055.1 | miR-466b-3p |
| MSTRG.17055.1 | miR-760-5p  |
| MSTRG.17055.1 | miR-673-5p  |
| MSTRG.17055.1 | miR-383-3p  |
| MSTRG.17055.1 | miR-5621-3p |
| MSTRG.14838.1 | miR-3084-3p |
| MSTRG.14838.1 | miR-7214-5p |
| MSTRG.14838.1 | miR-377-5p  |
| MSTRG.14838.1 | miR-7671-5p |
| MSTRG.14838.1 | miR-346-3p  |
| MSTRG.1243.32 | miR-7226-3p |
| MSTRG.1243.32 | miR-467g    |
| MSTRG.1243.32 | miR-466o-3p |

---

---

|               |              |
|---------------|--------------|
| MSTRG.1243.32 | miR-466m-3p  |
| MSTRG.1243.32 | miR-706      |
| MSTRG.1243.32 | miR-1b-5p    |
| MSTRG.1243.32 | miR-466e-3p  |
| MSTRG.1243.32 | miR-466d-3p  |
| MSTRG.1243.32 | miR-466a-3p  |
| MSTRG.1243.32 | miR-7092-3p  |
| MSTRG.1243.32 | miR-3967     |
| MSTRG.1243.32 | miR-222-3p   |
| MSTRG.1243.32 | miR-221-3p   |
| MSTRG.1243.32 | miR-466p-3p  |
| MSTRG.1243.32 | miR-466c-3p  |
| MSTRG.1243.32 | miR-466b-3p  |
| MSTRG.1243.32 | miR-7054-5p  |
| MSTRG.1243.32 | miR-484      |
| MSTRG.1243.32 | miR-181b-5p  |
| MSTRG.1243.32 | miR-6913-5p  |
| MSTRG.1243.32 | miR-7052-3p  |
| MSTRG.1243.32 | miR-7027-5p  |
| MSTRG.1243.32 | miR-329-3p   |
| MSTRG.1243.32 | miR-383-3p   |
| MSTRG.1243.32 | miR-6946-3p  |
| MSTRG.1243.32 | miR-504-3p   |
| MSTRG.1243.32 | miR-6958-3p  |
| MSTRG.1243.32 | miR-30c-2-3p |
| MSTRG.1243.32 | miR-7116-3p  |
| MSTRG.1243.32 | miR-7b-5p    |
| MSTRG.1243.32 | miR-7a-5p    |
| MSTRG.1243.32 | miR-187-5p   |
| MSTRG.1243.32 | miR-1194     |
| MSTRG.1243.32 | miR-7669-5p  |
| MSTRG.1243.32 | miR-7015-5p  |
| MSTRG.1243.32 | miR-7115-3p  |
| MSTRG.1243.32 | miR-702-5p   |
| MSTRG.1243.32 | miR-335-3p   |
| MSTRG.1243.32 | miR-6902-3p  |
| MSTRG.1243.32 | miR-760-5p   |
| MSTRG.1243.32 | miR-501-5p   |
| MSTRG.1243.32 | miR-128-3p   |
| MSTRG.1243.32 | miR-6539     |
| MSTRG.1243.32 | miR-664-3p   |
| MSTRG.1243.32 | miR-743b-3p  |
| MSTRG.1243.32 | miR-488-3p   |
| MSTRG.1243.32 | miR-6983-5p  |

---

---

|               |               |
|---------------|---------------|
| MSTRG.1243.32 | miR-551b-5p   |
| MSTRG.1243.32 | miR-3068-5p   |
| MSTRG.1243.32 | miR-6911-5p   |
| MSTRG.1243.32 | miR-7055-5p   |
| MSTRG.1243.32 | miR-874-3p    |
| MSTRG.1243.32 | miR-8113      |
| MSTRG.1243.32 | miR-7012-5p   |
| MSTRG.1243.32 | miR-412-3p    |
| MSTRG.1243.32 | miR-148b-3p   |
| MSTRG.1243.32 | miR-148a-3p   |
| MSTRG.1243.32 | miR-7668-5p   |
| MSTRG.1243.32 | miR-330-5p    |
| MSTRG.1243.32 | miR-338-3p    |
| MSTRG.1243.32 | miR-1983      |
| MSTRG.1243.32 | miR-7081-3p   |
| MSTRG.1243.32 | miR-219a-1-3p |
| MSTRG.1243.32 | miR-6901-5p   |
| MSTRG.1243.32 | miR-222-5p    |
| MSTRG.1243.32 | miR-365-3p    |
| MSTRG.1243.32 | miR-7043-3p   |
| MSTRG.1243.32 | miR-1981-3p   |
| MSTRG.1243.32 | miR-7018-3p   |
| MSTRG.1243.32 | miR-3090-3p   |
| MSTRG.1243.32 | miR-539-5p    |
| MSTRG.1243.32 | miR-129b-3p   |
| MSTRG.1243.32 | miR-495-5p    |
| MSTRG.1243.32 | miR-3082-3p   |
| MSTRG.1243.32 | miR-186-5p    |
| MSTRG.1243.32 | miR-1291      |
| MSTRG.1243.32 | let-7f-2-3p   |
| MSTRG.1243.32 | miR-7227-3p   |
| MSTRG.1243.32 | miR-679-5p    |
| MSTRG.1243.32 | miR-6991-5p   |
| MSTRG.1243.32 | miR-1668      |
| MSTRG.1243.32 | miR-673-5p    |
| MSTRG.1243.32 | miR-6918-5p   |
| MSTRG.1243.32 | miR-345-3p    |
| MSTRG.1243.32 | miR-139-5p    |
| MSTRG.1243.32 | miR-7651-5p   |
| MSTRG.1243.32 | miR-330-3p    |
| MSTRG.1243.32 | miR-298-3p    |
| MSTRG.1243.32 | miR-7665-5p   |

---

**Table S7.** Information of the downregulated lncRNA-miRNA network in the hippocampus of 7-month-old 5×FAD mice.

| Downregulated lncRNA | miRNA targets |
|----------------------|---------------|
| ENSMUST00000184170   | miR-743a-3p   |
| ENSMUST00000184170   | miR-669b-5p   |
| ENSMUST00000184170   | miR-214-3p    |
| ENSMUST00000184170   | miR-3079-3p   |
| ENSMUST00000184170   | miR-24-3p     |
| ENSMUST00000184170   | miR-3060-3p   |
| ENSMUST00000184170   | miR-195a-5p   |
| ENSMUST00000184170   | miR-6419      |
| ENSMUST00000184170   | miR-15a-5p    |
| ENSMUST00000184170   | miR-16-5p     |
| ENSMUST00000184170   | miR-497a-5p   |
| ENSMUST00000184170   | miR-195b      |
| ENSMUST00000184170   | miR-3065-5p   |
| ENSMUST00000184170   | miR-193a-3p   |
| ENSMUST00000184170   | miR-193b-3p   |
| ENSMUST00000184170   | miR-465a-3p   |
| ENSMUST00000184170   | miR-465b-3p   |
| ENSMUST00000184170   | miR-465c-3p   |
| ENSMUST00000184170   | miR-18a-5p    |
| ENSMUST00000184170   | miR-7010-5p   |
| ENSMUST00000184170   | miR-7075-5p   |
| ENSMUST00000184170   | miR-8120      |
| ENSMUST00000184170   | miR-127-5p    |
| ENSMUST00000184170   | miR-7211-3p   |
| ENSMUST00000184170   | miR-151-5p    |
| ENSMUST00000197200   | miR-7008-3p   |
| ENSMUST00000197200   | miR-5101      |
| ENSMUST00000197200   | miR-6715-5p   |
| ENSMUST00000197200   | miR-320-3p    |
| ENSMUST00000197200   | miR-3093-5p   |
| ENSMUST00000197200   | miR-3470b     |
| ENSMUST00000197200   | miR-6384      |
| ENSMUST00000197200   | miR-6986-5p   |
| ENSMUST00000197200   | miR-7000-3p   |
| ENSMUST00000197200   | miR-5616-5p   |
| ENSMUST00000197200   | miR-7674-5p   |
| ENSMUST00000197200   | miR-669b-5p   |
| ENSMUST00000197200   | miR-7010-5p   |
| ENSMUST00000197200   | miR-6922-3p   |
| ENSMUST00000197200   | miR-6971-3p   |
| ENSMUST00000197200   | miR-6964-3p   |

---

|                    |              |
|--------------------|--------------|
| ENSMUST00000197200 | miR-6999-3p  |
| ENSMUST00000197200 | miR-143-3p   |
| ENSMUST00000197200 | miR-6928-3p  |
| ENSMUST00000197200 | miR-124-3p   |
| ENSMUST00000197200 | miR-224-5p   |
| ENSMUST00000197200 | miR-3572-3p  |
| ENSMUST00000197200 | miR-1231-5p  |
| ENSMUST00000197200 | miR-150-5p   |
| ENSMUST00000197200 | miR-146b-3p  |
| ENSMUST00000197200 | miR-7237-3p  |
| ENSMUST00000197200 | miR-6920-5p  |
| ENSMUST00000197200 | miR-5107-3p  |
| ENSMUST00000197200 | miR-5106     |
| ENSMUST00000197200 | miR-7056-5p  |
| ENSMUST00000197200 | miR-7061-5p  |
| ENSMUST00000197200 | miR-6996-5p  |
| ENSMUST00000197200 | miR-6769b-5p |
| ENSMUST00000197200 | miR-7024-3p  |
| ENSMUST00000197200 | miR-3113-5p  |
| ENSMUST00000197200 | miR-5710     |
| ENSMUST00000197200 | miR-3079-5p  |
| ENSMUST00000197200 | miR-7649-3p  |
| ENSMUST00000197200 | miR-672-3p   |
| ENSMUST00000197200 | miR-3084-5p  |
| ENSMUST00000197200 | miR-3473f    |
| ENSMUST00000197200 | miR-7042-5p  |
| ENSMUST00000197200 | miR-1946a    |
| ENSMUST00000197200 | miR-7022-5p  |
| ENSMUST00000197200 | miR-8103     |
| ENSMUST00000197200 | miR-7087-5p  |
| ENSMUST00000197200 | miR-6998-5p  |
| ENSMUST00000197200 | miR-6947-5p  |
| ENSMUST00000197200 | miR-7066-3p  |
| ENSMUST00000197200 | miR-6516-3p  |
| ENSMUST00000197200 | miR-362-3p   |
| ENSMUST00000197200 | miR-6932-3p  |
| ENSMUST00000197200 | miR-6941-3p  |
| ENSMUST00000197200 | miR-6937-5p  |
| ENSMUST00000197200 | miR-3474     |
| ENSMUST00000197200 | miR-1934-5p  |
| ENSMUST00000197200 | miR-191-3p   |
| ENSMUST00000197200 | miR-5621-5p  |
| ENSMUST00000197200 | miR-7664-3p  |
| ENSMUST00000197200 | miR-1941-5p  |

---



---

|                    |               |
|--------------------|---------------|
| ENSMUST00000197200 | miR-6898-3p   |
| ENSMUST00000197200 | miR-7031-3p   |
| ENSMUST00000197200 | miR-25-3p     |
| ENSMUST00000197200 | miR-3100-5p   |
| ENSMUST00000197200 | miR-6985-5p   |
| ENSMUST00000197200 | miR-300-5p    |
| ENSMUST00000197200 | miR-103-1-5p  |
| ENSMUST00000197200 | miR-103-2-5p  |
| ENSMUST00000197200 | miR-136-5p    |
| ENSMUST00000197200 | miR-483-3p    |
| ENSMUST00000197200 | miR-7051-5p   |
| ENSMUST00000197200 | miR-205-5p    |
| ENSMUST00000125930 | miR-26a-2-3p  |
| ENSMUST00000125930 | miR-26b-3p    |
| ENSMUST00000125930 | miR-6964-3p   |
| ENSMUST00000125930 | miR-6935-3p   |
| ENSMUST00000182575 | miR-669c-3p   |
| ENSMUST00000182575 | miR-7649-3p   |
| ENSMUST00000182575 | miR-7073-5p   |
| ENSMUST00000182575 | miR-6925-5p   |
| ENSMUST00000182575 | miR-3473g     |
| ENSMUST00000182575 | miR-499-5p    |
| ENSMUST00000182575 | miR-323-5p    |
| ENSMUST00000182575 | miR-877-3p    |
| ENSMUST00000182575 | miR-448-3p    |
| ENSMUST00000182575 | miR-671-3p    |
| ENSMUST00000182575 | miR-1188-5p   |
| ENSMUST00000182575 | miR-3113-5p   |
| ENSMUST00000182575 | miR-6540-3p   |
| ENSMUST00000182575 | miR-6901-3p   |
| ENSMUST00000182575 | miR-7048-5p   |
| ENSMUST00000182575 | miR-185-3p    |
| ENSMUST00000182575 | let-7g-3p     |
| ENSMUST00000182575 | miR-3065-5p   |
| ENSMUST00000182575 | miR-181b-2-3p |
| ENSMUST00000182575 | miR-181b-1-3p |
| ENSMUST00000182575 | miR-7008-5p   |
| ENSMUST00000182575 | miR-3473e     |
| ENSMUST00000182575 | miR-3473b     |
| ENSMUST00000182575 | miR-6998-3p   |
| ENSMUST00000182575 | miR-25-5p     |
| ENSMUST00000182575 | miR-7017-5p   |
| ENSMUST00000119305 | miR-7054-3p   |
| ENSMUST00000119305 | miR-107-3p    |

---

---

|                    |              |
|--------------------|--------------|
| ENSMUST00000119305 | miR-30b-5p   |
| ENSMUST00000119305 | miR-3113-5p  |
| ENSMUST00000119305 | miR-7047-3p  |
| ENSMUST00000119305 | miR-30c-1-3p |
| ENSMUST00000119305 | miR-547-5p   |
| ENSMUST00000218432 | miR-486b-3p  |
| ENSMUST00000218432 | miR-486a-3p  |
| ENSMUST00000218432 | miR-6996-5p  |
| ENSMUST00000218432 | miR-1930-3p  |
| ENSMUST00000218432 | miR-143-5p   |
| ENSMUST00000218432 | miR-7688-5p  |
| ENSMUST00000138202 | miR-191-3p   |
| ENSMUST00000138202 | miR-466l-3p  |
| ENSMUST00000138202 | miR-34a-3p   |
| ENSMUST00000138202 | miR-7075-5p  |
| ENSMUST00000138202 | miR-216b-3p  |
| ENSMUST00000138202 | miR-24-3p    |
| ENSMUST00000138202 | miR-7032-3p  |
| ENSMUST00000138202 | miR-466o-5p  |
| ENSMUST00000138202 | miR-466b-5p  |
| ENSMUST00000138202 | miR-670-5p   |
| ENSMUST00000138202 | miR-31-3p    |
| ENSMUST00000138202 | miR-7019-3p  |
| ENSMUST00000138202 | miR-378a-5p  |
| ENSMUST00000138202 | miR-3074-5p  |
| ENSMUST00000138202 | miR-7021-3p  |
| ENSMUST00000138202 | miR-6481     |
| ENSMUST00000138202 | miR-8103     |
| ENSMUST00000138202 | miR-18a-3p   |
| ENSMUST00000138202 | miR-7047-5p  |
| ENSMUST00000138202 | miR-7679-5p  |
| ENSMUST00000138202 | miR-3058-5p  |
| ENSMUST00000138202 | miR-6950-3p  |
| ENSMUST00000182642 | miR-20b-3p   |
| ENSMUST00000182642 | miR-17-3p    |
| ENSMUST00000182642 | miR-296-5p   |
| ENSMUST00000182642 | miR-5621-5p  |
| ENSMUST00000182642 | miR-103-2-5p |
| ENSMUST00000182642 | miR-103-1-5p |
| ENSMUST00000182642 | miR-351-3p   |
| ENSMUST00000182642 | miR-7674-5p  |
| ENSMUST00000182642 | miR-324-3p   |
| ENSMUST00000182642 | miR-378d     |
| ENSMUST00000182642 | miR-7021-3p  |

---

---

|                    |             |
|--------------------|-------------|
| ENSMUST00000182642 | miR-7659-5p |
| ENSMUST00000182642 | miR-666-3p  |
| ENSMUST00000182642 | miR-6540-3p |
| ENSMUST00000182642 | miR-466f-3p |
| ENSMUST00000182642 | miR-7004-5p |
| ENSMUST00000182642 | miR-669c-3p |
| ENSMUST00000182642 | miR-6909-5p |
| ENSMUST00000162088 | miR-669c-3p |
| ENSMUST00000162088 | miR-7021-3p |
| ENSMUST00000162088 | miR-744-3p  |
| ENSMUST00000162088 | miR-7679-5p |
| ENSMUST00000162088 | miR-216a-5p |
| ENSMUST00000162088 | miR-6419    |
| ENSMUST00000162088 | miR-195b    |
| ENSMUST00000162088 | miR-195a-5p |
| ENSMUST00000162088 | miR-16-5p   |
| ENSMUST00000162088 | miR-15a-5p  |
| ENSMUST00000162088 | miR-324-5p  |
| ENSMUST00000162088 | miR-497a-5p |
| ENSMUST00000162088 | miR-6984-3p |
| ENSMUST00000162088 | miR-1961    |
| ENSMUST00000162088 | miR-127-5p  |
| ENSMUST00000162088 | miR-3964    |
| ENSMUST00000203561 | miR-503-5p  |
| ENSMUST00000203561 | miR-6921-3p |
| ENSMUST00000203561 | miR-148a-5p |
| ENSMUST00000203561 | miR-21b     |
| ENSMUST00000203561 | miR-26b-5p  |
| ENSMUST00000203561 | miR-669c-3p |
| ENSMUST00000203561 | miR-126a-5p |
| ENSMUST00000203561 | miR-8118    |
| ENSMUST00000203561 | miR-672-3p  |
| ENSMUST00000203561 | miR-7010-5p |
| ENSMUST00000203561 | miR-7048-3p |
| ENSMUST00000203561 | miR-3471    |
| ENSMUST00000203561 | miR-1954    |
| ENSMUST00000203561 | miR-5616-5p |
| ENSMUST00000203561 | miR-298-5p  |
| ENSMUST00000203561 | miR-6997-5p |
| ENSMUST00000203561 | miR-15a-5p  |
| ENSMUST00000126582 | miR-8103    |
| ENSMUST00000126344 | miR-7017-5p |
| ENSMUST00000126344 | miR-7032-3p |
| ENSMUST00000126344 | miR-7008-3p |

---

---

|                    |             |
|--------------------|-------------|
| ENSMUST00000126344 | miR-743a-3p |
| ENSMUST00000126344 | miR-5616-5p |
| ENSMUST00000126344 | miR-146a-5p |
| ENSMUST00000126344 | miR-5107-3p |
| ENSMUST00000126344 | miR-3110-5p |
| ENSMUST00000126344 | miR-6925-5p |
| ENSMUST00000126344 | miR-34a-3p  |
| ENSMUST00000168634 | miR-188-3p  |
| ENSMUST00000168634 | miR-7022-5p |
| ENSMUST00000168634 | miR-3474    |
| ENSMUST00000168634 | miR-7008-3p |
| ENSMUST00000151020 | miR-302c-3p |
| ENSMUST00000151020 | miR-204-3p  |
| ENSMUST00000151020 | miR-5101    |
| ENSMUST00000151020 | miR-149-5p  |
| ENSMUST00000151020 | miR-1264-5p |
| ENSMUST00000151020 | miR-296-5p  |
| ENSMUST00000151020 | miR-4661-3p |
| ENSMUST00000151020 | miR-326-3p  |
| ENSMUST00000151020 | miR-490-5p  |
| ENSMUST00000151020 | miR-199b-5p |
| ENSMUST00000151020 | miR-199a-5p |
| ENSMUST00000151020 | miR-3106-5p |
| ENSMUST00000151020 | miR-27a-3p  |
| ENSMUST00000151020 | miR-7056-5p |
| ENSMUST00000151020 | miR-669e-3p |
| ENSMUST00000151020 | miR-339-5p  |
| ENSMUST00000151020 | miR-497a-3p |
| ENSMUST00000151020 | miR-375-3p  |
| ENSMUST00000151020 | miR-7022-5p |
| ENSMUST00000151020 | miR-6967-5p |
| ENSMUST00000151020 | miR-7037-3p |
| ENSMUST00000151020 | miR-7649-3p |
| ENSMUST00000151020 | miR-130a-5p |
| ENSMUST00000151020 | miR-6392-5p |
| ENSMUST00000151020 | miR-7025-3p |
| ENSMUST00000134954 | miR-6985-5p |
| ENSMUST00000134954 | miR-5624-3p |
| ENSMUST00000134954 | miR-669c-3p |
| ENSMUST00000134954 | miR-669e-3p |
| ENSMUST00000134954 | miR-214-3p  |
| ENSMUST00000218286 | miR-195b    |
| ENSMUST00000218286 | miR-195a-5p |
| ENSMUST00000218286 | miR-16-5p   |

---

---

|                    |             |
|--------------------|-------------|
| ENSMUST00000218286 | miR-15a-5p  |
| ENSMUST00000218286 | miR-3474    |
| ENSMUST00000218286 | miR-6419    |
| ENSMUST00000218286 | miR-497a-5p |
| ENSMUST00000218286 | miR-24-3p   |
| ENSMUST00000218286 | miR-700-5p  |
| ENSMUST00000218286 | miR-107-3p  |
| ENSMUST00000218286 | miR-6910-3p |
| ENSMUST00000218286 | miR-490-5p  |
| ENSMUST00000185523 | miR-1954    |
| ENSMUST00000185523 | miR-3101-3p |
| ENSMUST00000185523 | miR-3966    |
| ENSMUST00000185523 | miR-3095-5p |
| ENSMUST00000131037 | miR-3075-5p |
| ENSMUST00000131037 | miR-3552    |
| ENSMUST00000131037 | miR-449a-5p |
| ENSMUST00000131037 | miR-34a-5p  |
| ENSMUST00000131037 | miR-7656-3p |
| ENSMUST00000131037 | miR-449c-5p |
| ENSMUST00000131037 | miR-449b    |
| ENSMUST00000131037 | miR-34c-5p  |
| ENSMUST00000131037 | miR-34b-5p  |
| ENSMUST00000131037 | miR-7213-5p |
| ENSMUST00000131037 | miR-7679-5p |
| ENSMUST00000131037 | miR-149-5p  |
| ENSMUST00000131037 | miR-3473e   |
| ENSMUST00000131037 | miR-3473b   |
| ENSMUST00000131037 | miR-652-3p  |
| ENSMUST00000131037 | miR-666-3p  |
| ENSMUST00000173081 | miR-1231-5p |
| ENSMUST00000173081 | miR-6903-3p |
| ENSMUST00000173081 | miR-205-5p  |
| ENSMUST00000173081 | miR-125a-3p |
| ENSMUST00000173081 | miR-743a-3p |
| ENSMUST00000173081 | miR-6982-3p |
| ENSMUST00000173081 | miR-6950-3p |
| ENSMUST00000173081 | miR-3113-5p |
| ENSMUST00000173081 | miR-500-5p  |
| ENSMUST00000173081 | miR-6935-3p |
| ENSMUST00000173081 | miR-466i-5p |
| ENSMUST00000173081 | miR-466d-5p |
| ENSMUST00000173081 | miR-20b-3p  |
| ENSMUST00000173081 | miR-17-3p   |
| ENSMUST00000173081 | miR-5621-5p |

---

---

|                    |               |
|--------------------|---------------|
| ENSMUST00000173081 | miR-6984-3p   |
| ENSMUST00000199803 | miR-8118      |
| ENSMUST00000199803 | miR-6925-5p   |
| ENSMUST00000199803 | miR-448-3p    |
| ENSMUST00000199803 | miR-33-5p     |
| ENSMUST00000199803 | let-7b-3p     |
| ENSMUST00000199803 | miR-6985-3p   |
| ENSMUST00000199803 | miR-7034-3p   |
| ENSMUST00000199803 | miR-6944-5p   |
| ENSMUST00000199803 | miR-211-5p    |
| ENSMUST00000199803 | miR-204-5p    |
| ENSMUST00000199803 | miR-152-3p    |
| ENSMUST00000199803 | miR-1960      |
| ENSMUST00000199803 | miR-466i-3p   |
| ENSMUST00000199803 | miR-466l-3p   |
| ENSMUST00000199803 | miR-188-5p    |
| ENSMUST00000199803 | miR-669f-3p   |
| ENSMUST00000199803 | miR-669b-3p   |
| ENSMUST00000199803 | miR-467a-3p   |
| ENSMUST00000199803 | miR-6910-3p   |
| ENSMUST00000199803 | miR-322-3p    |
| ENSMUST00000199803 | miR-7051-5p   |
| ENSMUST00000199803 | miR-669c-3p   |
| ENSMUST00000199803 | miR-8097      |
| ENSMUST00000199803 | miR-487b-3p   |
| ENSMUST00000220428 | miR-3966      |
| ENSMUST00000220428 | miR-6922-3p   |
| MSTRG.2483.2       | miR-7037-3p   |
| MSTRG.2483.2       | miR-7213-5p   |
| MSTRG.2483.2       | miR-486b-3p   |
| MSTRG.2483.2       | miR-486a-3p   |
| MSTRG.2483.2       | miR-326-3p    |
| MSTRG.2483.2       | miR-22-3p     |
| MSTRG.2483.2       | miR-7674-5p   |
| MSTRG.2483.2       | miR-3110-5p   |
| MSTRG.2483.2       | miR-7021-3p   |
| MSTRG.2483.2       | miR-149-5p    |
| MSTRG.2483.2       | miR-7008-5p   |
| MSTRG.2483.2       | miR-24-3p     |
| MSTRG.2483.2       | miR-7062-5p   |
| MSTRG.2483.2       | miR-135a-1-3p |
| MSTRG.2483.2       | miR-7009-3p   |
| MSTRG.2483.2       | miR-324-5p    |
| MSTRG.2483.2       | miR-18a-5p    |

---

---

|               |                  |
|---------------|------------------|
| MSTRG.2483.2  | miR-143-3p       |
| MSTRG.2483.2  | miR-669c-3p      |
| MSTRG.2483.2  | miR-1949         |
| MSTRG.2483.2  | miR-764-3p       |
| MSTRG.2483.2  | miR-7075-5p      |
| MSTRG.2483.2  | miR-344c-5p      |
| MSTRG.2483.2  | miR-211-5p       |
| MSTRG.2483.2  | miR-204-5p       |
| MSTRG.2483.2  | miR-3102-3p.2-3p |
| MSTRG.2483.2  | miR-6973b-3p     |
| MSTRG.2483.2  | miR-138-2-3p     |
| MSTRG.2483.2  | miR-1258-3p      |
| MSTRG.2483.2  | miR-6985-3p      |
| MSTRG.2483.2  | miR-878-5p       |
| MSTRG.2483.2  | miR-7649-3p      |
| MSTRG.2483.2  | miR-3470a        |
| MSTRG.2483.2  | miR-214-3p       |
| MSTRG.2483.2  | miR-483-3p       |
| MSTRG.2483.2  | miR-6715-5p      |
| MSTRG.2483.2  | miR-3095-5p      |
| MSTRG.2483.2  | miR-6997-5p      |
| MSTRG.2483.2  | miR-8097         |
| MSTRG.2483.2  | miR-7024-3p      |
| MSTRG.2483.2  | miR-3470b        |
| MSTRG.2483.2  | miR-665-3p       |
| MSTRG.2483.2  | miR-452-3p       |
| MSTRG.2483.2  | miR-27a-3p       |
| MSTRG.2483.2  | miR-3093-5p      |
| MSTRG.2483.2  | miR-136-5p       |
| MSTRG.2483.2  | miR-878-3p       |
| MSTRG.2483.2  | miR-670-3p       |
| MSTRG.2483.2  | miR-5125         |
| MSTRG.2483.2  | miR-378a-5p      |
| MSTRG.2483.2  | miR-6943-5p      |
| MSTRG.2483.2  | miR-6925-5p      |
| MSTRG.2483.2  | miR-1224-3p      |
| MSTRG.2483.2  | miR-3078-3p      |
| MSTRG.2483.2  | miR-20b-3p       |
| MSTRG.2483.2  | miR-17-3p        |
| MSTRG.2483.2  | miR-193b-5p      |
| MSTRG.16159.9 | miR-7019-3p      |
| MSTRG.16159.9 | miR-3552         |
| MSTRG.16159.9 | miR-7236-5p      |
| MSTRG.16159.9 | miR-6998-3p      |

---

---

|               |              |
|---------------|--------------|
| MSTRG.17585.1 | miR-466i-5p  |
| MSTRG.17585.1 | miR-466d-5p  |
| MSTRG.17585.1 | miR-126a-5p  |
| MSTRG.17585.1 | miR-200b-5p  |
| MSTRG.17585.1 | miR-6903-3p  |
| MSTRG.17585.1 | miR-200a-5p  |
| MSTRG.17585.1 | miR-181d-5p  |
| MSTRG.17585.1 | miR-181c-5p  |
| MSTRG.17585.1 | miR-181a-5p  |
| MSTRG.17585.1 | miR-6928-5p  |
| MSTRG.17585.1 | miR-203-3p   |
| MSTRG.17585.1 | miR-200c-5p  |
| MSTRG.17585.1 | miR-743a-3p  |
| MSTRG.17585.1 | miR-19b-1-5p |
| MSTRG.17585.1 | miR-7087-5p  |
| MSTRG.17585.1 | miR-466h-5p  |
| MSTRG.17585.1 | miR-6967-5p  |
| MSTRG.17585.1 | miR-3082-5p  |
| MSTRG.17585.1 | miR-7656-3p  |
| MSTRG.17585.1 | miR-7057-3p  |
| MSTRG.17585.1 | miR-709      |
| MSTRG.17585.1 | miR-3108-5p  |
| MSTRG.17585.1 | miR-669m-5p  |
| MSTRG.17585.1 | miR-466m-5p  |
| MSTRG.17585.1 | miR-466j     |
| MSTRG.17585.1 | miR-7073-5p  |
| MSTRG.17585.1 | miR-421-5p   |
| MSTRG.17585.1 | miR-466n-5p  |
| MSTRG.17585.1 | miR-5101     |
| MSTRG.17585.1 | miR-146b-3p  |
| MSTRG.17585.1 | miR-465c-5p  |
| MSTRG.17585.1 | miR-465b-5p  |
| MSTRG.17585.1 | miR-155-5p   |
| MSTRG.17585.1 | miR-299b-3p  |
| MSTRG.17585.1 | miR-299a-3p  |
| MSTRG.17585.1 | miR-3472     |
| MSTRG.17585.1 | miR-6959-5p  |
| MSTRG.17585.1 | miR-466q     |
| MSTRG.17585.1 | miR-7024-5p  |
| MSTRG.17585.1 | miR-466p-5p  |
| MSTRG.17585.1 | miR-466a-5p  |
| MSTRG.17585.1 | miR-6926-5p  |
| MSTRG.17585.1 | miR-466e-5p  |
| MSTRG.17585.1 | miR-3474     |

---



---

|               |              |
|---------------|--------------|
| MSTRG.17585.1 | miR-3079-3p  |
| MSTRG.17585.1 | miR-194-2-3p |
| MSTRG.17585.1 | miR-3100-5p  |
| MSTRG.17585.1 | miR-7008-3p  |
| MSTRG.17585.1 | miR-7009-3p  |
| MSTRG.17585.1 | miR-3065-5p  |
| MSTRG.17585.1 | miR-669c-3p  |
| MSTRG.17585.1 | miR-5624-3p  |
| MSTRG.17585.1 | miR-6516-3p  |
| MSTRG.17585.1 | miR-376c-3p  |
| MSTRG.17585.1 | miR-6941-5p  |
| MSTRG.17585.1 | miR-1187     |
| MSTRG.17585.1 | miR-3099-5p  |
| MSTRG.17585.1 | miR-669e-3p  |
| MSTRG.17585.1 | miR-542-3p   |
| MSTRG.17585.1 | miR-3552     |
| MSTRG.17585.1 | miR-669b-5p  |
| MSTRG.17585.1 | miR-3964     |
| MSTRG.17585.1 | miR-127-5p   |
| MSTRG.17585.1 | miR-136-5p   |
| MSTRG.17585.1 | miR-7025-3p  |
| MSTRG.9309.1  | miR-7236-5p  |
| MSTRG.9309.1  | miR-5101     |
| MSTRG.9309.1  | miR-669c-3p  |
| MSTRG.9309.1  | miR-467e-5p  |
| MSTRG.9309.1  | miR-669b-5p  |
| MSTRG.9309.1  | miR-669f-5p  |
| MSTRG.9309.1  | miR-7042-5p  |
| MSTRG.9309.1  | miR-709      |
| MSTRG.9309.1  | miR-1231-5p  |
| MSTRG.9309.1  | miR-3569-3p  |
| MSTRG.9309.1  | miR-669m-3p  |
| MSTRG.9309.1  | miR-669l-3p  |
| MSTRG.9309.1  | miR-467e-3p  |
| MSTRG.9309.1  | miR-467d-3p  |
| MSTRG.9309.1  | miR-467c-3p  |
| MSTRG.9309.1  | miR-467b-3p  |
| MSTRG.9309.1  | miR-6925-5p  |
| MSTRG.9309.1  | miR-376c-3p  |
| MSTRG.9309.1  | miR-7021-3p  |
| MSTRG.9309.1  | miR-216c-5p  |
| MSTRG.9309.1  | miR-3108-5p  |
| MSTRG.9309.1  | miR-350-3p   |
| MSTRG.9309.1  | miR-218-2-3p |

---

---

|               |             |
|---------------|-------------|
| MSTRG.9309.1  | miR-7010-5p |
| MSTRG.9309.1  | miR-6540-3p |
| MSTRG.9309.1  | miR-6967-5p |
| MSTRG.9309.1  | miR-669f-3p |
| MSTRG.9309.1  | miR-669b-3p |
| MSTRG.9309.1  | miR-467a-3p |
| MSTRG.9309.1  | miR-135b-5p |
| MSTRG.9309.1  | miR-6922-3p |
| MSTRG.9309.1  | miR-22-5p   |
| MSTRG.9309.1  | miR-101b-3p |
| MSTRG.9309.1  | miR-6937-5p |
| MSTRG.9309.1  | miR-181d-5p |
| MSTRG.9309.1  | miR-181c-5p |
| MSTRG.9309.1  | miR-181a-5p |
| MSTRG.9309.1  | miR-466f-3p |
| MSTRG.9309.1  | miR-297c-3p |
| MSTRG.9309.1  | miR-297b-3p |
| MSTRG.9309.1  | miR-297a-3p |
| MSTRG.9309.1  | miR-337-3p  |
| MSTRG.9309.1  | miR-22-3p   |
| MSTRG.9309.1  | miR-153-5p  |
| MSTRG.9309.1  | miR-30b-5p  |
| MSTRG.9309.1  | miR-3105-3p |
| MSTRG.9309.1  | miR-3110-5p |
| MSTRG.9309.1  | miR-466l-3p |
| MSTRG.9309.1  | miR-452-3p  |
| MSTRG.9309.1  | miR-211-5p  |
| MSTRG.9309.1  | miR-204-5p  |
| MSTRG.9309.1  | miR-93-3p   |
| MSTRG.15980.1 | miR-466i-5p |
| MSTRG.15980.1 | miR-466d-5p |
| MSTRG.15980.1 | miR-6903-3p |
| MSTRG.15980.1 | miR-669i    |
| MSTRG.15980.1 | miR-7061-5p |
| MSTRG.15980.1 | miR-448-3p  |
| MSTRG.15980.1 | miR-7008-5p |
| MSTRG.15980.1 | miR-6967-5p |
| MSTRG.15980.1 | miR-3106-5p |
| MSTRG.15980.1 | miR-471-3p  |
| MSTRG.15980.1 | miR-6998-3p |
| MSTRG.15980.1 | miR-6985-5p |
| MSTRG.15980.1 | miR-6950-3p |
| MSTRG.15980.1 | miR-7008-3p |
| MSTRG.15980.1 | miR-6540-3p |

---

---

|                |             |
|----------------|-------------|
| MSTRG.15980.1  | miR-466l-3p |
| MSTRG.15980.1  | miR-302a-5p |
| MSTRG.15980.1  | miR-7047-5p |
| MSTRG.15980.1  | miR-3079-3p |
| MSTRG.15980.1  | miR-3074-5p |
| MSTRG.15980.1  | miR-218-5p  |
| MSTRG.15980.1  | miR-5616-5p |
| MSTRG.15980.1  | miR-455-3p  |
| MSTRG.15980.1  | miR-500-5p  |
| MSTRG.15980.1  | miR-466p-5p |
| MSTRG.15980.1  | miR-466a-5p |
| MSTRG.15980.1  | miR-1187    |
| MSTRG.18159.11 | miR-669c-3p |
| MSTRG.18159.11 | miR-490-5p  |
| MSTRG.18159.11 | miR-452-5p  |
| MSTRG.18159.11 | miR-429-3p  |
| MSTRG.18159.11 | miR-200c-3p |
| MSTRG.18159.11 | miR-200b-3p |
| MSTRG.18159.11 | miR-188-5p  |
| MSTRG.18159.11 | miR-22-5p   |
| MSTRG.18159.11 | miR-466i-5p |
| MSTRG.18159.11 | miR-466d-5p |
| MSTRG.18159.11 | miR-466f-3p |
| MSTRG.18159.11 | miR-6980-3p |
| MSTRG.18159.11 | miR-101b-3p |
| MSTRG.18159.11 | miR-3084-5p |
| MSTRG.18159.11 | miR-6999-3p |
| MSTRG.18159.11 | miR-7057-3p |
| MSTRG.18159.11 | miR-672-5p  |
| MSTRG.18159.11 | miR-6984-3p |
| MSTRG.18159.11 | miR-669e-3p |
| MSTRG.18159.11 | miR-34c-3p  |
| MSTRG.18159.11 | miR-34b-3p  |
| MSTRG.18159.11 | miR-466l-3p |
| MSTRG.18159.11 | miR-6983-3p |
| MSTRG.18159.11 | miR-452-3p  |
| MSTRG.18159.11 | miR-3963    |
| MSTRG.18159.11 | miR-124-3p  |
| MSTRG.18159.11 | miR-7022-5p |
| MSTRG.18159.11 | miR-7051-5p |
| MSTRG.18159.11 | miR-7224-3p |
| MSTRG.18159.11 | miR-33-3p   |
| MSTRG.18159.11 | miR-374c-5p |
| MSTRG.18159.11 | miR-669h-3p |

---

---

|                |               |
|----------------|---------------|
| MSTRG.18159.11 | miR-362-3p    |
| MSTRG.18159.11 | miR-7024-5p   |
| MSTRG.18159.11 | miR-7048-3p   |
| MSTRG.18159.11 | miR-669i      |
| MSTRG.18159.11 | miR-466i-3p   |
| MSTRG.18159.11 | miR-145a-3p   |
| MSTRG.18159.11 | miR-450b-3p   |
| MSTRG.18159.11 | miR-450a-1-3p |
| MSTRG.18159.11 | miR-8097      |
| MSTRG.18159.11 | miR-96-5p     |
| MSTRG.18159.11 | miR-208b-3p   |
| MSTRG.18159.11 | miR-208a-3p   |
| MSTRG.18159.11 | miR-8106      |
| MSTRG.18159.11 | miR-6941-5p   |

---

**Table S8.** Correlated information of the upregulated lncRNA-associated ceRNA network in the hippocampus of 5×FAD mice.

| Upregulated lncRNA | Downregulated miRNA                                                                                                                                                                                                                                               | Upregulated mRNA                                                                                                                                                                                                                     |
|--------------------|-------------------------------------------------------------------------------------------------------------------------------------------------------------------------------------------------------------------------------------------------------------------|--------------------------------------------------------------------------------------------------------------------------------------------------------------------------------------------------------------------------------------|
| ENSMUST00000180635 | miR-3085-3p, miR-3064-5p,<br>miR-344g-5p, miR-3069-5p                                                                                                                                                                                                             | Wdfy1, Tmed1, Mgl1, Fbln2,<br>Cntn2, Abca3, Ash11, Col1a2,<br>Tmem55b, Pacsin3, Celf2,<br>Cobll1, Fmn12                                                                                                                              |
| ENSMUST00000127786 | miR-3085-3p, miR-3064-5p,<br>miR-673-5p, miR-344g-5p,<br>miR-329-3p, miR-466o-3p,<br>miR-466m-3p, miR-186-5p,<br>miR-3069-5p, miR-338-3p,<br>miR-7b-5p, miR-694, miR-466a-3p,<br>miR-466d-3p, miR-466e-3p,<br>miR-467g, miR-466p-3p,<br>miR-466b-3p, miR-466c-3p, | Wdfy1, Tmed1, Mgl1, Fbln2,<br>Cntn2, Abca3, Ash11, Eps8,<br>Islr2, Celf2, Fbx117, Col1a2,<br>Tmem55b, Pacsin3, Cobll1,<br>Lzts3, Pak6, Tmod3, Clec7a,<br>Fmn12, Stard3nl, Aplp2,<br>Auts2, Nr3c2, Gng7, Spry1                        |
| ENSMUST00000028291 | miR-3085-3p, miR-3064-5p,<br>miR-466k                                                                                                                                                                                                                             | Wdfy1, Tmed1, Mgl1, Fbln2,<br>Cntn2, Abca3, Ash11, Foxp1,<br>Nde1, Clec7a, Fbx117                                                                                                                                                    |
| ENSMUST00000150127 | miR-3085-3p, miR-3064-5p                                                                                                                                                                                                                                          | Wdfy1, Tmed1, Mgl1, Fbln2,<br>Cntn2, Abca3, Ash11                                                                                                                                                                                    |
| MSTRG.17500.2      | miR-3085-3p, miR-3064-5p,<br>miR-673-5p, miR-706, miR-466k,<br>miR-344g-5p, miR-329-3p,<br>miR-466o-3p, miR-466m-3p,<br>miR-186-5p, miR-694,<br>miR-466a-3p, miR-466d-3p,<br>miR-466e-3p, miR-467g,<br>miR-466p-3p, miR-466b-3p,<br>miR-466c-3p                   | Wdfy1, Tmed1, Mgl1, Fbln2,<br>Cntn2, Abca3, Ash11, Eps8,<br>Islr2, Celf2, Fbx117, Elovl2,<br>Parp11, Col1a2, Auts2,<br>Akap11, Foxp1, Nde1,<br>Clec7a, Tmem55b, Pacsin3,<br>Cobll1, Lzts3, Pak6, Tmod3,<br>Fmn12, Nr3c2, Gng7, Spry1 |
| ENSMUST00000197854 | miR-673-5p, miR-7b-5p                                                                                                                                                                                                                                             | Eps8, Islr2, Celf2, Fbx117,<br>Aplp2, Ash11                                                                                                                                                                                          |
| MSTRG.17055.1      | miR-673-5p, miR-706,<br>miR-466o-3p, miR-466m-3p,<br>miR-338-3p, miR-466p-3p,<br>miR-466b-3p, miR-466c-3p                                                                                                                                                         | Eps8, Islr2, Celf2, Fbx117,<br>Elovl2, Parp11, Col1a2,<br>Abca3, Auts2, Akap11, Lzts3,<br>Cntn2, Clec7a, Stard3nl                                                                                                                    |
| MSTRG.1243.32      | miR-673-5p, miR-706, miR-329-3p,<br>miR-466o-3p, miR-466m-3p,<br>miR-186-5p, miR-338-3p,<br>miR-7b-5p, miR-466a-3p,<br>miR-466d-3p, miR-466e-3p,<br>miR-467g, miR-466p-3p,<br>miR-466b-3p, miR-466c-3p                                                            | Eps8, Islr2, Celf2, Fbx117,<br>Elovl2, Parp11, Col1a2,<br>Abca3, Auts2, Akap11, Lzts3,<br>Pak6, Tmod3, Clec7a, Fmn12,<br>Cntn2, Stard3nl, Aplp2,<br>Ash11, Spry1                                                                     |

|                    |                                                                                                                                                                                                                        |                                                                                                                                                    |
|--------------------|------------------------------------------------------------------------------------------------------------------------------------------------------------------------------------------------------------------------|----------------------------------------------------------------------------------------------------------------------------------------------------|
| MSTRG.10674.1      | miR-706, miR-466k, miR-329-3p,<br>miR-466o-3p, miR-466m-3p,<br>miR-7b-5p, miR-466p-3p,<br>miR-466b-3p, miR-466c-3p                                                                                                     | Elovl2, Parp11, Col1a2,<br>Abca3, Aut2, Celf2, Akap11,<br>Foxp1, Nde1, Mgl1, Clec7a,<br>Fbx117, Lzts3, Pak6, Tmod3,<br>Aplp2, Ash11                |
| MSTRG.16327.2      | miR-466k                                                                                                                                                                                                               | Foxp1, Nde1, Mgl1, Clec7a,<br>Fbx117                                                                                                               |
| MSTRG.6775.12      | miR-466k, miR-344g-5p,<br>miR-329-3p, miR-466o-3p,<br>miR-466m-3p, miR-186-5p,<br>miR-3069-5p, miR-338-3p,<br>miR-694, miR-466a-3p,<br>miR-466d-3p, miR-466e-3p,<br>miR-467g, miR-466p-3p,<br>miR-466b-3p, miR-466c-3p | Foxp1, Nde1, Mgl1, Clec7a,<br>Fbx117, Col1a2, Tmem55b,<br>Pacs1n3, Celf2, Cob111, Lzts3,<br>Pak6, Tmod3, Fmnl2, Cntn2,<br>Aut2, Nr3c2, Gng7, Spry1 |
| MSTRG.6530.1       | miR-186-5p, miR-338-3p                                                                                                                                                                                                 | Fmnl2, Cntn2, Clec7a,<br>Stard3nl                                                                                                                  |
| ENSMUST00000152985 | miR-3069-5p                                                                                                                                                                                                            | Fmnl2, Cntn2                                                                                                                                       |
| ENSMUST00000153923 | miR-694                                                                                                                                                                                                                | Aut2, Nr3c2, Gng7                                                                                                                                  |

**Table S9.** Correlated information of the downregulated lncRNA-associated ceRNA network in the hippocampus of 5×FAD mice.

| Downregulated lncRNA | Upregulated miRNA                                                                                                        | Downregulated mRNA                                                                                                                                                                                             |
|----------------------|--------------------------------------------------------------------------------------------------------------------------|----------------------------------------------------------------------------------------------------------------------------------------------------------------------------------------------------------------|
| MSTRG.2483.2         | miR-452-3p, miR-136-5p,<br>miR-3110-5p, miR-24-3p,<br>miR-149-5p                                                         | Stxbp5l, Dnajc6, Inpp5e, Pik3ip1,<br>4932438A13Rik, Mapk10, Slc35c2,<br>Cd99l2, Bcorl1, Adarb1, Ddx3y,<br>Rab43, Rragc, Ctnnd1, Ric3, Fnbp1,<br>Ube2i                                                          |
| MSTRG.9309.1         | miR-452-3p, miR-5101,<br>miR-669b-5p, miR-466l-3p,<br>miR-466f-3p, miR-3110-5p                                           | Stxbp5l, Dnajc6, Inpp5e, Pik3ip1,<br>5730455P16Rik, Ilf3, Srrm4,<br>Mapk10, Ctnnd1, Dusp3, Tlk2, Znrfl,<br>Slitrk2, D130043K22Rik, Uggt1,<br>Wdr35, Pcbp2, Ociad2, Lzts3,<br>Lsm14a, Ppargc1a, Adarb1, Ddx3y   |
| MSTRG.18159.11       | miR-452-3p, miR-466d-5p,<br>miR-466i-5p, miR-466l-3p,<br>miR-466f-3p, miR-490-5p                                         | Stxbp5l, Dnajc6, Inpp5e, Pik3ip1,<br>Smarca2, Reps2, Slc25a22, Ctdsp2,<br>Fsd1l, Znrfl, Srrm4, Slitrk2,<br>D130043K22Rik, Uggt1, Wdr35,<br>Pcbp2, Ociad2, Lzts3, Lsm14a,<br>Ppargc1a, Aak1, Abat, Fnbp1, Ube2i |
| ENSMUST00000173081   | miR-466d-5p, miR-466i-5p,<br>miR-743a-3p, miR-3113-5p                                                                    | Stxbp5l, Smarca2, Reps2, Slc25a22,<br>Ctdsp2, Fsd1l, Srrm4                                                                                                                                                     |
| MSTRG.17585.1        | miR-466d-5p, miR-466i-5p,<br>miR-3065-5p, miR-5101,<br>miR-669b-5p, miR-3079-3p,<br>miR-136-5p, miR-3474,<br>miR-743a-3p | Stxbp5l, Smarca2, Reps2, Slc25a22,<br>Ctdsp2, Fsd1l, Srrm4,<br>5730455P16Rik, Ilf3, Mapk10,<br>Ctnnd1, Dusp3, Tlk2, Alg9, Rab43,<br>Aak1, Abat, Inpp5e, Cd99l2, Fnbp1,<br>Sez6l2                               |
| MSTRG.15980.1        | miR-466d-5p, miR-466i-5p,<br>miR-3079-3p, miR-466l-3p                                                                    | Stxbp5l, Smarca2, Reps2, Slc25a22,<br>Ctdsp2, Fsd1l, Ilf3, Srrm4, Znrfl,<br>Slitrk2, D130043K22Rik, Uggt1,<br>Wdr35, Pcbp2, Inpp5e                                                                             |
| ENSMUST00000184170   | miR-3065-5p, miR-669b-5p,<br>miR-3079-3p, miR-15a-5p,<br>miR-743a-3p, miR-24-3p                                          | Stxbp5l, Srrm4, 5730455P16Rik, Ilf3,<br>Uba1, Lzts3, Slc25a22, Ctdsp2, Gnas,<br>Pitpna, Fnbp1, Rab43, Rragc                                                                                                    |
| ENSMUST00000182575   | miR-3065-5p, miR-3113-5p                                                                                                 | Stxbp5l, Srrm4, Fsd1l<br>5730455P16Rik, Ilf3, Srrm4,                                                                                                                                                           |
| ENSMUST00000197200   | miR-5101, miR-669b-5p,<br>miR-136-5p, miR-3474,<br>miR-3113-5p                                                           | Mapk10, Ctnnd1, Dusp3, Tlk2,<br>4932438A13Rik, Slc35c2, Cd99l2,<br>Bcorl1, Alg9, Rab43, Reps2, Aak1,<br>Abat, Inpp5e, Fnbp1, Sez6l2, Fsd1l                                                                     |

|                    |                                                  |                                                                                                                                                                        |
|--------------------|--------------------------------------------------|------------------------------------------------------------------------------------------------------------------------------------------------------------------------|
| ENSMUST00000151020 | miR-5101, miR-466l-3p,<br>miR-149-5p, miR-490-5p | 5730455P16Rik, Ilf3, Srrm4,<br>Mapk10, Ctnnd1, Dusp3, Tlk2, Znrfl,<br>Slitrk2, D130043K22Rik, Uggt1,<br>Wdr35, Pcbp2, Inpp5e, Ric3, Rragc,<br>Fnbp1, Ube2i, Aak1, Abat |
| ENSMUST00000162088 | miR-15a-5p                                       | Uba1, Lzts3, Slc25a22, Ctdsp2, Gnas,<br>Pitpna, Fnbp1                                                                                                                  |
| ENSMUST00000203561 | miR-15a-5p                                       | Uba1, Lzts3, Slc25a22, Ctdsp2, Gnas,<br>Pitpna, Fnbp1                                                                                                                  |
| ENSMUST00000218286 | miR-15a-5p, miR-3474,<br>miR-24-3p, miR-490-5p   | Uba1, Lzts3, Slc25a22, Ctdsp2, Gnas,<br>Pitpna, Fnbp1, Alg9, Rab43, Repts2,<br>Aak1, Abat, Inpp5e, Cd99l2, Sez6l2,<br>Rragc, Uggt1, Pcbp2, Ube2i                       |
| ENSMUST00000138202 | miR-466l-3p, miR-24-3p                           | Znrfl, Srrm4, Slitrk2,<br>D130043K22Rik, Uggt1, Wdr35,<br>Pcbp2, Inpp5e, Rab43, Rragc                                                                                  |
| ENSMUST00000199803 | miR-466l-3p                                      | Znrfl, Srrm4, Slitrk2,<br>D130043K22Rik, Uggt1, Wdr35,<br>Pcbp2, Inpp5e                                                                                                |
| ENSMUST00000182642 | miR-466f-3p                                      | Znrfl, Ociad2, Lzts3, Lsm14a,<br>Ppargc1a                                                                                                                              |
| ENSMUST00000126344 | miR-3110-5p, miR-743a-3p                         | Adarb1, Ddx3y, Srrm4                                                                                                                                                   |
| ENSMUST00000168634 | miR-3474                                         | Alg9, Rab43, Repts2, Aak1, Abat,<br>Inpp5e, Cd99l2, Fnbp1, Sez6l2                                                                                                      |
| ENSMUST00000131037 | miR-149-5p                                       | Ctnnd1, Ric3, Rragc, Fnbp1, Ube2i                                                                                                                                      |
| ENSMUST00000119305 | miR-3113-5p                                      | Fsd1l                                                                                                                                                                  |



**Table S10.** Information of the lncRNA-miRNA network in the cerebral cortex and hippocampus of 7-month-old 5×FAD mice.

| lncRNA             | miRNA targets |
|--------------------|---------------|
| ENSMUSG00000098912 | miR-380-3p    |
| ENSMUSG00000098912 | miR-1933-3p   |
| ENSMUSG00000098912 | miR-743b-3p   |
| ENSMUSG00000098912 | miR-877-5p    |
| ENSMUSG00000098912 | miR-433-3p    |
| ENSMUSG00000098912 | miR-669b-5p   |
| ENSMUSG00000098912 | miR-1955-5p   |
| ENSMUSG00000098912 | miR-214-3p    |
| ENSMUSG00000098912 | miR-3079-3p   |
| ENSMUSG00000098912 | miR-7080-3p   |
| ENSMUSG00000098912 | miR-24-3p     |
| ENSMUSG00000098912 | miR-411-5p    |
| ENSMUSG00000098912 | miR-153-3p    |
| ENSMUSG00000098912 | miR-3060-3p   |
| ENSMUSG00000098912 | miR-195a-5p   |
| ENSMUSG00000098912 | miR-15b-5p    |
| ENSMUSG00000098912 | miR-15a-5p    |
| ENSMUSG00000098912 | miR-16-5p     |
| ENSMUSG00000098912 | miR-322-5p    |
| ENSMUSG00000098912 | miR-497a-5p   |
| ENSMUSG00000098912 | miR-195b      |
| ENSMUSG00000098912 | miR-3065-5p   |
| ENSMUSG00000098912 | miR-3083-5p   |
| ENSMUSG00000098912 | miR-193a-3p   |
| ENSMUSG00000098912 | miR-193b-3p   |
| ENSMUSG00000098912 | miR-18a-5p    |
| ENSMUSG00000098912 | miR-3070-5p   |
| ENSMUSG00000098912 | miR-6958-3p   |
| ENSMUSG00000098912 | miR-488-3p    |
| ENSMUSG00000098912 | miR-7010-5p   |
| ENSMUSG00000098912 | miR-145b      |
| ENSMUSG00000098912 | miR-8120      |
| ENSMUSG00000098912 | miR-6914-3p   |
| ENSMUSG00000098912 | miR-212-5p    |
| ENSMUSG00000098912 | miR-127-5p    |
| ENSMUSG00000098912 | miR-7043-3p   |
| ENSMUSG00000098912 | miR-7027-5p   |
| ENSMUSG00000098912 | miR-151-5p    |
| ENSMUSG00000098912 | miR-669p-5p   |
| ENSMUSG00000098912 | miR-29c-5p    |
| ENSMUSG00000098912 | miR-3058-3p   |

---

|                    |               |
|--------------------|---------------|
| ENSMUSG00000098912 | miR-540-3p    |
| ENSMUST00000127786 | miR-669h-5p   |
| ENSMUST00000127786 | miR-674-3p    |
| ENSMUST00000127786 | miR-7117-5p   |
| ENSMUST00000127786 | miR-547-5p    |
| ENSMUST00000127786 | miR-221-3p    |
| ENSMUST00000127786 | miR-874-3p    |
| ENSMUST00000127786 | miR-7688-5p   |
| ENSMUST00000127786 | miR-6937-5p   |
| ENSMUST00000127786 | miR-574-5p    |
| ENSMUST00000127786 | miR-135a-5p   |
| ENSMUST00000127786 | miR-3473e     |
| ENSMUST00000127786 | miR-582-5p    |
| ENSMUST00000127786 | miR-215-5p    |
| ENSMUST00000127786 | miR-7674-3p   |
| ENSMUST00000127786 | miR-344g-5p   |
| ENSMUST00000127786 | miR-26b-3p    |
| ENSMUST00000127786 | miR-344-3p    |
| ENSMUST00000127786 | miR-6240      |
| ENSMUST00000127786 | miR-3064-5p   |
| ENSMUST00000127786 | miR-6979-3p   |
| ENSMUST00000127786 | miR-129b-3p   |
| ENSMUST00000127786 | miR-7021-5p   |
| ENSMUST00000127786 | miR-153-3p    |
| ENSMUST00000127786 | miR-30e-5p    |
| ENSMUST00000127786 | miR-146a-5p   |
| ENSMUST00000127786 | miR-344d-1-5p |
| ENSMUST00000127786 | miR-143-3p    |
| ENSMUST00000127786 | miR-7000-3p   |
| ENSMUST00000127786 | miR-106b-5p   |
| ENSMUST00000127786 | miR-3095-5p   |
| ENSMUST00000127786 | miR-669l-5p   |
| ENSMUST00000127786 | miR-493-5p    |
| ENSMUST00000127786 | miR-673-5p    |
| ENSMUST00000127786 | miR-3081-3p   |
| ENSMUST00000127786 | miR-1934-5p   |
| ENSMUST00000127786 | miR-31-5p     |
| ENSMUST00000127786 | miR-1927      |
| ENSMUST00000127786 | miR-6537-3p   |
| ENSMUST00000127786 | miR-148a-5p   |
| ENSMUST00000127786 | miR-3067-5p   |
| ENSMUST00000127786 | miR-26a-5p    |
| ENSMUST00000127786 | miR-181b-1-3p |
| ENSMUST00000127786 | miR-133a-3p   |

---

---

|                    |               |
|--------------------|---------------|
| ENSMUST00000127786 | miR-29b-3p    |
| ENSMUST00000127786 | miR-302d-3p   |
| ENSMUST00000127786 | miR-3112-5p   |
| ENSMUST00000127786 | miR-467a-3p   |
| ENSMUST00000127786 | miR-3105-3p   |
| ENSMUST00000127786 | miR-130a-5p   |
| ENSMUST00000127786 | miR-3097-5p   |
| ENSMUST00000127786 | miR-137-5p    |
| ENSMUST00000127786 | miR-1933-3p   |
| ENSMUST00000127786 | miR-1946a     |
| ENSMUST00000127786 | miR-682       |
| ENSMUST00000127786 | miR-7037-5p   |
| ENSMUST00000127786 | miR-704       |
| ENSMUST00000127786 | miR-411-3p    |
| ENSMUST00000127786 | miR-7016-5p   |
| ENSMUST00000127786 | miR-6999-5p   |
| ENSMUST00000127786 | miR-6927-3p   |
| ENSMUST00000127786 | miR-503-3p    |
| ENSMUST00000127786 | miR-30f       |
| ENSMUST00000127786 | miR-3098-3p   |
| ENSMUST00000127786 | miR-125b-2-3p |
| ENSMUST00000127786 | miR-322-5p    |
| ENSMUST00000127786 | miR-500-5p    |
| ENSMUST00000127786 | miR-6933-3p   |
| ENSMUST00000127786 | miR-7116-3p   |
| ENSMUST00000127786 | miR-301b-3p   |
| ENSMUST00000127786 | miR-30b-5p    |
| ENSMUST00000127786 | miR-344-5p    |
| ENSMUST00000127786 | miR-345-5p    |
| ENSMUST00000127786 | miR-7115-3p   |
| ENSMUST00000127786 | miR-690       |
| ENSMUST00000127786 | miR-3102-3p   |
| ENSMUST00000127786 | miR-299a-5p   |
| ENSMUST00000127786 | miR-3074-1-3p |
| ENSMUST00000127786 | miR-505-5p    |
| ENSMUST00000127786 | miR-6395      |
| ENSMUST00000127786 | miR-494-3p    |
| ENSMUST00000127786 | miR-223-5p    |
| ENSMUST00000127786 | miR-488-3p    |
| ENSMUST00000127786 | miR-152-5p    |
| ENSMUST00000127786 | miR-7019-3p   |
| ENSMUST00000127786 | miR-6516-3p   |
| ENSMUST00000127786 | miR-6982-5p   |
| ENSMUST00000127786 | miR-1946b     |

---

---

|                    |               |
|--------------------|---------------|
| ENSMUST00000127786 | miR-185-3p    |
| ENSMUST00000127786 | miR-3080-3p   |
| ENSMUST00000127786 | miR-412-3p    |
| ENSMUST00000127786 | miR-501-5p    |
| ENSMUST00000127786 | miR-743b-3p   |
| ENSMUST00000127786 | miR-1843a-5p  |
| ENSMUST00000127786 | miR-337-3p    |
| ENSMUST00000127786 | miR-6975-3p   |
| ENSMUST00000127786 | miR-6925-5p   |
| ENSMUST00000127786 | miR-26a-2-3p  |
| ENSMUST00000127786 | miR-669i      |
| ENSMUST00000127786 | miR-134-5p    |
| ENSMUST00000127786 | miR-669k-5p   |
| ENSMUST00000127786 | miR-411-5p    |
| ENSMUST00000127786 | miR-191-5p    |
| ENSMUST00000127786 | miR-183-3p    |
| ENSMUST00000127786 | miR-20a-5p    |
| ENSMUST00000127786 | miR-7687-3p   |
| ENSMUST00000127786 | miR-124-3p    |
| ENSMUST00000127786 | miR-7651-5p   |
| ENSMUST00000127786 | miR-3082-5p   |
| ENSMUST00000127786 | let-7f-2-3p   |
| ENSMUST00000127786 | miR-7663-5p   |
| ENSMUST00000127786 | miR-6947-5p   |
| ENSMUST00000127786 | miR-216b-5p   |
| ENSMUST00000127786 | miR-3103-3p   |
| ENSMUST00000127786 | miR-344d-3-5p |
| ENSMUST00000127786 | miR-1930-5p   |
| ENSMUST00000127786 | miR-7662-3p   |
| ENSMUST00000127786 | miR-296-5p    |
| ENSMUST00000127786 | miR-497a-5p   |
| ENSMUST00000127786 | miR-210-5p    |
| ENSMUST00000127786 | miR-6911-5p   |
| ENSMUST00000127786 | miR-665-5p    |
| ENSMUST00000127786 | miR-30e-3p    |
| ENSMUST00000127786 | miR-500-3p    |
| ENSMUST00000127786 | miR-1912-3p   |
| ENSMUST00000127786 | miR-224-5p    |
| ENSMUST00000127786 | miR-101a-3p   |
| ENSMUST00000127786 | miR-551b-5p   |
| ENSMUST00000127786 | miR-7031-5p   |
| ENSMUST00000127786 | miR-6982-3p   |
| ENSMUST00000127786 | miR-5623-5p   |
| ENSMUST00000127786 | miR-8118      |

---

---

|                    |             |
|--------------------|-------------|
| ENSMUST00000127786 | miR-3084-5p |
| ENSMUST00000127786 | miR-592-5p  |
| ENSMUST00000127786 | miR-195b    |
| ENSMUST00000127786 | miR-7024-3p |
| ENSMUST00000127786 | miR-96-5p   |
| ENSMUST00000127786 | miR-1298-5p |
| ENSMUST00000127786 | miR-486b-3p |
| ENSMUST00000127786 | miR-7b-5p   |
| ENSMUST00000127786 | miR-1949    |
| ENSMUST00000127786 | miR-693-3p  |
| ENSMUST00000127786 | miR-3473a   |
| ENSMUST00000127786 | miR-3066-5p |
| ENSMUST00000127786 | miR-664-3p  |
| ENSMUST00000127786 | miR-384-5p  |
| ENSMUST00000127786 | miR-351-5p  |
| ENSMUST00000127786 | miR-6921-3p |
| ENSMUST00000127786 | miR-471-5p  |
| ENSMUST00000127786 | miR-7032-3p |
| ENSMUST00000127786 | miR-5710    |
| ENSMUST00000127786 | miR-3474    |
| ENSMUST00000127786 | miR-379-3p  |
| ENSMUST00000127786 | miR-381-3p  |
| ENSMUST00000127786 | miR-486a-5p |
| ENSMUST00000127786 | miR-7054-5p |
| ENSMUST00000127786 | miR-493-3p  |
| ENSMUST00000127786 | miR-6481    |
| ENSMUST00000127786 | let-7a-5p   |
| ENSMUST00000127786 | miR-181b-5p |
| ENSMUST00000127786 | miR-344c-5p |
| ENSMUST00000127786 | miR-431-3p  |
| ENSMUST00000127786 | miR-6913-5p |
| ENSMUST00000127786 | miR-1931    |
| ENSMUST00000127786 | miR-346-3p  |
| ENSMUST00000127786 | miR-23a-3p  |
| ENSMUST00000127786 | miR-466c-3p |
| ENSMUST00000127786 | miR-7675-3p |
| ENSMUST00000127786 | miR-6911-3p |
| ENSMUST00000127786 | miR-7066-3p |
| ENSMUST00000127786 | miR-1231-5p |
| ENSMUST00000127786 | miR-3963    |
| ENSMUST00000127786 | miR-409-5p  |
| ENSMUST00000127786 | miR-6928-5p |
| ENSMUST00000127786 | miR-345-3p  |
| ENSMUST00000127786 | miR-362-3p  |

---

---

|                    |               |
|--------------------|---------------|
| ENSMUST00000127786 | miR-3074-5p   |
| ENSMUST00000127786 | miR-1191a     |
| ENSMUST00000127786 | miR-9-5p      |
| ENSMUST00000127786 | miR-3970      |
| ENSMUST00000127786 | miR-1197-3p   |
| ENSMUST00000127786 | miR-7087-5p   |
| ENSMUST00000127786 | miR-29c-3p    |
| ENSMUST00000127786 | miR-155-5p    |
| ENSMUST00000127786 | miR-6976-5p   |
| ENSMUST00000127786 | miR-669c-3p   |
| ENSMUST00000127786 | miR-183-5p    |
| ENSMUST00000127786 | let-7g-5p     |
| ENSMUST00000127786 | miR-504-5p    |
| ENSMUST00000127786 | miR-3099-3p   |
| ENSMUST00000127786 | miR-3085-3p   |
| ENSMUST00000127786 | miR-7066-5p   |
| ENSMUST00000127786 | miR-6906-5p   |
| ENSMUST00000127786 | miR-3089-5p   |
| ENSMUST00000127786 | miR-350-5p    |
| ENSMUST00000127786 | miR-3080-5p   |
| ENSMUST00000127786 | miR-137-3p    |
| ENSMUST00000127786 | miR-199a-3p   |
| ENSMUST00000127786 | miR-3473d     |
| ENSMUST00000127786 | miR-449a-5p   |
| ENSMUST00000127786 | miR-135b-5p   |
| ENSMUST00000127786 | miR-410-5p    |
| ENSMUST00000127786 | miR-146b-3p   |
| ENSMUST00000127786 | miR-324-3p    |
| ENSMUST00000127786 | miR-466b-3p   |
| ENSMUST00000127786 | miR-302b-3p   |
| ENSMUST00000127786 | miR-3473g     |
| ENSMUST00000127786 | miR-135a-2-3p |
| ENSMUST00000127786 | miR-374b-5p   |
| ENSMUST00000127786 | miR-1b-5p     |
| ENSMUST00000127786 | miR-34a-3p    |
| ENSMUST00000127786 | miR-98-5p     |
| ENSMUST00000127786 | miR-741-3p    |
| ENSMUST00000127786 | miR-7042-5p   |
| ENSMUST00000127786 | miR-150-5p    |
| ENSMUST00000127786 | let-7f-5p     |
| ENSMUST00000127786 | miR-539-5p    |
| ENSMUST00000127786 | miR-3109-5p   |
| ENSMUST00000127786 | miR-34a-5p    |
| ENSMUST00000127786 | miR-6902-3p   |

---

---

|                    |               |
|--------------------|---------------|
| ENSMUST00000127786 | miR-1969      |
| ENSMUST00000127786 | miR-8111      |
| ENSMUST00000127786 | miR-1264-3p   |
| ENSMUST00000127786 | miR-669a-5p   |
| ENSMUST00000127786 | miR-34c-5p    |
| ENSMUST00000127786 | miR-200c-3p   |
| ENSMUST00000127786 | miR-5624-3p   |
| ENSMUST00000127786 | miR-466i-3p   |
| ENSMUST00000127786 | miR-141-3p    |
| ENSMUST00000127786 | miR-3064-3p   |
| ENSMUST00000127786 | miR-30c-1-3p  |
| ENSMUST00000127786 | miR-181b-2-3p |
| ENSMUST00000127786 | miR-125a-5p   |
| ENSMUST00000127786 | miR-200b-3p   |
| ENSMUST00000127786 | miR-344d-3p   |
| ENSMUST00000127786 | miR-361-5p    |
| ENSMUST00000127786 | miR-216a-5p   |
| ENSMUST00000127786 | miR-221-5p    |
| ENSMUST00000127786 | miR-483-5p    |
| ENSMUST00000127786 | miR-3093-3p   |
| ENSMUST00000127786 | miR-7646-5p   |
| ENSMUST00000127786 | miR-101b-3p   |
| ENSMUST00000127786 | miR-30a-3p    |
| ENSMUST00000127786 | miR-33-5p     |
| ENSMUST00000127786 | miR-6946-5p   |
| ENSMUST00000127786 | miR-449b      |
| ENSMUST00000127786 | miR-16-5p     |
| ENSMUST00000127786 | miR-127-3p    |
| ENSMUST00000127786 | miR-140-5p    |
| ENSMUST00000127786 | miR-7664-5p   |
| ENSMUST00000127786 | miR-222-5p    |
| ENSMUST00000127786 | miR-30a-5p    |
| ENSMUST00000127786 | miR-872-5p    |
| ENSMUST00000127786 | miR-93-5p     |
| ENSMUST00000127786 | miR-155-3p    |
| ENSMUST00000127786 | miR-145b      |
| ENSMUST00000127786 | miR-7013-3p   |
| ENSMUST00000127786 | miR-466l-3p   |
| ENSMUST00000127786 | miR-466c-3p   |
| ENSMUST00000127786 | miR-344c-3p   |
| ENSMUST00000127786 | miR-3086-3p   |
| ENSMUST00000127786 | miR-15a-3p    |
| ENSMUST00000127786 | miR-665-3p    |
| ENSMUST00000127786 | miR-3473b     |

---

---

|                    |             |
|--------------------|-------------|
| ENSMUST00000127786 | miR-146b-5p |
| ENSMUST00000127786 | miR-1948-5p |
| ENSMUST00000127786 | let-7i-5p   |
| ENSMUST00000127786 | miR-378b    |
| ENSMUST00000127786 | miR-664-5p  |
| ENSMUST00000127786 | miR-6910-3p |
| ENSMUST00000127786 | miR-7061-5p |
| ENSMUST00000127786 | miR-465c-5p |
| ENSMUST00000127786 | miR-200a-3p |
| ENSMUST00000127786 | miR-6991-5p |
| ENSMUST00000127786 | miR-329-3p  |
| ENSMUST00000127786 | miR-186-5p  |
| ENSMUST00000127786 | miR-6540-5p |
| ENSMUST00000127786 | miR-195a-5p |
| ENSMUST00000127786 | miR-320-3p  |
| ENSMUST00000127786 | miR-491-3p  |
| ENSMUST00000127786 | miR-410-3p  |
| ENSMUST00000127786 | miR-330-3p  |
| ENSMUST00000127786 | miR-298-5p  |
| ENSMUST00000127786 | miR-10a-5p  |
| ENSMUST00000127786 | miR-10b-5p  |
| ENSMUST00000127786 | miR-760-5p  |
| ENSMUST00000127786 | miR-7b-3p   |
| ENSMUST00000127786 | miR-296-3p  |
| ENSMUST00000127786 | miR-335-3p  |
| ENSMUST00000127786 | miR-19b-3p  |
| ENSMUST00000127786 | miR-5101    |
| ENSMUST00000127786 | miR-3087-3p |
| ENSMUST00000127786 | miR-702-5p  |
| ENSMUST00000127786 | miR-127-5p  |
| ENSMUST00000127786 | miR-297a-3p |
| ENSMUST00000127786 | miR-125b-5p |
| ENSMUST00000127786 | miR-17-5p   |
| ENSMUST00000127786 | miR-19a-3p  |
| ENSMUST00000127786 | miR-3113-5p |
| ENSMUST00000127786 | miR-3470b   |
| ENSMUST00000127786 | miR-300-3p  |
| ENSMUST00000127786 | miR-138-5p  |
| ENSMUST00000127786 | miR-124-5p  |
| ENSMUST00000127786 | miR-1224-5p |
| ENSMUST00000127786 | miR-669b-5p |
| ENSMUST00000127786 | miR-384-3p  |
| ENSMUST00000127786 | miR-1955-3p |
| ENSMUST00000127786 | miR-425-5p  |

---



---

|                    |                  |
|--------------------|------------------|
| ENSMUST00000127786 | miR-6937-3p      |
| ENSMUST00000127786 | miR-362-5p       |
| ENSMUST00000127786 | miR-7116-5p      |
| ENSMUST00000127786 | miR-222-3p       |
| ENSMUST00000127786 | miR-3086-5p      |
| ENSMUST00000127786 | miR-423-5p       |
| ENSMUST00000127786 | miR-3095-3p      |
| ENSMUST00000127786 | miR-3079-3p      |
| ENSMUST00000127786 | miR-6539         |
| ENSMUST00000127786 | miR-669p-3p      |
| ENSMUST00000127786 | miR-708-3p       |
| ENSMUST00000127786 | miR-670-5p       |
| ENSMUST00000127786 | miR-466o-3p      |
| ENSMUST00000127786 | miR-5617-5p      |
| ENSMUST00000127786 | miR-669e-3p      |
| ENSMUST00000127786 | miR-7224-3p      |
| ENSMUST00000127786 | miR-6919-5p      |
| ENSMUST00000127786 | miR-489-3p       |
| ENSMUST00000127786 | miR-145a-5p      |
| ENSMUST00000127786 | miR-338-5p       |
| ENSMUST00000127786 | miR-7037-3p      |
| ENSMUST00000127786 | miR-10a-3p       |
| ENSMUST00000127786 | miR-7085-3p      |
| ENSMUST00000127786 | miR-6970-5p      |
| ENSMUST00000127786 | miR-107-5p       |
| ENSMUST00000127786 | miR-679-3p       |
| ENSMUST00000127786 | let-7e-5p        |
| ENSMUST00000127786 | miR-1224-3p      |
| ENSMUST00000127786 | miR-541-3p       |
| ENSMUST00000127786 | miR-344d-2-5p    |
| ENSMUST00000127786 | miR-219a-5p      |
| ENSMUST00000127786 | miR-9-3p         |
| ENSMUST00000127786 | miR-27b-3p       |
| ENSMUST00000127786 | miR-344e-3p      |
| ENSMUST00000127786 | miR-3102-5p.2-5p |
| ENSMUST00000127786 | miR-135a-1-3p    |
| ENSMUST00000127786 | miR-186-3p       |
| ENSMUST00000127786 | miR-6896-5p      |
| ENSMUST00000127786 | miR-1198-5p      |
| ENSMUST00000127786 | miR-483-3p       |
| ENSMUST00000127786 | miR-130b-3p      |
| ENSMUST00000127786 | miR-212-3p       |
| ENSMUST00000127786 | miR-7039-5p      |
| ENSMUST00000127786 | miR-15b-5p       |

---

---

|                    |               |
|--------------------|---------------|
| ENSMUST00000127786 | miR-338-3p    |
| ENSMUST00000127786 | miR-1298-3p   |
| ENSMUST00000127786 | miR-466n-3p   |
| ENSMUST00000127786 | miR-128-3p    |
| ENSMUST00000127786 | miR-382-3p    |
| ENSMUST00000127786 | miR-219b-3p   |
| ENSMUST00000127786 | miR-470-5p    |
| ENSMUST00000127786 | miR-29a-3p    |
| ENSMUST00000127786 | miR-669f-3p   |
| ENSMUST00000127786 | miR-23b-3p    |
| ENSMUST00000127786 | miR-543-3p    |
| ENSMUST00000127786 | miR-7224-5p   |
| ENSMUST00000127786 | miR-27a-3p    |
| ENSMUST00000127786 | miR-450a-2-3p |
| ENSMUST00000127786 | miR-7665-5p   |
| ENSMUST00000127786 | miR-3475-3p   |
| ENSMUST00000127786 | miR-429-3p    |
| ENSMUST00000127786 | miR-449c-5p   |
| ENSMUST00000127786 | miR-7661-3p   |
| ENSMUST00000127786 | miR-181d-5p   |
| ENSMUST00000127786 | miR-192-5p    |
| ENSMUST00000127786 | miR-7226-3p   |
| ENSMUST00000127786 | miR-133b-3p   |
| ENSMUST00000127786 | miR-3065-5p   |
| ENSMUST00000127786 | miR-5621-3p   |
| ENSMUST00000127786 | miR-6896-3p   |
| ENSMUST00000127786 | miR-181c-5p   |
| ENSMUST00000127786 | miR-20b-5p    |
| ENSMUST00000127786 | miR-669p-5p   |
| ENSMUST00000127786 | miR-880-3p    |
| ENSMUST00000127786 | miR-144-3p    |
| ENSMUST00000127786 | miR-499-5p    |
| ENSMUST00000127786 | miR-24-3p     |
| ENSMUST00000127786 | miR-329-5p    |
| ENSMUST00000127786 | miR-544-3p    |
| ENSMUST00000127786 | miR-1188-5p   |
| ENSMUST00000127786 | miR-6985-3p   |
| ENSMUST00000127786 | miR-3058-3p   |
| ENSMUST00000127786 | miR-7092-3p   |
| ENSMUST00000127786 | miR-543-5p    |
| ENSMUST00000127786 | miR-148b-3p   |
| ENSMUST00000127786 | miR-377-3p    |
| ENSMUST00000127786 | miR-214-3p    |
| ENSMUST00000127786 | miR-7064-5p   |

---

---

|                    |               |
|--------------------|---------------|
| ENSMUST00000127786 | miR-450a-1-3p |
| ENSMUST00000127786 | miR-540-5p    |
| ENSMUST00000127786 | miR-106a-5p   |
| ENSMUST00000127786 | miR-5615-5p   |
| ENSMUST00000127786 | miR-5615-3p   |
| ENSMUST00000127786 | miR-201-5p    |
| ENSMUST00000127786 | miR-26b-5p    |
| ENSMUST00000127786 | miR-130b-5p   |
| ENSMUST00000127786 | miR-466m-3p   |
| ENSMUST00000127786 | miR-326-3p    |
| ENSMUST00000127786 | let-7b-5p     |
| ENSMUST00000127786 | miR-879-5p    |
| ENSMUST00000127786 | miR-466p-3p   |
| ENSMUST00000127786 | miR-152-3p    |
| ENSMUST00000127786 | miR-3057-5p   |
| ENSMUST00000127786 | miR-6903-3p   |
| ENSMUST00000127786 | miR-466q      |
| ENSMUST00000127786 | miR-3094-5p   |
| ENSMUST00000127786 | miR-6971-3p   |
| ENSMUST00000127786 | miR-187-5p    |
| ENSMUST00000127786 | miR-328-3p    |
| ENSMUST00000127786 | miR-224-3p    |
| ENSMUST00000127786 | miR-135b-3p   |
| ENSMUST00000127786 | miR-3472      |
| ENSMUST00000127786 | miR-669a-3-3p |
| ENSMUST00000127786 | miR-694       |
| ENSMUST00000127786 | miR-1981-5p   |
| ENSMUST00000127786 | miR-7085-5p   |
| ENSMUST00000127786 | miR-669o-3p   |
| ENSMUST00000127786 | miR-758-3p    |
| ENSMUST00000127786 | miR-199b-3p   |
| ENSMUST00000127786 | miR-153-5p    |
| ENSMUST00000127786 | miR-107-3p    |
| ENSMUST00000127786 | miR-669b-3p   |
| ENSMUST00000127786 | miR-378a-3p   |
| ENSMUST00000127786 | miR-22-3p     |
| ENSMUST00000127786 | miR-7022-5p   |
| ENSMUST00000127786 | miR-7080-3p   |
| ENSMUST00000127786 | miR-3967      |
| ENSMUST00000127786 | miR-6945-3p   |
| ENSMUST00000127786 | miR-505-3p    |
| ENSMUST00000127786 | miR-7a-2-3p   |
| ENSMUST00000127786 | miR-7015-3p   |
| ENSMUST00000127786 | miR-6984-5p   |

---

---

|                    |              |
|--------------------|--------------|
| ENSMUST00000127786 | miR-669a-3p  |
| ENSMUST00000127786 | miR-7240-5p  |
| ENSMUST00000127786 | miR-669f-5p  |
| ENSMUST00000127786 | miR-764-5p   |
| ENSMUST00000127786 | miR-3098-5p  |
| ENSMUST00000127786 | miR-672-3p   |
| ENSMUST00000127786 | miR-501-3p   |
| ENSMUST00000127786 | let-7d-5p    |
| ENSMUST00000127786 | miR-148a-3p  |
| ENSMUST00000127786 | miR-3059-5p  |
| ENSMUST00000127786 | miR-7004-5p  |
| ENSMUST00000127786 | miR-188-5p   |
| ENSMUST00000127786 | miR-342-3p   |
| ENSMUST00000127786 | miR-6916-3p  |
| ENSMUST00000127786 | miR-145a-3p  |
| ENSMUST00000127786 | miR-421-3p   |
| ENSMUST00000127786 | miR-350-3p   |
| ENSMUST00000127786 | miR-148b-5p  |
| ENSMUST00000127786 | miR-376c-3p  |
| ENSMUST00000127786 | miR-8106     |
| ENSMUST00000127786 | miR-3069-5p  |
| ENSMUST00000127786 | miR-7a-5p    |
| ENSMUST00000127786 | miR-378c     |
| ENSMUST00000127786 | miR-448-3p   |
| ENSMUST00000127786 | miR-6999-3p  |
| ENSMUST00000127786 | miR-330-5p   |
| ENSMUST00000127786 | miR-6914-3p  |
| ENSMUST00000127786 | miR-130a-3p  |
| ENSMUST00000127786 | miR-3091-3p  |
| ENSMUST00000127786 | miR-455-3p   |
| ENSMUST00000127786 | miR-6905-3p  |
| ENSMUST00000127786 | miR-6918-5p  |
| ENSMUST00000127786 | miR-103-3p   |
| ENSMUST00000127786 | miR-466f-3p  |
| ENSMUST00000127786 | miR-301a-3p  |
| ENSMUST00000127786 | miR-7013-5p  |
| ENSMUST00000127786 | miR-1258-3p  |
| ENSMUST00000127786 | miR-129-2-3p |
| ENSMUST00000127786 | miR-669e-5p  |
| ENSMUST00000127786 | miR-30d-3p   |
| ENSMUST00000127786 | miR-539-3p   |
| ENSMUST00000127786 | miR-140-3p   |
| ENSMUST00000127786 | miR-6997-5p  |
| ENSMUST00000127786 | miR-185-5p   |

---

---

|                    |             |
|--------------------|-------------|
| ENSMUST00000127786 | miR-7236-3p |
| ENSMUST00000127786 | miR-34b-5p  |
| ENSMUST00000127786 | miR-217-5p  |
| ENSMUST00000127786 | miR-3060-3p |
| ENSMUST00000127786 | miR-297c-3p |
| ENSMUST00000127786 | miR-3083-5p |
| ENSMUST00000127786 | miR-344b-3p |
| ENSMUST00000127786 | miR-203-3p  |
| ENSMUST00000127786 | miR-30d-5p  |
| ENSMUST00000127786 | miR-674-5p  |
| ENSMUST00000127786 | miR-300-5p  |
| ENSMUST00000127786 | miR-5709-5p |
| ENSMUST00000127786 | miR-15a-5p  |
| ENSMUST00000127786 | miR-20a-3p  |
| ENSMUST00000127786 | miR-486a-3p |
| ENSMUST00000127786 | miR-30c-5p  |
| ENSMUST00000127786 | miR-497b    |
| ENSMUST00000127786 | miR-7077-5p |
| ENSMUST00000127786 | miR-8114    |
| ENSMUST00000127786 | miR-132-3p  |
| ENSMUST00000127786 | miR-511-5p  |
| ENSMUST00000127786 | miR-1943-5p |
| ENSMUST00000127786 | let-7k      |
| ENSMUST00000127786 | miR-1961    |
| ENSMUST00000127786 | miR-181a-5p |
| ENSMUST00000127786 | miR-5620-3p |
| ENSMUST00000127786 | miR-7038-3p |
| ENSMUST00000127786 | miR-466a-3p |
| ENSMUST00000127786 | miR-383-3p  |
| ENSMUST00000127786 | miR-1198-3p |
| ENSMUST00000127786 | miR-6899-3p |
| ENSMUST00000127786 | miR-1912-5p |
| ENSMUST00000127786 | miR-6516-5p |
| ENSMUST00000127786 | miR-465a-5p |
| ENSMUST00000127786 | miR-203-5p  |
| ENSMUST00000127786 | let-7c-5p   |
| ENSMUST00000127786 | miR-322-3p  |
| ENSMUST00000127786 | miR-615-3p  |
| ENSMUST00000127786 | miR-666-3p  |
| ENSMUST00000127786 | miR-3094-3p |
| ENSMUST00000127786 | miR-667-3p  |
| ENSMUST00000127786 | miR-1941-5p |
| ENSMUST00000127786 | miR-466d-3p |
| ENSMUST00000127786 | miR-6967-5p |

---

---

|                    |              |
|--------------------|--------------|
| ENSMUST00000127786 | miR-92a-1-5p |
| ENSMUST00000127786 | miR-1983     |
| ENSMUST00000127786 | miR-204-3p   |
| ENSMUST00000127786 | miR-486b-5p  |
| ENSMUST00000127786 | miR-6964-3p  |
| ENSMUST00000127786 | miR-192-3p   |
| ENSMUST00000127786 | miR-3058-5p  |
| ENSMUST00000127786 | miR-297b-3p  |
| ENSMUST00000127786 | miR-494-5p   |
| ENSMUST00000127786 | miR-7047-3p  |
| ENSMUST00000127786 | miR-331-3p   |
| ENSMUST00000127786 | miR-3062-5p  |
| ENSMUST00000127786 | miR-448-5p   |
| ENSMUST00000127786 | miR-340-5p   |
| ENSMUST00000127786 | miR-3078-5p  |
| ENSMUST00000127786 | miR-129-1-3p |
| ENSMUST00000127786 | miR-30c-2-3p |
| ENSMUST00000127786 | miR-503-5p   |
| ENSMUST00000127786 | miR-450b-3p  |
| ENSMUST00000127786 | miR-1191b-5p |
| MSTRG.11359.1      | miR-7667-3p  |
| MSTRG.11359.1      | miR-365-2-5p |
| MSTRG.11359.1      | miR-365-1-5p |
| MSTRG.11359.1      | miR-3093-3p  |
| MSTRG.11359.1      | miR-6994-3p  |
| MSTRG.17500.2      | miR-6900-3p  |
| MSTRG.17500.2      | miR-195a-3p  |
| MSTRG.17500.2      | miR-346-3p   |
| MSTRG.17500.2      | miR-532-5p   |
| MSTRG.17500.2      | miR-466q     |
| MSTRG.17500.2      | miR-669h-5p  |
| MSTRG.17500.2      | miR-3572-5p  |
| MSTRG.17500.2      | miR-7224-5p  |
| MSTRG.17500.2      | miR-7663-3p  |
| MSTRG.17500.2      | miR-466n-3p  |
| MSTRG.17500.2      | miR-3106-5p  |
| MSTRG.17500.2      | miR-694      |
| MSTRG.17500.2      | miR-7667-3p  |
| MSTRG.17500.2      | miR-150-5p   |
| MSTRG.17500.2      | miR-879-5p   |
| MSTRG.17500.2      | miR-300-5p   |
| MSTRG.17500.2      | miR-338-5p   |
| MSTRG.17500.2      | miR-301b-5p  |
| MSTRG.17500.2      | miR-301a-5p  |

---

---

|               |               |
|---------------|---------------|
| MSTRG.17500.2 | miR-145b      |
| MSTRG.17500.2 | miR-145a-5p   |
| MSTRG.17500.2 | miR-741-3p    |
| MSTRG.17500.2 | miR-3094-5p   |
| MSTRG.17500.2 | miR-133a-5p   |
| MSTRG.17500.2 | miR-3065-5p   |
| MSTRG.17500.2 | miR-450a-2-3p |
| MSTRG.17500.2 | miR-7031-5p   |
| MSTRG.17500.2 | miR-323-5p    |
| MSTRG.17500.2 | miR-3074-5p   |
| MSTRG.17500.2 | miR-1249-5p   |
| MSTRG.17500.2 | miR-7052-3p   |
| MSTRG.17500.2 | miR-6951-5p   |
| MSTRG.17500.2 | miR-466p-3p   |
| MSTRG.17500.2 | miR-466c-3p   |
| MSTRG.17500.2 | miR-466b-3p   |
| MSTRG.17500.2 | miR-7063-5p   |
| MSTRG.17500.2 | miR-362-3p    |
| MSTRG.17500.2 | miR-329-3p    |
| MSTRG.17500.2 | miR-6958-3p   |
| MSTRG.17500.2 | miR-344i      |
| MSTRG.17500.2 | miR-1929-3p   |
| MSTRG.17500.2 | miR-1193-3p   |
| MSTRG.17500.2 | miR-7084-5p   |
| MSTRG.17500.2 | miR-466f-3p   |
| MSTRG.17500.2 | miR-7015-3p   |
| MSTRG.17500.2 | miR-493-5p    |
| MSTRG.17500.2 | miR-134-3p    |
| MSTRG.17500.2 | miR-7093-3p   |
| MSTRG.17500.2 | miR-6994-5p   |
| MSTRG.17500.2 | miR-551b-5p   |
| MSTRG.17500.2 | miR-696       |
| MSTRG.17500.2 | miR-7077-3p   |
| MSTRG.17500.2 | miR-433-3p    |
| MSTRG.17500.2 | miR-1943-5p   |
| MSTRG.17500.2 | miR-5615-5p   |
| MSTRG.17500.2 | miR-3064-3p   |
| MSTRG.17500.2 | miR-330-5p    |
| MSTRG.17500.2 | miR-383-3p    |
| MSTRG.17500.2 | miR-7065-3p   |
| MSTRG.17500.2 | miR-491-3p    |
| MSTRG.17500.2 | miR-7048-3p   |
| MSTRG.17500.2 | miR-6985-5p   |
| MSTRG.17500.2 | miR-299b-3p   |

---

---

|               |               |
|---------------|---------------|
| MSTRG.17500.2 | miR-299a-3p   |
| MSTRG.17500.2 | miR-544-5p    |
| MSTRG.17500.2 | miR-706       |
| MSTRG.17500.2 | miR-199b-5p   |
| MSTRG.17500.2 | miR-199a-5p   |
| MSTRG.17500.2 | miR-222-5p    |
| MSTRG.17500.2 | miR-1948-5p   |
| MSTRG.17500.2 | miR-3085-3p   |
| MSTRG.17500.2 | miR-3064-5p   |
| MSTRG.17500.2 | miR-7064-5p   |
| MSTRG.17500.2 | miR-6985-3p   |
| MSTRG.17500.2 | miR-130b-5p   |
| MSTRG.17500.2 | miR-935       |
| MSTRG.17500.2 | miR-224-5p    |
| MSTRG.17500.2 | miR-3088-3p   |
| MSTRG.17500.2 | miR-3971      |
| MSTRG.17500.2 | miR-7052-5p   |
| MSTRG.17500.2 | miR-300-3p    |
| MSTRG.17500.2 | miR-1960      |
| MSTRG.17500.2 | miR-152-5p    |
| MSTRG.17500.2 | miR-7047-3p   |
| MSTRG.17500.2 | miR-195b      |
| MSTRG.17500.2 | miR-195a-5p   |
| MSTRG.17500.2 | miR-16-5p     |
| MSTRG.17500.2 | miR-15b-5p    |
| MSTRG.17500.2 | miR-15a-5p    |
| MSTRG.17500.2 | miR-326-3p    |
| MSTRG.17500.2 | miR-98-5p     |
| MSTRG.17500.2 | let-7k        |
| MSTRG.17500.2 | let-7i-5p     |
| MSTRG.17500.2 | let-7g-5p     |
| MSTRG.17500.2 | let-7f-5p     |
| MSTRG.17500.2 | let-7e-5p     |
| MSTRG.17500.2 | let-7c-5p     |
| MSTRG.17500.2 | let-7b-5p     |
| MSTRG.17500.2 | let-7a-5p     |
| MSTRG.17500.2 | miR-152-3p    |
| MSTRG.17500.2 | miR-148b-3p   |
| MSTRG.17500.2 | miR-148a-3p   |
| MSTRG.17500.2 | miR-6999-3p   |
| MSTRG.17500.2 | miR-669o-3p   |
| MSTRG.17500.2 | miR-669a-3p   |
| MSTRG.17500.2 | miR-669a-3-3p |
| MSTRG.17500.2 | miR-7685-5p   |

---



---

|               |             |
|---------------|-------------|
| MSTRG.17500.2 | miR-3094-3p |
| MSTRG.17500.2 | miR-3095-5p |
| MSTRG.17500.2 | miR-1941-3p |
| MSTRG.17500.2 | miR-1983    |
| MSTRG.17500.2 | miR-6912-5p |
| MSTRG.17500.2 | miR-488-5p  |
| MSTRG.17500.2 | miR-499-5p  |
| MSTRG.17500.2 | miR-101a-3p |
| MSTRG.17500.2 | miR-212-3p  |
| MSTRG.17500.2 | miR-132-3p  |
| MSTRG.17500.2 | miR-497a-5p |
| MSTRG.17500.2 | miR-322-5p  |
| MSTRG.17500.2 | miR-412-3p  |
| MSTRG.17500.2 | miR-6953-3p |
| MSTRG.17500.2 | miR-7085-3p |
| MSTRG.17500.2 | miR-669h-3p |
| MSTRG.17500.2 | miR-877-5p  |
| MSTRG.17500.2 | miR-8106    |
| MSTRG.17500.2 | miR-3066-3p |
| MSTRG.17500.2 | miR-142a-5p |
| MSTRG.17500.2 | miR-3966    |
| MSTRG.17500.2 | miR-8107    |
| MSTRG.17500.2 | miR-365-3p  |
| MSTRG.17500.2 | miR-7077-5p |
| MSTRG.17500.2 | miR-7689-3p |
| MSTRG.17500.2 | miR-6901-3p |
| MSTRG.17500.2 | miR-3084-3p |
| MSTRG.17500.2 | miR-698-5p  |
| MSTRG.17500.2 | miR-6948-3p |
| MSTRG.17500.2 | miR-7016-5p |
| MSTRG.17500.2 | miR-6967-5p |
| MSTRG.17500.2 | miR-324-3p  |
| MSTRG.17500.2 | miR-384-3p  |
| MSTRG.17500.2 | miR-3100-5p |
| MSTRG.17500.2 | miR-377-5p  |
| MSTRG.17500.2 | miR-669b-5p |
| MSTRG.17500.2 | let-7d-5p   |
| MSTRG.17500.2 | miR-7055-3p |
| MSTRG.17500.2 | miR-6540-3p |
| MSTRG.17500.2 | miR-370-5p  |
| MSTRG.17500.2 | miR-1b-3p   |
| MSTRG.17500.2 | miR-32-3p   |
| MSTRG.17500.2 | miR-5121    |
| MSTRG.17500.2 | miR-214-3p  |

---

---

|               |               |
|---------------|---------------|
| MSTRG.17500.2 | miR-6909-5p   |
| MSTRG.17500.2 | miR-770-3p    |
| MSTRG.17500.2 | miR-7656-5p   |
| MSTRG.17500.2 | miR-6769b-5p  |
| MSTRG.17500.2 | miR-30e-3p    |
| MSTRG.17500.2 | miR-30d-3p    |
| MSTRG.17500.2 | miR-30a-3p    |
| MSTRG.17500.2 | let-7j        |
| MSTRG.17500.2 | miR-6962-5p   |
| MSTRG.17500.2 | miR-504-5p    |
| MSTRG.17500.2 | miR-673-5p    |
| MSTRG.17500.2 | miR-3057-3p   |
| MSTRG.17500.2 | miR-5615-3p   |
| MSTRG.17500.2 | miR-709       |
| MSTRG.17500.2 | miR-873a-3p   |
| MSTRG.17500.2 | miR-3108-5p   |
| MSTRG.17500.2 | miR-6998-5p   |
| MSTRG.17500.2 | miR-346-5p    |
| MSTRG.17500.2 | miR-361-3p    |
| MSTRG.17500.2 | miR-7661-3p   |
| MSTRG.17500.2 | miR-142b      |
| MSTRG.17500.2 | miR-3099-3p   |
| MSTRG.17500.2 | miR-674-5p    |
| MSTRG.17500.2 | miR-1912-5p   |
| MSTRG.17500.2 | miR-701-3p    |
| MSTRG.17500.2 | miR-186-5p    |
| MSTRG.17500.2 | miR-5620-3p   |
| MSTRG.17500.2 | miR-7674-5p   |
| MSTRG.17500.2 | miR-5710      |
| MSTRG.17500.2 | miR-7024-3p   |
| MSTRG.17500.2 | miR-6964-3p   |
| MSTRG.17500.2 | miR-342-3p    |
| MSTRG.17500.2 | miR-344g-5p   |
| MSTRG.17500.2 | miR-344d-3-5p |
| MSTRG.17500.2 | miR-344d-1-5p |
| MSTRG.17500.2 | miR-344c-5p   |
| MSTRG.17500.2 | miR-344-5p    |
| MSTRG.17500.2 | miR-6944-5p   |
| MSTRG.17500.2 | miR-466i-3p   |
| MSTRG.17500.2 | miR-3087-3p   |
| MSTRG.17500.2 | miR-297b-5p   |
| MSTRG.17500.2 | miR-181d-3p   |
| MSTRG.17500.2 | miR-6941-5p   |
| MSTRG.17500.2 | miR-7649-3p   |

---

---

|               |               |
|---------------|---------------|
| MSTRG.17500.2 | miR-219a-5p   |
| MSTRG.17500.2 | miR-344d-2-5p |
| MSTRG.17500.2 | miR-6937-3p   |
| MSTRG.17500.2 | miR-211-5p    |
| MSTRG.17500.2 | miR-7231-5p   |
| MSTRG.17500.2 | miR-7000-3p   |
| MSTRG.17500.2 | miR-6516-3p   |
| MSTRG.17500.2 | miR-21b       |
| MSTRG.17500.2 | miR-5626-3p   |
| MSTRG.17500.2 | miR-350-3p    |
| MSTRG.17500.2 | miR-377-3p    |
| MSTRG.17500.2 | miR-297c-5p   |
| MSTRG.17500.2 | miR-297a-5p   |
| MSTRG.17500.2 | miR-363-5p    |
| MSTRG.17500.2 | miR-204-5p    |
| MSTRG.17500.2 | miR-339-5p    |
| MSTRG.17500.2 | miR-7008-3p   |
| MSTRG.17500.2 | miR-3076-5p   |
| MSTRG.17500.2 | miR-1964-5p   |
| MSTRG.17500.2 | miR-1961      |
| MSTRG.17500.2 | miR-7646-5p   |
| MSTRG.17500.2 | miR-5619-3p   |
| MSTRG.17500.2 | miR-6946-3p   |
| MSTRG.17500.2 | miR-182-5p    |
| MSTRG.17500.2 | miR-3078-3p   |
| MSTRG.17500.2 | miR-3099-5p   |
| MSTRG.17500.2 | miR-7026-5p   |
| MSTRG.17500.2 | miR-6952-3p   |
| MSTRG.17500.2 | miR-1839-5p   |
| MSTRG.17500.2 | miR-185-3p    |
| MSTRG.17500.2 | miR-1231-5p   |
| MSTRG.17500.2 | miR-7243-3p   |
| MSTRG.17500.2 | miR-433-5p    |
| MSTRG.17500.2 | miR-210-5p    |
| MSTRG.17500.2 | miR-664-5p    |
| MSTRG.17500.2 | miR-1258-5p   |
| MSTRG.17500.2 | miR-204-3p    |
| MSTRG.17500.2 | miR-145a-3p   |
| MSTRG.17500.2 | miR-1954      |
| MSTRG.17500.2 | miR-1194      |
| MSTRG.17500.2 | miR-7214-5p   |
| MSTRG.17500.2 | miR-1968-5p   |
| MSTRG.17500.2 | miR-340-5p    |
| MSTRG.17500.2 | miR-764-5p    |

---

---

|               |              |
|---------------|--------------|
| MSTRG.17500.2 | miR-7056-5p  |
| MSTRG.17500.2 | miR-298-5p   |
| MSTRG.17500.2 | miR-6975-3p  |
| MSTRG.17500.2 | miR-1188-5p  |
| MSTRG.17500.2 | miR-6899-3p  |
| MSTRG.17500.2 | miR-331-3p   |
| MSTRG.17500.2 | miR-24-3p    |
| MSTRG.17500.2 | miR-3098-3p  |
| MSTRG.17500.2 | miR-6959-5p  |
| MSTRG.17500.2 | miR-6998-3p  |
| MSTRG.17500.2 | miR-1198-5p  |
| MSTRG.17500.2 | miR-3106-3p  |
| MSTRG.17500.2 | miR-6903-5p  |
| MSTRG.17500.2 | miR-365-2-5p |
| MSTRG.17500.2 | miR-365-1-5p |
| MSTRG.17500.2 | miR-421-5p   |
| MSTRG.17500.2 | miR-666-3p   |
| MSTRG.17500.2 | miR-6908-5p  |
| MSTRG.17500.2 | miR-511-3p   |
| MSTRG.17500.2 | miR-539-5p   |
| MSTRG.17500.2 | miR-3057-5p  |
| MSTRG.17500.2 | miR-139-5p   |
| MSTRG.17500.2 | miR-450b-5p  |
| MSTRG.17500.2 | miR-6918-5p  |
| MSTRG.17500.2 | miR-466i-5p  |
| MSTRG.17500.2 | miR-669c-3p  |
| MSTRG.17500.2 | miR-466d-5p  |
| MSTRG.17500.2 | miR-466k     |
| MSTRG.17500.2 | miR-6903-3p  |
| MSTRG.17500.2 | miR-7116-3p  |
| MSTRG.17500.2 | miR-669m-5p  |
| MSTRG.17500.2 | miR-466m-5p  |
| MSTRG.17500.2 | miR-466j     |
| MSTRG.17500.2 | miR-466h-5p  |
| MSTRG.17500.2 | miR-223-5p   |
| MSTRG.17500.2 | miR-1187     |
| MSTRG.17500.2 | miR-466p-5p  |
| MSTRG.17500.2 | miR-466a-5p  |
| MSTRG.17500.2 | miR-466e-5p  |
| MSTRG.17500.2 | miR-466n-5p  |
| MSTRG.17500.2 | miR-466o-3p  |
| MSTRG.17500.2 | miR-466m-3p  |
| MSTRG.17500.2 | miR-7116-5p  |
| MSTRG.17500.2 | miR-669k-5p  |

---

---

|               |             |
|---------------|-------------|
| MSTRG.17500.2 | miR-466l-3p |
| MSTRG.17500.2 | miR-199b-3p |
| MSTRG.17500.2 | miR-199a-3p |
| MSTRG.17500.2 | miR-5125    |
| MSTRG.17500.2 | miR-6902-5p |
| MSTRG.17500.2 | miR-7042-5p |
| MSTRG.17500.2 | miR-17-3p   |
| MSTRG.17500.2 | miR-7117-5p |
| MSTRG.17500.2 | miR-3473e   |
| MSTRG.17500.2 | miR-3473b   |
| MSTRG.17500.2 | miR-6979-3p |
| MSTRG.17500.2 | miR-6944-3p |
| MSTRG.17500.2 | miR-20b-3p  |
| MSTRG.17500.2 | miR-3083-5p |
| MSTRG.17500.2 | miR-3059-5p |
| MSTRG.17500.2 | miR-7240-5p |
| MSTRG.17500.2 | miR-5101    |
| MSTRG.17500.2 | miR-3090-3p |
| MSTRG.17500.2 | miR-6940-3p |
| MSTRG.17500.2 | miR-672-3p  |
| MSTRG.17500.2 | miR-7073-5p |
| MSTRG.17500.2 | miR-3473a   |
| MSTRG.17500.2 | miR-185-5p  |
| MSTRG.17500.2 | miR-7675-3p |
| MSTRG.17500.2 | miR-6896-3p |
| MSTRG.17500.2 | miR-6948-5p |
| MSTRG.17500.2 | miR-3110-5p |
| MSTRG.17500.2 | miR-7032-3p |
| MSTRG.17500.2 | miR-7013-5p |
| MSTRG.17500.2 | miR-466e-3p |
| MSTRG.17500.2 | miR-466d-3p |
| MSTRG.17500.2 | miR-466a-3p |
| MSTRG.17500.2 | miR-297c-3p |
| MSTRG.17500.2 | miR-297b-3p |
| MSTRG.17500.2 | miR-297a-3p |
| MSTRG.17500.2 | miR-670-3p  |
| MSTRG.17500.2 | miR-7664-3p |
| MSTRG.17500.2 | miR-669m-3p |
| MSTRG.17500.2 | miR-467e-3p |
| MSTRG.17500.2 | miR-467d-3p |
| MSTRG.17500.2 | miR-467c-3p |
| MSTRG.17500.2 | miR-467b-3p |
| MSTRG.16327.2 | miR-466i-5p |
| MSTRG.16327.2 | miR-466k    |

---

---

|               |             |
|---------------|-------------|
| MSTRG.16327.2 | miR-466d-5p |
| MSTRG.16327.2 | miR-6903-3p |
| MSTRG.16327.2 | miR-28c     |
| MSTRG.16327.2 | miR-28b     |
| MSTRG.16327.2 | miR-23b-3p  |
| MSTRG.16327.2 | miR-23a-3p  |
| MSTRG.16327.2 | miR-1930-3p |
| MSTRG.16327.2 | miR-3057-5p |
| MSTRG.16327.2 | miR-6959-5p |
| MSTRG.16327.2 | miR-143-5p  |
| MSTRG.16327.2 | miR-122-5p  |
| MSTRG.16327.2 | miR-448-5p  |
| MSTRG.16327.2 | miR-6913-5p |
| MSTRG.16327.2 | miR-5621-5p |
| MSTRG.16327.2 | miR-101b-3p |
| MSTRG.16327.2 | miR-709     |
| MSTRG.16327.2 | miR-30f     |
| MSTRG.16327.2 | miR-142a-3p |
| MSTRG.16327.2 | miR-7651-5p |
| MSTRG.16327.2 | miR-214-3p  |
| MSTRG.16327.2 | miR-5710    |
| MSTRG.16327.2 | miR-466f    |
| MSTRG.16327.2 | miR-6985-5p |
| MSTRG.16327.2 | miR-1964-5p |
| MSTRG.14838.1 | miR-3084-3p |
| MSTRG.14838.1 | miR-7214-5p |
| MSTRG.14838.1 | miR-672-5p  |
| MSTRG.14838.1 | miR-3067-5p |
| MSTRG.14838.1 | miR-377-5p  |
| MSTRG.14838.1 | miR-153-5p  |
| MSTRG.14838.1 | miR-7671-5p |
| MSTRG.14838.1 | miR-7664-5p |
| MSTRG.14838.1 | miR-346-3p  |
| MSTRG.14838.1 | miR-182-5p  |
| MSTRG.1243.32 | miR-5101    |
| MSTRG.1243.32 | miR-7226-3p |
| MSTRG.1243.32 | miR-709     |
| MSTRG.1243.32 | miR-297c-3p |
| MSTRG.1243.32 | miR-297b-3p |
| MSTRG.1243.32 | miR-297a-3p |
| MSTRG.1243.32 | miR-1960    |
| MSTRG.1243.32 | miR-466o-3p |
| MSTRG.1243.32 | miR-466m-3p |
| MSTRG.1243.32 | miR-706     |

---

---

|               |               |
|---------------|---------------|
| MSTRG.1243.32 | miR-1b-5p     |
| MSTRG.1243.32 | miR-466c-3p   |
| MSTRG.1243.32 | miR-466d-3p   |
| MSTRG.1243.32 | miR-466a-3p   |
| MSTRG.1243.32 | miR-7092-3p   |
| MSTRG.1243.32 | miR-3967      |
| MSTRG.1243.32 | miR-222-3p    |
| MSTRG.1243.32 | miR-221-3p    |
| MSTRG.1243.32 | miR-6922-3p   |
| MSTRG.1243.32 | miR-466p-3p   |
| MSTRG.1243.32 | miR-466c-3p   |
| MSTRG.1243.32 | miR-466b-3p   |
| MSTRG.1243.32 | miR-7042-5p   |
| MSTRG.1243.32 | miR-6985-5p   |
| MSTRG.1243.32 | miR-182-3p    |
| MSTRG.1243.32 | miR-134-3p    |
| MSTRG.1243.32 | miR-7054-5p   |
| MSTRG.1243.32 | miR-547-5p    |
| MSTRG.1243.32 | miR-484       |
| MSTRG.1243.32 | miR-7010-5p   |
| MSTRG.1243.32 | miR-181d-5p   |
| MSTRG.1243.32 | miR-181c-5p   |
| MSTRG.1243.32 | miR-181b-5p   |
| MSTRG.1243.32 | miR-181a-5p   |
| MSTRG.1243.32 | miR-6913-5p   |
| MSTRG.1243.32 | miR-669f-3p   |
| MSTRG.1243.32 | miR-669b-3p   |
| MSTRG.1243.32 | miR-467a-3p   |
| MSTRG.1243.32 | miR-1264-3p   |
| MSTRG.1243.32 | miR-5626-3p   |
| MSTRG.1243.32 | miR-136-5p    |
| MSTRG.1243.32 | miR-181b-2-3p |
| MSTRG.1243.32 | miR-181b-1-3p |
| MSTRG.1243.32 | miR-6942-5p   |
| MSTRG.1243.32 | miR-7052-3p   |
| MSTRG.1243.32 | miR-6996-5p   |
| MSTRG.1243.32 | miR-30e-3p    |
| MSTRG.1243.32 | miR-30d-3p    |
| MSTRG.1243.32 | miR-30a-3p    |
| MSTRG.1243.32 | miR-669c-3p   |
| MSTRG.1243.32 | miR-7027-5p   |
| MSTRG.1243.32 | miR-362-3p    |
| MSTRG.1243.32 | miR-329-3p    |
| MSTRG.1243.32 | miR-146a-3p   |

---

---

|               |              |
|---------------|--------------|
| MSTRG.1243.32 | miR-466f-3p  |
| MSTRG.1243.32 | miR-383-3p   |
| MSTRG.1243.32 | miR-6946-3p  |
| MSTRG.1243.32 | miR-6999-5p  |
| MSTRG.1243.32 | miR-504-3p   |
| MSTRG.1243.32 | miR-6958-3p  |
| MSTRG.1243.32 | miR-3100-5p  |
| MSTRG.1243.32 | miR-30c-2-3p |
| MSTRG.1243.32 | miR-30c-1-3p |
| MSTRG.1243.32 | miR-676-5p   |
| MSTRG.1243.32 | miR-7073-5p  |
| MSTRG.1243.32 | miR-18a-5p   |
| MSTRG.1243.32 | miR-7116-3p  |
| MSTRG.1243.32 | miR-7b-5p    |
| MSTRG.1243.32 | miR-7a-5p    |
| MSTRG.1243.32 | miR-187-5p   |
| MSTRG.1243.32 | miR-3971     |
| MSTRG.1243.32 | miR-1194     |
| MSTRG.1243.32 | miR-7669-5p  |
| MSTRG.1243.32 | miR-7051-5p  |
| MSTRG.1243.32 | miR-7015-5p  |
| MSTRG.1243.32 | miR-669m-3p  |
| MSTRG.1243.32 | miR-467e-3p  |
| MSTRG.1243.32 | miR-467d-3p  |
| MSTRG.1243.32 | miR-467c-3p  |
| MSTRG.1243.32 | miR-467b-3p  |
| MSTRG.1243.32 | miR-466n-3p  |
| MSTRG.1243.32 | miR-669i     |
| MSTRG.1243.32 | miR-7115-3p  |
| MSTRG.1243.32 | miR-702-5p   |
| MSTRG.1243.32 | miR-335-3p   |
| MSTRG.1243.32 | miR-6902-3p  |
| MSTRG.1243.32 | miR-760-5p   |
| MSTRG.1243.32 | miR-501-5p   |
| MSTRG.1243.32 | miR-7661-3p  |
| MSTRG.1243.32 | miR-6903-5p  |
| MSTRG.1243.32 | miR-466i-3p  |
| MSTRG.1243.32 | miR-6769b-3p |
| MSTRG.1243.32 | miR-141-5p   |
| MSTRG.1243.32 | miR-128-3p   |
| MSTRG.1243.32 | miR-6539     |
| MSTRG.1243.32 | miR-664-3p   |
| MSTRG.1243.32 | miR-743b-3p  |
| MSTRG.1243.32 | miR-488-3p   |

---



---

|               |               |
|---------------|---------------|
| MSTRG.1243.32 | miR-6983-5p   |
| MSTRG.1243.32 | miR-1941-5p   |
| MSTRG.1243.32 | miR-551b-5p   |
| MSTRG.1243.32 | miR-3068-5p   |
| MSTRG.1243.32 | miR-3969      |
| MSTRG.1243.32 | miR-6911-5p   |
| MSTRG.1243.32 | miR-376b-3p   |
| MSTRG.1243.32 | miR-7055-5p   |
| MSTRG.1243.32 | miR-744-3p    |
| MSTRG.1243.32 | miR-874-3p    |
| MSTRG.1243.32 | miR-490-5p    |
| MSTRG.1243.32 | miR-7012-5p   |
| MSTRG.1243.32 | miR-3572-3p   |
| MSTRG.1243.32 | miR-412-3p    |
| MSTRG.1243.32 | miR-378a-5p   |
| MSTRG.1243.32 | miR-1251-5p   |
| MSTRG.1243.32 | miR-7b-3p     |
| MSTRG.1243.32 | miR-7a-2-3p   |
| MSTRG.1243.32 | miR-152-3p    |
| MSTRG.1243.32 | miR-148b-3p   |
| MSTRG.1243.32 | miR-148a-3p   |
| MSTRG.1243.32 | miR-7668-5p   |
| MSTRG.1243.32 | miR-330-5p    |
| MSTRG.1243.32 | miR-338-3p    |
| MSTRG.1243.32 | miR-1983      |
| MSTRG.1243.32 | miR-7081-3p   |
| MSTRG.1243.32 | miR-219a-1-3p |
| MSTRG.1243.32 | miR-194-2-3p  |
| MSTRG.1243.32 | miR-6984-3p   |
| MSTRG.1243.32 | miR-6901-5p   |
| MSTRG.1243.32 | miR-5129-5p   |
| MSTRG.1243.32 | miR-300-5p    |
| MSTRG.1243.32 | miR-877-3p    |
| MSTRG.1243.32 | miR-326-3p    |
| MSTRG.1243.32 | miR-222-5p    |
| MSTRG.1243.32 | miR-365-3p    |
| MSTRG.1243.32 | miR-7043-3p   |
| MSTRG.1243.32 | miR-193b-5p   |
| MSTRG.1243.32 | miR-1981-3p   |
| MSTRG.1243.32 | miR-701-3p    |
| MSTRG.1243.32 | miR-511-3p    |
| MSTRG.1243.32 | miR-7068-3p   |
| MSTRG.1243.32 | miR-3090-3p   |
| MSTRG.1243.32 | miR-1247-3p   |

---

---

|               |               |
|---------------|---------------|
| MSTRG.1243.32 | miR-539-5p    |
| MSTRG.1243.32 | miR-129b-3p   |
| MSTRG.1243.32 | miR-6946-5p   |
| MSTRG.1243.32 | miR-202-5p    |
| MSTRG.1243.32 | miR-483-3p    |
| MSTRG.1243.32 | miR-450b-3p   |
| MSTRG.1243.32 | miR-450a-1-3p |
| MSTRG.1243.32 | miR-130a-5p   |
| MSTRG.1243.32 | miR-495-5p    |
| MSTRG.1243.32 | miR-22-5p     |
| MSTRG.1243.32 | miR-3082-3p   |
| MSTRG.1243.32 | miR-186-5p    |
| MSTRG.1243.32 | miR-1291      |
| MSTRG.1243.32 | miR-6941-5p   |
| MSTRG.1243.32 | let-7f-2-3p   |
| MSTRG.1243.32 | miR-6999-3p   |
| MSTRG.1243.32 | miR-679-5p    |
| MSTRG.1243.32 | miR-6240      |
| MSTRG.1243.32 | miR-770-3p    |
| MSTRG.1243.32 | miR-350-3p    |
| MSTRG.1243.32 | miR-6991-5p   |
| MSTRG.1243.32 | miR-1930-5p   |
| MSTRG.1243.32 | miR-1668      |
| MSTRG.1243.32 | miR-879-5p    |
| MSTRG.1243.32 | miR-6985-3p   |
| MSTRG.1243.32 | miR-673-5p    |
| MSTRG.1243.32 | miR-6918-5p   |
| MSTRG.1243.32 | miR-345-3p    |
| MSTRG.1243.32 | miR-139-5p    |
| MSTRG.1243.32 | miR-24-3p     |
| MSTRG.1243.32 | miR-5620-3p   |
| MSTRG.1243.32 | miR-7651-5p   |
| MSTRG.1243.32 | miR-330-3p    |
| MSTRG.1243.32 | miR-298-3p    |
| MSTRG.1243.32 | miR-7665-5p   |

---

**Table S11.** Information of RNAs in the L-M-T network based on RNA-seq results.

| RNA               | Cortex                       |                        |                       |            | Hippocampus                  |                        |                        |            |
|-------------------|------------------------------|------------------------|-----------------------|------------|------------------------------|------------------------|------------------------|------------|
|                   | Log <sub>2</sub> Fold Change | <i>p</i> -value        | <i>q</i> -value       | Regulation | Log <sub>2</sub> Fold Change | <i>p</i> -value        | <i>q</i> -value        | Regulation |
| ENSMUST0000127786 | 11.46                        | $3.74 \times 10^{-5}$  | $1.57 \times 10^{-6}$ | up         | 10.49                        | $5.72 \times 10^{-11}$ | $2.86 \times 10^{-8}$  | up         |
| ENSMUSG0000098912 | -16.56                       | $6.00 \times 10^{-12}$ | $3.79 \times 10^{-9}$ | down       | -1.68                        | $1.49 \times 10^{-5}$  | $2.26 \times 10^{-3}$  | down       |
| miR-362-3p        | 0.72                         | $1.01 \times 10^{-6}$  | $1.36 \times 10^{-4}$ | up         | 0.15                         | $5.28 \times 10^{-1}$  | $8.87 \times 10^{-1}$  | up         |
| miR-329-3p        | -0.10                        | $4.49 \times 10^{-1}$  | $7.26 \times 10^{-1}$ | down       | -0.21                        | $3.44 \times 10^{-1}$  | $8.21 \times 10^{-1}$  | down       |
| miR-466i-3p       | -0.41                        | $5.69 \times 10^{-1}$  | 1.00                  | down       | 1.07                         | $1.07 \times 10^{-1}$  | 1.00                   | up         |
| miR-669b-5p       | 1.15                         | $2.46 \times 10^{-2}$  | $1.89 \times 10^{-1}$ | up         | 0.59                         | $3.28 \times 10^{-1}$  | 1.00                   | up         |
| miR-3057-5p       | 0.25                         | $4.17 \times 10^{-1}$  | $7.17 \times 10^{-1}$ | up         | -0.23                        | $4.95 \times 10^{-1}$  | $8.76 \times 10^{-1}$  | down       |
| miR-5101          | -0.59                        | $6.63 \times 10^{-1}$  | 1.00                  | down       | 0.69                         | $6.09 \times 10^{-1}$  | 1.00                   | up         |
| miR-15a-5p        | 0.62                         | $9.48 \times 10^{-4}$  | $2.36 \times 10^{-2}$ | up         | 0.25                         | $3.21 \times 10^{-1}$  | $7.88 \times 10^{-1}$  | up         |
| miR-466o-3p       | -1.46                        | $7.00 \times 10^{-1}$  | 1.00                  | down       | -1.54                        | $6.09 \times 10^{-1}$  | 1.00                   | down       |
| miR-466m-3p       | -2.33                        | $2.27 \times 10^{-1}$  | 1.00                  | down       | -1.44                        | $7.25 \times 10^{-1}$  | 1.00                   | down       |
| miR-539-5p        | -0.09                        | $7.49 \times 10^{-1}$  | $8.97 \times 10^{-1}$ | down       | -0.05                        | $8.63 \times 10^{-1}$  | $9.69 \times 10^{-1}$  | down       |
| Clec7a            | 5.99                         | $2.38 \times 10^{-5}$  | $3.26 \times 10^{-3}$ | up         | 7.46                         | $1.10 \times 10^{-5}$  | $1.76 \times 10^{-3}$  | up         |
| Elovl2            | 10.03                        | $1.89 \times 10^{-7}$  | $5.62 \times 10^{-5}$ | up         | 6.87                         | $2.12 \times 10^{-6}$  | $4.34 \times 10^{-4}$  | up         |
| Fnbp1             | 16.14                        | $4.15 \times 10^{-6}$  | $7.74 \times 10^{-4}$ | up         | -16.40                       | $8.16 \times 10^{-20}$ | $1.57 \times 10^{-16}$ | down       |
| 5730455P16Rik     | 10.51                        | $3.57 \times 10^{-7}$  | $9.41 \times 10^{-5}$ | up         | -11.23                       | $1.29 \times 10^{-8}$  | $4.25 \times 10^{-6}$  | down       |
